# Supplementary material for: Identification of Key Genes of Human Advanced Diabetic Nephropathy Independent of Proteinuria by Transcriptome Analysis
Source: Biomed Res Int. 2020 Jun 26;2020:7283581. doi: 10.1155/2020/7283581 (PMC7336202; doi:10.1155/2020/7283581)
Supplement: Supplementary Materials — Supplementary File 1: Complete lists of DEGs (Fold change >1.5) in glomerular and tubulointerstitial compartments between DN versus healthy controls, MN or MCD. Supplementary File 2: GO annotation for upregulated DEGs in glomeruli and tubulointerstitial compartments, and downregulated DEGs in tubulointerstitium. Supplementary File 3: GO annotation of biological process for upregulated glomerular and tubulointerstitial DEGs enriched in extracellular vesicles. [file 7283581.f1.xlsx]

## Sheet: Suppl1
	Supplemental File 1: Complete lists of DEGs (Foldchange > 1.5) in glomerular and tubulointerstitial compartments between DN versus healthy controls, MN or MCD
	Glomerular and tublointersitial shared DEGs in DN compared to all of those in LD, MCD and MN										Glomerular DEGs in the remaining 6 areas in Figure 1a																					Tubulointerstitial DEGs in the remaining 6 areas in Figure 1b
	DEGs in glomeruli					DEGs in tubulointerstitium					solely differentially expressed in healthy control or MN or MCD compared to DN									simultaneously differentially expressed in two controls compared to DN												solely differentially expressed in healthy control or MN or MCD compared to DN									simultaneously differentially expressed in two controls compared to DN
	Gene	DNvsH	DNvsMCD	DNvsMN		Gene	DNvsH	DNvsMCD	DNvsMN		Gene	logFC.DNvsH （n=369）		Gene	logFC.DNvsMCD （n=70）		Gene	logFC.DNvsMN （n=1627）		In H and MCD (n=142)				In H and MN (n=274)				In MCD and MN (n=42)				Gene	logFC.DNvsH (n=220)		Gene	logFC.DNvsMCD (n=133)		Gene	logFC.DNvsMN (n=777)		In H and MCD (n=138)				In H and MN (n=384)				In MN and MCD (n=48)
																				Gene	logFC.DNvsH	logFC.DNvsMCD		Gene	logFC.DNvsH	logFC.DNvsMN		Gene	logFC.DNvsMCD	logFC.DNvsMN											Gene	logFC.DNvsH	logFC.DNvsMCD		Gene	logFC.DNvsH	logFC.DNvsMN		Gene
	IGH	3.31586	3.74111	3.48761		LTF	3.6353	2.95855	2.54462		HBB	2.82328		MAFF	1.90946		SCNN1A	1.8985		TGFBI	2.28844	2.18068		TAC1	1.57341	1.03605		TFRC	0.927017	1.30486		HBB	2.6189		SRGN	1.61549		HOXA11	0.886265		RHCG	-1.29863	-1.08591		PDK4	-2.79445	-0.956536		KLF4
	COL1A2	3.05414	2.1731	1.9167		CXCL6	3.49504	3.00471	2.76973		HBA1	2.80066		RGS1	1.35356		CAMK2N1	1.66483		COLEC12	2.0589	2.74419		PLK2	1.45286	0.712487		CRISPLD2	0.925779	1.00541		CYP24A1	1.16711		CXCR4	1.20889		FAXDC2	0.882681		SLC22A8	-1.23396	-1.36527		USP2	-2.76	-1.96726		LIPG
	CXCL6	2.92925	2.46816	2.61251		LYZ	2.93343	2.78805	1.88223		HTR2B	1.95446		RGCC	1.34095		SP3	1.38345		ECM1	1.9067	1.36547		PLAC8	1.36962	0.774698		CXCL2	0.908904	0.829253		TNFSF10	1.08465		GJA1	1.13528		PGLYRP4	0.872822		EGR1	-0.993255	1.19301		FKBP5	-2.52832	-1.52022		KCTD12
	FN1	2.89906	2.0349	1.46625		IGH	2.90177	3.44451	2.89422		REN	1.72815		OMD	1.24313		ACKR3	1.36462		CYAT1	1.79174	2.11034		RRM2	1.36778	1.42694		TFAP2A	0.827393	1.05455		PLTP	0.972969		IER3	1.11925		CILP	0.870712		CDHR5	-0.961501	-0.992805		PTPRO	-2.13079	-1.2471		KLF2
	NNMT	2.79673	3.25276	2.16999		IGLC1	2.81686	3.53972	2.60964		HLX	1.46096		EGR1	1.15767		ERLIN2	1.36255		ACTA2	1.69566	1.31273		ACPP	1.26432	1.64767		DIO2	0.787238	0.661714		TTC39A	0.959135		RND3	1.04305		HLA-DRB4	0.861291		FTCD	-0.942795	-0.942477		DUSP1	-1.96054	-0.636083		AGRN
	MS4A4A	2.73179	2.34038	1.97527		VCAN	2.75805	2.56411	2.1571		FCN1	1.4529		IER3	0.922118		F2RL1	1.34076		CDH12	1.69236	1.73097		GATA3	1.26327	0.853888		MARCHF1	0.773651	0.66688		PIK3R3	0.944822		NTRK2	1.02366		WNT6	0.839402		CPNE6	-0.930464	-1.36824		CHI3L1	-1.95767	-0.941628		MAP1B
	C1QB	2.68284	2.44086	2.43073		NNMT	2.50836	3.21244	2.3435		POSTN	1.36569		DUSP6	0.894382		MED16	1.32107		SRPX2	1.57877	1.31779		GPR37	1.25526	1.12821		SLCO4A1	0.756128	0.602426		GCNT3	0.934736		ID1	1.01217		NUP214	0.819062		SLC4A1	-0.905464	-0.726354		PSPH	-1.94897	-1.29655		TXNIP
	COMP	2.65982	2.39945	2.44394		SLPI	2.46713	2.18887	2.18814		ADAMTS1	1.31207		PLXNC1	0.811653		CXCL12	1.3033		INSL4	1.42465	1.32283		CKS2	1.23117	1.53575		EPB41L4B	0.71479	0.907597		CDH11	0.896651		PDGFRA	0.985615		SIGLEC6	0.814272		TNNC1	-0.86995	-0.681158		PODXL	-1.92445	-1.31772		THEMIS2
	RGS4	2.56068	1.93983	2.18358		PROM1	2.33189	2.51154	1.67947		CXCR4	1.08948		KCNK1	0.808191		CTSB	1.29907		KCNE4	1.40492	1.11928		RGS3	1.20573	0.76286		NAV3	0.700836	0.962534		OLFM4	0.889831		C7	0.971464		JMJD7-PLA2G4B	0.812793		KLHL3	-0.807714	-0.669911		TIPARP	-1.90573	-0.607966		HNRNPA3
	RARRES1	2.50364	2.32988	2.18023		MMP7	2.29465	2.5966	1.56257		SOX17	1.06592		OLFM4	0.8049		DIP2C	1.26419		ASPN	1.37274	1.52869		CASP1	1.1558	0.651941		KCTD12	0.67913	-1.34011		SERPINF1	0.880145		CYR61	0.955862		MEFV	0.804804		CA2	-0.802231	-0.732059		SOCS2	-1.76482	-0.697802		C1QTNF3
	COL15A1	2.43574	1.16956	2.28352		IGK	2.29336	2.70992	2.41864		MECOM	1.04501		GOLM1	0.794966		EVC	1.23064		S100A4	1.34578	1.06071		LPAR6	1.138	0.657395		PLCB4	0.663486	0.609292		RTP4	0.858414		TMSB4X	0.955715		MUC5AC	0.796848		TLN2	-0.793505	-0.721034		KLF9	-1.67051	-1.07167		SLA
	CD52	2.43456	1.69018	1.54491		CPA3	2.24575	1.83227	1.9669		PPP1R3C	1.038		NUDT4	0.767584		GPR126	1.22587		CD14	1.33034	1.27311		CDH11	1.13409	1.02612		PDK3	0.657802	0.79699		B4GALT5	0.856491		ADH1B	0.931116		ZNF236	0.791868		PDK2	-0.783162	-0.778143		ATP6V1A	-1.60849	-2.51753		ERBB4
	CX3CR1	2.40362	1.33901	1.55586		CYAT1	2.20331	2.70677	2.15968		NFKBIE	1.0271		OLR1	0.75016		PHF1	1.19972		CAPN6	1.21879	1.45422		CECR1	1.12425	1.05875		NLRP3	0.652534	0.883885		MNS1	0.855972		CD14	0.923015		SPATA20	0.77855		GRAMD1B	-0.764538	-0.603586		GADD45A	-1.55971	-1.09768		GABRP
	LUM	2.38967	2.33582	2.94974		FCER1A	2.16126	1.77374	1.74472		CCL20	1.01023		SCPEP1	0.75013		TRIB1	1.17421		PRSS23	1.21023	1.04086		MICB	1.11168	0.770811		ANXA4	0.650574	0.69877		SACS	0.809178		DCN	0.891087		ACSL6	0.778241		POLD3	-0.764049	-0.814872		AASS	-1.38234	-1.51056		AIFM1
	C1QA	2.33958	1.86065	1.72621		C3	2.15693	2.0231	1.53447		EMP3	0.966945		GATA6	0.747635		KDM2A	1.16894		CORO1A	1.1975	0.911797		MYOZ2	1.10306	-0.795024		SRGN	0.649123	-0.684719		LDLRAD4	0.80466		CEBPB	0.881649		CYP2B7P	0.777142		ALPL	-0.761427	-0.728741		CDC42BPA	-1.34513	-2.76204		GMCL1
	THBS2	2.32023	1.77404	2.16504		ALOX5	2.13317	2.11821	1.55503		NKG7	0.957936		THEMIS2	0.71748		SFN	1.16614		NT5E	1.17086	1.36043		LTBP1	1.09396	0.714165		TNFAIP3	0.632327	0.77631		NMI	0.804193		HSPB8	0.881598		FST	0.775209		SERPINF2	-0.750167	-0.723125		RORA	-1.33807	-1.72613		SLC25A46
	C3	2.30665	1.75217	1.70231		WFDC2	2.10448	1.74354	1.73743		CCL4	0.943152		FAM107A	0.716988		ZMIZ2	1.14723		RUNX1	1.16552	1.03159		GJA4	1.09389	0.836547		TNFRSF1A	0.631472	0.645472		CCL8	0.800305		PTN	0.877321		TESK2	0.771602		AHCY	-0.738486	-0.925411		CTGF	-1.33487	-0.873379		DDO
	ALOX5	2.23292	2.0075	1.63876		IGKC	2.09235	2.21698	2.10369		WNT5B	0.934154		ALOX5AP	0.714767		INTS5	1.13986		GPM6B	1.16203	1.32091		TAGLN	1.09295	-0.933643		COL18A1	0.625208	1.20102		NEFL	0.788322		CKAP2	0.864561		ZNF532	0.770312		HDAC6	-0.737913	-0.668885		ETNK2	-1.32285	-0.921704		F11
	DKK3	2.20977	2.22595	1.92071		CX3CR1	2.03774	1.18688	1.42663		FABP5	0.92717		DFNA5	0.700435		MUM1	1.13513		PRKCDBP	1.14934	0.827439		SRPX	1.08874	1.49631		SAT1	0.613301	-1.36024		SERPINE2	0.786668		SPARC	0.841587		MID2	0.750629		ETNPPL	-0.724908	-1.03688		CYP3A5	-1.31317	-0.619401		ESR1
	IGLC1	2.20371	2.6997	2.60157		ITGB6	2.03202	1.74744	1.37687		CBR3	0.91266		DPP4	0.699492		CALR	1.11731		GPR65	1.14881	0.831822		FGL2	1.06453	0.590975		UQCR11	0.602071	0.666557		GUCY1B3	0.781939		CXCL2	0.83952		Igk	0.748502		DUSP6	-0.689185	0.861492		IL6R	-1.30258	-0.60172		ARSB
	CD44	2.20327	1.82507	2.15501		REG1A	2.00372	1.50932	1.51923		BAX	0.900747		NFIL3	0.671998		PTPRF	1.10802		TWIST1	1.12857	0.649535		ANXA3	1.05871	0.775834		IFRD1	0.58556	0.730302		IL32	0.77522		TGFBR2	0.832193		GRK6	0.746234		RGS2	-0.683846	1.07777		APOLD1	-1.29829	-0.6243		HIST1H2BD
	COL6A3	2.19412	1.6427	1.79458		TFPI2	1.98112	1.64622	1.32626		GNAI1	0.887045		WLS	0.653906		EPS8L2	1.08008		LTB	1.11304	0.733783		KIAA1462	1.0582	0.740955		PHIP	-0.593264	-0.815914		IL7	0.766426		SCRN1	0.826479		PSG6	0.742971		PKP2	-0.680539	-0.609841		ESRRG	-1.29058	-1.78792		BTD
	LYZ	2.16928	1.90985	1.86651		IGLV1-44	1.97673	2.34964	1.96164		FXYD5	0.886662		NAV2	0.653654		TRIM8	1.07966		MEF2C	1.10772	0.673139		SELE	1.03778	0.811591		MAPRE2	-0.593591	-0.938082		KIAA0101	0.763283		IER5	0.823326		SMARCA4	0.739121		GAD1	-0.677161	-0.631493		CPM	-1.29015	-1.59163		ABCC2
	PHLDA2	2.1339	1.74096	1.48529		CD52	1.87627	1.64962	1.22847		GNLY	0.885565		CLUL1	0.652528		S100A8	1.07311		ARPC1B	1.10666	0.834011		TCIRG1	1.02627	1.42661		PPP3R1	-0.61648	0.710355		KDELC1	0.751594		CRISPLD2	0.817632		CES1	0.737581		PKLR	-0.659449	-0.868256		OSBPL1A	-1.27673	-1.95766		VIL1
	CD36	2.13002	1.50617	1.67125		SERPINA3	1.87161	1.48155	1.78734		CDC20	0.884277		TMEM165	0.64595		HNRNPUL1	1.07097		HCK	1.10603	0.946978		TMEM97	1.01632	1.60782		TCF21	-0.640526	-0.929344		NRCAM	0.74992		IQGAP1	0.814277		CD84	0.73424		PXMP2	-0.65797	-0.941323		TIMP3	-1.25221	-1.57647		GPS1
	RGS5	2.11994	2.30372	1.83174		ACKR1	1.85813	1.73132	1.92721		PCDH17	0.882811		PIGT	0.633202		SELL	1.05359		MATN2	1.10246	1.04983		CHODL	1.00728	0.751441		TUG1	-0.645598	-1.48843		IFI44	0.747014		ATP9A	0.81043		MLPH	0.728336		CLPTM1	-0.655639	-0.595404		WNK1	-1.25026	-1.53258		FASTKD3
	MOXD1	2.08676	1.83445	2.14849		RARRES1	1.83025	1.59455	1.37345		ICAM2	0.879904		CLDN7	0.626983		VDR	1.04538		CSF2RB	1.07864	1.28106		CEP55	0.988097	0.795934		DKFZP586I1420	-0.651396	-1.34699		RBP1	0.739043		FILIP1L	0.802195		ITSN1	0.726462		HYAL1	-0.655109	-0.739916		SLC16A7	-1.24342	-1.47588		STX3
	CXCL1	2.05504	1.88292	2.28148		TIMP1	1.80357	1.9171	1.39449		NFATC1	0.873797		EXOSC8	0.624614		CDH16	1.04391		LST1	1.07205	0.843682		PRC1	0.984553	0.778897		CBR4	-0.653415	-0.861988		ZEB2	0.7382		IL1R1	0.785479		HMGN4	0.723145		DNASE1	-0.653508	-0.66091		EIF5	-1.23153	-1.9023		GAL3ST1
	FMO3	2.04673	2.29787	1.85453		VWF	1.79351	1.67908	1.60883		2020-03-01	0.872196		RPS11	0.618927		HABP2	1.04253		CHGA	1.06474	1.36348		NUSAP1	0.981717	1.1459		SEC14L1	-0.671543	-1.36811		ACPP	0.733568		ETS2	0.774667		KHNYN	0.721828		MICU1	-0.64292	-0.592836		FAM134B	-1.22852	-0.827143		FABP3
	COL1A1	2.0284	1.46611	1.47575		AGR2	1.77215	1.53914	1.81741		MARCO	0.872141		RPS29	0.615579		RAB1B	1.03627		IFI30	1.06281	0.890294		KIF20A	0.98136	0.812509		SH3BP5	-0.674069	-1.5383		PON2	0.731381		LPAR1	0.770229		EFNB3	0.718236		MSRA	-0.634886	-0.872318		PPIG	-1.2257	-2.67143		GNPDA1
	MS4A6A	2.00824	1.75098	1.89805		CCR2	1.76109	1.39474	1.64092		NDC80	0.86729		MYO10	0.613408		NR2F2	1.02524		PYGL	1.05413	0.896694		RELN	0.979195	1.59824		IFIT1	-0.703499	-1.00343		ELOVL6	0.730316		HIF1A	0.768904		IL15	0.717483		PHGDH	-0.620235	-0.653211		IGFBP5	-1.19473	-1.95291		ALDH5A1
	CPA3	1.94942	1.91351	2.02365		TNC	1.71064	1.75668	1.41098		GUCY1A3	0.861391		MR1	0.610702		GGA1	1.02181		HOMER3	1.05232	0.71433		CDR2L	0.978702	0.679193		SNX1	-0.703525	-1.2002		IL33	0.730125		MXRA7	0.767152		PYGB	0.716806		PLCL1	-0.618887	-0.720882		MT1M	-1.18597	-1.00036		AKR7A2
	COL5A2	1.93961	1.58363	1.37831		CCL19	1.67219	1.42503	1.51497		NETO2	0.859292		IL18	0.60756		SMARCA4	1.0188		EPB41L2	1.04015	0.691141		ELK3	0.974276	0.764509		RSAD2	-0.711965	-0.952834		ARHGAP29	0.729478		SLC39A6	0.764661		CHD3	0.715876		HSD11B2	-0.616557	-0.589508		CALD1	-1.17251	-2.09575		FDX1
	ACTN1	1.91854	1.6372	1.66008		COL1A2	1.66696	1.07031	1.07518		CENPU	0.856821		PPP2R1B	0.605592		KATNB1	1.01382		GBP2	1.03708	0.723887		COL6A2	0.969843	0.678727		ACTN4	-0.750359	-0.645288		RRM2	0.726982		CXADR	0.752674		PEAK1	0.715196		SUCLG1	-0.614172	-0.758488		NPHS1	-1.16677	-0.660546		PCTP
	CFD	1.91831	1.75393	1.53642		ANXA1	1.6492	1.83219	1.37097		NOTCH3	0.85186		ARSJ	0.605071		SLC12A1	1.01256		CLEC10A	0.987154	0.989952		GINS1	0.960548	0.918832		KDR	-0.752851	-0.668711		NPAS2	0.72608		ITGAV	0.750236		GNAZ	0.71414		PDLIM2	-0.603008	-0.628611		KTN1	-1.15501	-2.13966		AQP7
	MARCKS	1.90826	1.53379	1.67292		TAC1	1.6347	1.4377	0.850346		FRZB	0.845318		GSTM3	0.604366		ATF5	0.999514		EXT1	0.982658	0.971026		SLC43A3	0.959386	0.748136		FXYD1	-0.760994	-0.876466		IRX5	0.726033		ADAM9	0.745856		P2RY6	0.707803		GAMT	-0.601725	-0.750029		MYO6	-1.15377	-2.70582		MAP7
	VSIG4	1.8823	1.85926	1.75992		PXDN	1.62971	1.41257	1.2632		DOCK10	0.844097		AHR	0.603451		CNOT2	0.994253		PDLIM1	0.981938	0.901331		LAT	0.943849	0.940477		EFNB2	-0.788965	-1.20399		CLEC4A	0.722589		FRZB	0.736795		PABPC4	0.703424		ECHDC2	-0.599439	-0.601677		SLC31A2	-1.15095	-0.854247		SLC22A7
	LTF	1.86538	1.41033	1.08247		LY96	1.61187	1.39639	1.22768		CD93	0.826557		NOP14-AS1	0.603262		RRP1B	0.9935		GZMB	0.966572	0.736323		CEBPA	0.941268	0.717788		DDX60	-0.796689	-0.74031		BTN3A2	0.715514		LEF1	0.71176		FPR1	0.70095		HLF	-0.597017	-0.603755		SPOCK2	-1.14539	-0.711227		ANXA9
	CRIP1	1.86141	1.29225	1.13602		FN1	1.60888	1.33903	1.18136		ENO3	0.824664		PRDX4	0.602923		RIMS3	0.991733		TLR2	0.962486	0.942559		VCAM1	0.938204	1.14208		ST3GAL6	-0.856226	-0.866559		BCL6	0.712334		CD81	0.7096		PHLPP2	0.700839		ANKRD46	-0.593376	-0.611558		RANBP2	-1.14402	-2.01854		AKR1A1
	TYROBP	1.84071	1.878	0.915527		S100A8	1.58813	1.66791	1.53992		LRRC32	0.818111		TNFRSF10C	0.600339		PAIP1	0.984623		FHL2	0.955868	0.932952		GLYR1	0.932102	1.03718		ROCK2	-0.861323	-0.684345		DACT1	0.70823		APP	0.706653		APAF1	0.699917		SLC25A10	-0.591862	-0.819708		WSB1	-1.14122	-1.46317		SLC22A13
	VWF	1.81786	1.812	1.90793		CASP1	1.57355	1.40848	1.04132		FLI1	0.817185		E2F3	0.597392		EPCAM	0.972928		RPS21	0.954434	0.793463		JAG2	0.930117	0.701135		TRIB2	-0.972058	-1.8843		TLR1	0.700928		CAV2	0.70632		MYH11	0.698516		ID3	0.585253	0.762515		IL6ST	-1.13843	-1.84166		TUBAL3
	WFDC2	1.8085	1.745	1.73262		TYROBP	1.56663	1.63672	1.00429		TRPV2	0.809415		ADAM22	0.59001		UGDH	0.971788		TSPAN13	0.953978	0.686892		PROM1	0.930094	1.03749		CRHBP	-1.28054	-1.23419		GPM6A	0.698636		KRT18	0.704943		SMG6	0.698285		MSR1	0.587884	0.594214		MARCHF6	-1.12895	-1.65896		LGMN
	LY96	1.80552	1.14564	1.91779		CLU	1.55899	1.91027	0.902116		ITM2C	0.808632		BCL6	0.589192		MBOAT7	0.969263		LAMA2	0.948211	0.880268		FAS	0.927351	1.11262						MST4	0.697361		BGN	0.699502		PRKD2	0.695093		MACF1	0.595687	0.752659		GPR116	-1.11012	-0.943001		FMO4
	FCGR2B	1.80423	1.71808	1.70332		CD44	1.54793	1.73774	1.38334		KDELC1	0.800834		CTPS1	0.588375		RNF128	0.967356		CCL3	0.946564	0.730877		EPHB4	0.927065	1.20246						GPR65	0.692104		KRT8	0.697102		ZZEF1	0.694998		UCHL1	0.600908	0.747011		TOP1	-1.10587	-2.26545		TYRP1
	CCR2	1.79791	1.51483	1.57761		CTSZ	1.5291	0.930899	2.15595		MFGE8	0.800442		RNFT2	0.587966		PLS1	0.962745		LGALS1	0.946399	0.618582		GABBR1	0.925167	0.67666						ZKSCAN7	0.683069		CSGALNACT1	0.695087		NR1D1	0.693346		LCP2	0.602161	0.613908		SLC13A1	-1.09102	-1.5988		CTSB
	MEST	1.79473	1.57345	2.02878		CCND2	1.52788	1.42669	1.37239		ETV1	0.800315		FSTL3	0.585375		KCNJ16	0.962512		TNFRSF10B	0.912199	0.959463		DTL	0.915017	0.632798						ZBED8	0.682795		ITGB1	0.691545		APH1A	0.691206		AEBP1	0.603967	0.669145		WASL	-1.08208	-1.70969		SCD
	CPE	1.79182	1.71734	1.8031		COL3A1	1.52575	1.39999	0.773292		MSC	0.799148		BANK1	-0.585904		DNAJC12	0.960714		TNFRSF12A	0.911159	1.10591		COL4A1	0.913519	0.597024						FGG	0.680128		P2RX5-TAX1BP3	0.687474		GPA33	0.690356		RAB31	0.6058	0.914144		FERMT2	-1.08176	-1.38656		ACP5
	KRT19	1.78206	1.35078	1.5194		ARL4C	1.52008	1.66352	1.37149		MSX1	0.797731		PCF11	-0.593753		PPP6C	0.958534		HCLS1	0.908673	0.637088		ARHGEF6	0.903177	0.633005						RAP2B	0.678141		CKLF	0.686295		ZKSCAN5	0.68775		RFTN1	0.607567	0.696515		SECISBP2L	-1.0635	-2.09668		NAT8B
	GZMA	1.78039	1.30015	1.23031		IGJ	1.50724	2.30493	1.48862		WFDC1	0.793589		CORO2B	-0.595355		POLR2A	0.958291		EIF4E2	0.904513	0.596414		HHEX	0.89981	0.725154						HMHA1	0.678009		C3AR1	0.684677		MX2	0.68674		FLNA	0.608312	0.788837		PKP4	-1.05587	-1.71301
	CLU	1.78023	1.67557	1.59803		C1S	1.50613	1.63665	1.0777		APLNR	0.788981		RASGRP3	-0.606526		FCGBP	0.9578		C3AR1	0.889723	0.837838		REG1A	0.894678	0.751802						MAP4K4	0.667581		GUSBP11	0.684465		ENC1	0.684874		PFKP	0.608821	0.692749		CFLAR	-1.05446	-1.74229
	IL10RA	1.76591	1.53954	1.46267		THBS2	1.5046	1.46032	1.07687		SMCO4	0.786332		MAGEL2	-0.615008		RTN2	0.956629		RFTN1	0.880783	0.717454		ZCCHC24	0.889262	0.943399						KIAA1551	0.665825		FAM60A	0.681924		STAT4	0.682488		PLEKHO1	0.61224	0.603279		ACSL3	-1.05071	-1.70384
	HGF	1.74386	1.76231	1.67536		MARCKS	1.50338	1.46079	1.21966		ISG20	0.782293		KMO	-0.622836		PBXIP1	0.956026		BDNF	0.880381	0.728815		TYMS	0.888836	0.591021						PLA2G4C	0.660129		TPM2	0.675933		JAG2	0.682249		RAI2	0.617977	0.721745		SEC62	-1.03247	-1.89546
	IL33	1.71572	1.69383	1.67522		PLK2	1.50264	1.11192	0.996917		CCDC85B	0.778644		EDA	-0.627602		CTBP1	0.952846		TIMP1	0.8725	0.752637		TCF4	0.878951	-1.42152						PSMB8	0.655303		TNFRSF12A	0.67314		IGHG1	0.682008		RNASET2	0.624671	0.589736		RHOBTB3	-1.03107	-0.829947
	SCG5	1.71004	1.23522	1.18078		TRBC1	1.49187	1.51239	1.19724		TMEM45A	0.775495		MYO1C	-0.636885		RAB2A	0.950064		CSRP2	0.844925	0.827015		HNF1B	0.87326	0.97663						TP53	0.653697		PTRF	0.671789		AHI1	0.681423		FAM110B	0.625324	0.592237		COL4A3	-1.02875	-0.980832
	PID1	1.70964	1.75869	1.73713		MOXD1	1.48758	1.24816	1.20289		FABP4	0.772917		WT1-AS	-0.637405		PRSS16	0.947196		AOAH	0.842191	0.823291		GPX1	0.873044	0.982489						SP140L	0.652423		HLA-C	0.666928		HBBP1	0.680231		SOD2	0.626294	0.720435		TSC22D2	-1.02067	-1.04438
	ARL4C	1.70087	1.27417	1.46653		HOPX	1.48751	1.0432	1.05326		TRDV3	0.772734		RNF6	-0.638663		GAS2L1	0.945227		CTSK	0.831088	0.685193		PGLS	0.865047	1.2898						BLNK	0.646492		HLA-E	0.660782		CD38	0.680007		SLC2A10	0.629043	0.605687		KLF6	-1.01957	-0.884072
	UCP2	1.68382	1.17859	1.60742		TGFBI	1.48417	1.41245	1.08132		CDO1	0.772459		CASP8AP2	-0.645677		SRD5A1	0.943646		LILRA2	0.828445	0.742993		SH2B3	0.861379	0.718209						ITGB8	0.644612		ADAM10	0.654847		ZNF507	0.678426		CD37	0.631097	0.628835		UBXN4	-1.01931	-2.11385
	IGFBP6	1.67703	1.33111	0.978845		PYCARD	1.47941	1.22112	1.15858		TNFRSF21	0.770477		FGFR2	-0.649133		PGAP3	0.943641		SLC16A5	0.828421	0.920688		TRPC6	0.85838	-0.934294						ARHGEF40	0.644044		TGIF1	0.654036		PAX5	0.677787		ALOX5AP	0.634478	0.750858		SPIN1	-1.01751	-1.63008
	SYT11	1.67337	1.08655	1.2912		PLAC8	1.46485	0.926002	1.2896		AURKA	0.766575		PTPRO	-0.651084		SF3B4	0.940099		ITGB6	0.826763	0.789477		MICALL1	0.857901	0.906395						TPST1	0.641413		IFNGR1	0.653574		PHLDB1	0.677252		CAV1	0.635663	0.766514		KCNN2	-1.01391	-1.05501
	HS3ST1	1.67273	1.49141	1.27267		PTPRC	1.45795	1.39848	0.964307		PROCR	0.765443		POLD3	-0.65191		PCP4	0.92745		FAM105A	0.82403	0.767755		LBR	0.853992	1.51344						TAP1	0.640901		PERP	0.646036		KCNJ5	0.676068		NRP1	0.63711	0.835856		PROSC	-0.997832	-1.44387
	PTPRC	1.66742	1.19219	1.25634		IGHM	1.45671	1.49186	1.20179		EZH2	0.762798		ARHGAP5	-0.694522		GALNT7	0.925288		RPL27A	0.817975	0.982048		SEMA3F	0.853619	1.19367						ACKR4	0.640251		FAS	0.643791		AFF2	0.675428		MPZL2	0.637646	0.630971		PLCE1	-0.991618	-0.621069
	AEBP1	1.65241	1.4595	1.34325		TPSAB1	1.45322	1.34172	1.22863		SMAGP	0.755584		ZCCHC14	-0.70436		CDK19	0.921846		ATP8A2	0.817637	0.71326		TOR4A	0.84953	0.801558						LIPA	0.639745		CHSY1	0.640962		SMARCD3	0.67353		LPGAT1	0.64012	0.606144		AKAP2	-0.98732	-1.13608
	PYCARD	1.62708	1.33462	0.834011		TNFAIP8	1.45049	0.722685	0.650731		MINOS1-NBL1	0.754337		LTK	-0.708489		SH3BP4	0.919987		ATRNL1	0.810477	0.826065		RAPGEF5	0.849139	0.799651						SYT11	0.638005		CLDN7	0.633931		MED16	0.672395		ESYT1	0.642421	0.63912		DEFB1	-0.980376	-0.669028
	LYPD1	1.6226	1.13905	1.51394		CD48	1.42915	1.35441	1.32147		SERPINH1	0.750599		NCOA2	-0.724267		ORAI3	0.917932		ARHGAP15	0.795614	0.944428		CLEC11A	0.841651	0.939463						ELF4	0.629297		COL16A1	0.630944		NSG1	0.671298		CD47	0.645911	0.766549		TBC1D8B	-0.973873	-0.659583
	MCAM	1.60805	1.01095	1.02037		EVI2A	1.42574	1.30639	1.11571		TRIM38	0.745189		NAP1L2	-0.733755		CRYBG3	0.917589		PPP1R14B	0.788311	0.591951		MYBL1	0.840226	1.03868						TRAF3IP3	0.628749		NUAK1	0.629148		TLE2	0.670818		GBP2	0.64858	0.926452		GABARAPL1	-0.97121	-0.986574
	PDE1A	1.59906	1.64167	1.79328		TPSB2	1.42203	1.22003	1.10048		NBL1	0.742923		DBP	-0.736686		KLRB1	0.915804		GM2A	0.785505	0.740073		PIK3C2B	0.840184	1.02848						FAM186A	0.627482		ACTR3	0.625581		LRRC32	0.664778		CD24	0.650291	1.0532		IGFBP4	-0.963773	-1.07994
	LAMA4	1.59735	1.32606	1.42674		LCN2	1.42019	1.40706	1.45137		LAGE3	0.742675		KIAA0101	-0.745068		RAD51D	0.911757		SYNGR1	0.784192	0.772371		CTSC	0.837852	1.2083						INHBA	0.626887		STAT1	0.62509		FXYD3	0.664521		AXL	0.665467	1.07329		SLC16A10	-0.961393	-1.06391
	SPON1	1.59614	1.47911	1.55031		TESC	1.41258	1.31918	1.32976		C2	0.733651		NIPSNAP3B	-0.801611		SF1	0.908255		CLEC7A	0.781375	0.705836		PTP4A3	0.836633	1.20804						C4A	0.625936		TMEM123	0.623747		PSG7	0.663283		SELPLG	0.669455	0.645028		DLST	-0.960893	-0.947351
	PLAU	1.59135	1.56032	1.40575		IFI16	1.40765	1.45212	1.22866		COL7A1	0.729265		NBPF10	-0.905373		ATP5I	0.906942		MRC2	0.781287	0.888576		VTCN1	0.83438	0.928047						GNG11	0.625918		TLR2	0.623451		ZYX	0.663134		ATAD2B	0.671728	0.640564		TPPP3	-0.958791	-0.835391
	ITGB2	1.58748	1.37317	0.712202		QPCT	1.40442	0.870237	0.746507		CADM1	0.725109		EHD3	-0.951862		ZNF137P	0.906777		RERGL	0.774203	0.59614		SLC1A4	0.834349	0.658077						LMCD1	0.625368		GPR126	0.622915		IDUA	0.661924		HLA-F	0.676312	0.64427		DDX17	-0.957019	-1.77879
	TRBC1	1.57857	1.1914	1.20758		SPON1	1.38881	0.962542	0.881976		CYP24A1	0.722798					DENND1C	0.905142		UCHL1	0.761546	1.20575		DHRS2	0.834297	0.984358						FCGR3B	0.620527		S100A14	0.622883		GTDC1	0.661444		DCK	0.678428	0.671808		EIF1AX	-0.934356	-1.47661
	CD163	1.57612	1.75445	1.59123		POSTN	1.35835	1.44018	1.03101		GMFG	0.722285					ZMIZ1	0.903466		FKBP11	0.756485	0.669919		TRIB3	0.82825	0.792522						ENOX1	0.618049		CSF1R	0.620445		SEMA4F	0.658798		CPVL	0.68062	0.737754		CSPP1	-0.932688	-1.56358
	ADH1B	1.57509	1.57615	1.57528		RAC2	1.34329	1.14541	1.08016		TRIM9	0.720403					FAM134A	0.89909		MYL6B	0.753576	0.737594		WSCD1	0.82334	0.781509						TRAM2	0.6168		PTPRN2	0.619467		LTBP2	0.6584		HCK	0.680626	0.636041		CAT	-0.929102	-1.29261
	RNASE6	1.57274	1.7821	1.63821		SPON2	1.34319	1.14121	1.03712		NT5DC2	0.717444					STK32B	0.898917		SAMSN1	0.747081	1.09397		TMC6	0.8218	0.849049						APOBEC3B	0.616561		EFNB2	0.615777		C4BPA	0.657501		TCF4	0.68869	0.764185		DICER1	-0.919087	-1.86716
	IGLV1-44	1.56053	1.70404	1.47217		CCL5	1.3353	1.01454	1.25695		PPIB	0.715984					LAMB1	0.897004		LGALS3	0.746691	1.02517		TUBA1A	0.816791	0.751371						PRR5L	0.616253		IRF1	0.615555		PGAP3	0.657373		ASNS	0.690455	0.684579		DACH1	-0.914291	-0.795127
	KRT7	1.55857	1.31281	0.968977		CRIP1	1.31848	1.17035	1.22225		PCDH12	0.714698					PPIF	0.892724		OSBPL3	0.735283	0.677683		B4GALT5	0.807728	0.923234						LXN	0.615694		TNFAIP3	0.614524		FAM65B	0.656616		MGP	0.6932	1.20343		MT1F	-0.910659	-0.729256
	SPON2	1.54993	1.0073	1.41518		LAPTM5	1.31188	1.65442	0.999365		HSPG2	0.714255					TELO2	0.890309		TESC	0.725464	0.712125		IL27RA	0.801903	0.702181						GALNT1	0.615531		HTATIP2	0.613991		MALT1	0.65656		MID1	0.69347	0.767006		PLXDC2	-0.906246	-2.05803
	RET	1.53395	1.09592	0.796992		HLA-DPA1	1.31047	1.76539	0.747237		HLA-DMB	0.712915					CD69	0.888622		CYTIP	0.720413	0.896761		RABEP2	0.800098	0.763462						ALDH1A3	0.614524		YBX3	0.605955		RUNX3	0.656495		CD97	0.695157	0.657294		TPR	-0.905643	-2.14414
	TRAF3IP3	1.52681	1.13519	1.49008		HLA-DQB1	1.30388	1.17668	0.851483		PBK	0.712616					TCF7L1	0.88635		EMILIN1	0.718572	0.591017		LAMP5	0.798566	1.28996						COL5A2	0.614194		MTHFD2	0.604477		PML	0.655715		STK17A	0.696673	0.640793		GOLIM4	-0.905627	-1.24997
	THBD	1.52507	0.803731	0.87345		TSPAN8	1.30291	1.02391	0.738942		TP53	0.706954					PRR5	0.886029		SYNC	0.718275	0.646838		LSM7	0.79629	0.636072						GZMB	0.613871		GLUL	0.604043		T	0.655469		DOCK2	0.698861	0.660544		SLC5A3	-0.899293	-1.52541
	NEFL	1.52325	1.43032	1.20216		MNDA	1.29981	1.08233	0.99327		HN1	0.705637					STC1	0.883066		GMPR	0.710712	0.590453		MXRA5	0.79423	1.18373						MFNG	0.612545		TRAM1	0.602152		LOC102723479	0.655239		S100A6	0.701611	1.04566		IGF1R	-0.895786	-1.41052
	CFH	1.51669	0.848009	1.48366		FAM129A	1.29846	1.00518	1.05346		LILRA1	0.70269					SORL1	0.882249		RPS19	0.707995	0.737216		CSTF2T	0.791957	1.04206						HIST1H2BK	0.612196		PTMA	0.601679		SPARCL1	0.654429		TOX	0.701631	0.586221		KLHDC10	-0.894664	-1.51452
	IGK	1.50849	1.60376	1.51272		HS3ST1	1.29744	1.20463	0.750719		KCNJ2	0.702316					DDAH1	0.88137		UBL5	0.699688	0.754091		MELK	0.781203	0.592843						STS	0.611766		HDGFRP3	0.601643		HRH2	0.653635		COL14A1	0.706874	0.68277		SLC13A2	-0.894163	-0.865865
	CCR1	1.50783	1.20668	1.37929		CD53	1.29582	1.22432	1.07231		SFXN3	0.701609					GATAD2A	0.873535		PILRA	0.694477	0.718681		ACKR4	0.780866	0.5945						PTEN	0.609915		DNASE1L3	0.600096		GRM6	0.653344		HLA-B	0.707359	0.74994		ENPEP	-0.892217	-1.3313
	LAPTM5	1.5025	1.21649	1.56503		LUM	1.29272	2.07898	0.734051		ABCC10	0.698486					ZNF512B	0.872209		ADORA2A	0.69388	0.5992		IRAK1	0.780344	0.868508						NID2	0.608653		VCL	0.595561		FSD1	0.652666		FMO3	0.712414	0.972672		TTC3	-0.878008	-1.88367
	CSTA	1.49436	1.48556	1.56188		COL4A1	1.27932	1.08816	0.837504		TP53I3	0.697955					ESR1	0.872209		LZTS1	0.692868	0.599086		TNFAIP2	0.777282	0.791371						IQCA1	0.608161		EDNRB	0.59431		ACRV1	0.652084		BIRC3	0.713998	0.93038		METTL7A	-0.876828	-1.25923
	MUC1	1.49337	1.85714	1.946		CCL2	1.27918	1.20505	0.85369		ANKRD2	0.696372					STK39	0.872146		SLIT3	0.69163	0.592764		IMPDH2	0.776723	1.06194						CST7	0.605029		CD55	0.590449		RHBDF1	0.650496		OSMR	0.717317	0.745847		TNPO1	-0.875631	-1.76468
	GLIPR1	1.48856	1.38146	0.95395		CORO1A	1.26584	1.10236	1.02268		UNC5B	0.694027					ENPP2	0.871237		PTEN	0.690949	0.603142		PECAM1	0.774312	-1.01083						HCP5	0.601401		PAPSS2	0.590408		TP53I11	0.650365		IL7R	0.72017	0.876933		SRRM2	-0.873327	-1.56762
	MMP7	1.4882	1.39456	1.71266		TMSB10	1.26521	1.1989	0.86407		PGF	0.692431					NF2	0.870897		CASP8	0.686549	0.659641		MYRF	0.774073	1.0612						PARP8	0.598163		BST2	0.590311		AAGAB	0.650249		HLA-DMB	0.724535	0.772675		DNAJB1	-0.873231	-0.940703
	CD53	1.48671	1.3711	0.715359		ELK3	1.26521	1.16143	0.938939		BTK	0.690816					EIF4E	0.865736		BASP1	0.685336	0.766951		ENC1	0.77383	-2.08933						SIM2	0.596338		ARPC5	0.589142		FBLN1	0.649434		MEIS2	0.729842	0.602128		YWHAE	-0.869025	-0.765258
	PLA2G4A	1.48564	1.5376	0.99464		PAPPA2	1.25587	1.34849	1.24915		TEAD4	0.686861					UBA52	0.863814		RPL36	0.684861	0.672357		HMHA1	0.773486	0.759689						IFI27	0.596083		PLOD2	0.586653		GPR15	0.648731		DSE	0.737329	0.826637		SCAMP1	-0.867147	-1.38771
	EVI2A	1.48135	1.43996	1.26404		CHODL	1.2466	0.911746	0.976492		FSCN1	0.685292					ATF6B	0.862697		CST7	0.680628	0.63977		COL4A2	0.772612	-0.655666						BRINP1	0.595355		DNAH3	0.586398		RHOD	0.648274		HN1	0.73955	0.654384		PRRG4	-0.863028	-1.20227
	HRH1	1.4764	1.51726	2.03514		CSTA	1.24643	1.18536	1.00124		PDGFRL	0.684146					ATG9A	0.862399		RCN1	0.675572	0.611918		RHBDF1	0.771844	0.857178						PRKCB	0.592924		ALDH2	-0.586799		CTSE	0.647596		PSMB10	0.746254	0.818947		ARSE	-0.858744	-0.890596
	KDELR3	1.47297	1.0821	0.751256		CAPN6	1.23983	0.92874	0.747315		CDH2	0.684123					DLG3	0.862309		CORO1C	0.667041	0.596191		STOML1	0.771039	0.775663						MANSC1	0.590509		NUDT6	-0.588907		HIST1H3E	0.646725		ADCY7	0.74728	0.615692		SLC17A1	-0.852343	-1.08073
	LEF1	1.46881	1.5036	1.61924		FHL2	1.23099	1.32989	0.916623		CACNA1C	0.682973					PDE8A	0.861292		NADK	0.665602	0.589555		NPY1R	0.768084	0.863397						SP110	0.590365		NAGLU	-0.593128		ZNF277	0.645745		YWHAH	0.751858	0.956175		IDH2	-0.849756	-1.00024
	PTX3	1.46787	1.02893	0.982425		VIM	1.23073	1.47283	0.634969		SLCO3A1	0.682715					CNTNAP1	0.860582		CD1D	0.661501	0.619806		RHOBTB1	0.766641	0.736002						TNFSF15	0.59015		FBXL5	-0.593875		SLC27A3	0.645404		PTGS2	0.757176	0.595772		CLCN5	-0.848772	-1.35396
	P2RY13	1.46479	1.27061	1.39238		CTSS	1.22907	1.27602	0.754035		OLFML1	0.682471					AKR7A2	0.858571		NUP43	0.653416	0.620027		ANGPTL2	0.765254	0.717203						MDK	0.588632		ACAT1	-0.594153		VGLL1	0.643579		S100A10	0.759736	0.752801		AHCYL1	-0.84553	-1.22211
	FCER1A	1.4626	1.38703	1.29774		ACTN1	1.22472	1.4454	0.842478		CSTB	0.68096					SRRM1	0.858536		SEPTIN6	0.65085	0.719689		NREP	0.754041	0.774059						ISG15	0.586488		ECSIT	-0.596445		HLA-DOB	0.643099		GIMAP6	0.76155	0.729561		SRP72	-0.842267	-1.66673
	MMP2	1.45647	1.11771	1.35107		COL6A3	1.21528	1.04396	0.874196		SCARA3	0.679047					SIDT2	0.854212		TFAP2B	0.646137	0.735013		CCNA2	0.752868	0.751527						CENPU	0.585776		SGK2	-0.596777		ENO1	0.641146		GMFG	0.762425	0.910131		AKAP13	-0.83928	-0.72172
	TLR7	1.44594	1.04496	1.15374		IL10RA	1.21363	0.913021	1.18364		TOP2A	0.674035					CDK12	0.852816		CHPF2	0.641204	0.594961		APOBEC3B	0.752326	0.617479						AP1S2	0.585599		PDSS1	-0.604291		CASQ2	0.639165		CD74	0.762465	0.916819		THUMPD1	-0.838202	-1.75323
	RAC2	1.44326	1.09294	0.992619		CSF2RB	1.21083	0.944732	1.14456		FGR	0.672889					ERBB2	0.852452		FAM189A2	0.638862	0.664454		BAI2	0.750903	0.651291						ST3GAL6	-0.586158		MOCS1	-0.606721		OR2N1P	0.639027		BHLHE41	0.779213	0.613322		PDZD2	-0.836406	-0.861382
	NCF2	1.44135	1.27478	1.09989		COL1A1	1.18941	0.941142	0.792812		TM4SF1	0.670152					DPAGT1	0.852244		NMT2	0.636336	0.739601		CLC	0.747825	0.695434						SZRD1	-0.586756		FAM46C	-0.609373		WDTC1	0.63873		DYRK2	0.780339	0.591277		CPNE3	-0.834874	-1.3996
	HDAC9	1.43733	0.739654	1.15639		KLRB1	1.17643	0.883013	1.14291		EHBP1L1	0.668258					ERBB4	0.848416		BIRC3	0.635548	0.721602		AGTR1	0.746695	-0.69763						OGDH	-0.586811		DLEU1	-0.612437		LHX6	0.636084		AKAP12	0.785391	1.69732		GLG1	-0.83351	-1.39663
	PXDN	1.42979	0.64275	1.1396		MYOF	1.17289	1.55049	0.776891		SERP1	0.666798					TCF12	0.848061		GUSBP11	0.634768	0.73254		HEY2	0.746066	0.690958						FOXI1	-0.588041		MYOM2	-0.629662		IL2RA	0.635477		GPM6B	0.788787	0.697584		TUBG1	-0.830421	-1.0293
	IGJ	1.42907	1.72712	1.30354		ADAMTS1	1.17009	1.19694	0.783201		SPATS2	0.665161					DSP	0.847728		SLC12A8	0.63453	0.6482		CLDN1	0.744791	0.690082						BAG3	-0.595675		DLGAP2	-0.630069		EDA2R	0.635352		GALNT7	0.79196	0.675426		CALB1	-0.823595	-0.604276
	SERPINE2	1.42684	0.943567	1.59393		UCP2	1.14744	0.865585	0.796529		FAR2	0.66464					GLCE	0.846639		TRO	0.619359	0.601605		APOBEC3F	0.741104	0.683537						PLXNA2	-0.604315		CYP46A1	-0.634707		CHFR	0.635105		TRAC	0.801341	0.683635		NRIP1	-0.823096	-1.68499
	ITGA4	1.4176	1.04714	1.10214		SEL1L3	1.14636	0.869903	0.710943		QPCT	0.664351					JUND	0.844976		PFKP	0.617262	0.892686		CD37	0.738971	0.587059						MT2A	-0.61165		STC2	-0.636367		MAP1A	0.634161		GNAI1	0.806681	0.834416		SH3BP5	-0.822855	-1.03842
	SERPINA3	1.41461	1.22299	1.22659		HLA-DPB1	1.14565	1.31896	0.804895		CCDC69	0.663387					FAM193A	0.844313		ITGA1	0.608375	0.722995		IRF7	0.738839	0.63314						DHRS3	-0.613513		CIDEB	-0.640203		PCSK6	0.633945		FBN1	0.80779	0.604661		WIPI1	-0.821667	-0.961133
	CFB	1.41074	1.00728	1.12968		TPM1	1.14208	1.26032	0.731764		KCNAB1	0.662473					MAGED4	0.843685		SUSD5	0.605811	0.610794		HMMR	0.735155	0.815774						EPHX1	-0.613921		RPP14	-0.644822		PDLIM4	0.633493		CXCL12	0.811628	0.974536		HMGCS1	-0.820821	-0.68332
	COL5A1	1.41028	1.14813	1.35475		LY75	1.14182	1.02062	0.889085		APOBEC3A	0.661877					RAP1GAP	0.836292		SCARB1	0.604055	0.64971		SHC2	0.735154	0.682945						SLC22A5	-0.614443		ASL	-0.64552		CDCP1	0.63244		ARHGAP15	0.816527	0.887631		ZC3H15	-0.816964	-1.69073
	CCL19	1.40719	1.32407	1.29375		RNASE6	1.139	1.54045	1.07376		ARHGEF15	0.661305					EPB41L1	0.836098		FJX1	0.599777	0.877339		PTTG1	0.733985	0.773906						GATA6	-0.614671		NMRK1	-0.659533		FOXP3	0.632384		MEF2C	0.818104	0.85673		ID2	-0.811582	-0.626411
	CSF1R	1.39842	1.25677	1.04191		MEST	1.13745	1.11186	0.884558		SPRY1	0.659964					MDC1	0.83565		DDB2	0.598847	0.68411		ST14	0.732944	0.654728						ROGDI	-0.617266		SLC12A6	-0.660773		TMPRSS11D	0.631868		PNMA2	0.836526	0.969831		ATP6V1B1	-0.810686	-0.609998
	ANO1	1.39731	0.896659	0.872979		NOV	1.13604	1.03857	0.941574		CAPG	0.658373					CARS	0.835057		NUAK1	0.58831	0.666476		FCGR2C	0.731756	0.589427						POR	-0.61798		SPAG5	-0.664595		NPY5R	0.631743		RGS10	0.839944	0.947927		TCF25	-0.809234	-1.54652
	TUBB2B	1.38984	1.32838	1.23903		PECAM1	1.1353	1.23701	0.947159		TYMP	0.655774					HMGA2	0.833379		SMPDL3A	-0.589477	-0.621809		GPM6A	0.729904	0.643328						SPSB1	-0.618322		HPN	-0.666991		DLK2	0.631128		RNASE1	0.852794	1.00624		GOSR2	-0.807464	-0.97615
	SLPI	1.3898	1.26497	1.85231		MS4A6A	1.13374	0.868187	0.963759		GFER	0.65558					EPB41L3	0.832663		MAPT	-0.593658	-0.659847		NRCAM	0.727528	0.858356						PTP4A1	-0.619675		UGT2B28	-0.667817		EFNA5	0.630521		ARHGDIB	0.857011	1.18535		VDR	-0.807321	-0.876796
	CCND2	1.37335	1.34646	0.75033		KRT19	1.13152	1.29568	0.872923		FBLN2	0.65555					PACS2	0.832392		TULP4	-0.598961	-0.825489		LHFPL2	0.726231	0.666703						IGF1	-0.620062		SARDH	-0.673897		TCL1A	0.628944		S100A4	0.872578	0.870213		NDUFB7	-0.806048	-1.30528
	LCK	1.36806	1.03025	1.08085		IGLL3P	1.12879	1.29795	1.05969		CASP4	0.651016					SLC6A8	0.832215		TSPYL4	-0.608047	-0.675515		TNFRSF25	0.726206	0.695646						MRPS15	-0.625432		TRHDE	-0.675433		GIMAP1-GIMAP5	0.628848		ARPC1B	0.873553	1.04089		AP3D1	-0.805595	-1.52346
	VCAN	1.36788	1.62035	1.62061		ITGB2	1.11925	1.06442	1.03914		SSPN	0.650035					HLA-DOB	0.831644		ANKRD46	-0.623728	-0.641942		EFS	0.725211	1.21365						FZD5	-0.626774		DBP	-0.676871		CDH7	0.628434		IRF8	0.877625	1.13508		RUNDC3B	-0.800408	-1.01786
	FBN1	1.36195	0.919409	1.4243		IGLL5	1.11903	0.903134	1.32903		LEPREL4	0.648922					SDC1	0.831374		SYNJ2	-0.634906	-0.680891		CCNB2	0.723436	0.785282						KLK7	-0.629039		IL17RB	-0.684388		ITGA3	0.628287		LGALS1	0.892074	0.844024		HSP90AA1	-0.795643	-1.63815
	HOPX	1.35774	0.995916	0.790355		COL15A1	1.11645	0.873022	0.788596		MICA	0.647799					SDC3	0.829342		SERPIND1	-0.653231	-1.04052		IL2RB	0.721803	0.898804						CREM	-0.629821		ECHDC3	-0.688407		OBSL1	0.627047		FGL2	0.897188	1.56729		SH3YL1	-0.794746	-0.653579
	CDH6	1.35666	1	1.59609		CDH6	1.11619	0.983892	0.65348		RPL13	0.647571					SCGN	0.825002		HLF	-0.656945	-0.679299		ELF4	0.720052	0.75175						SSR3	-0.629995		SERPINC1	-0.690256		CADM3	0.626782		LPCAT1	0.903898	0.603549		TROVE2	-0.790262	-1.64696
	GZMK	1.35438	1.15684	1.35958		CDH3	1.11572	0.828318	1.03576		NMI	0.645429					TXN	0.824612		TCL6	-0.669552	-0.717882		ARPC2	0.719655	-0.709681						GDF15	-0.632135		COTL1	-0.692726		RET	0.625661		TUSC3	0.916002	1.22369		HIPK3	-0.790099	-0.666287
	MRC1	1.35436	1.47761	1.86461		S100A2	1.11064	1.47204	0.835396		A2M	0.644782					UPK1B	0.818889		RRAGD	-0.679387	-0.646173		GPRC5B	0.718447	0.684254						STRA6	-0.633354		LIPC	-0.709846		RASGRF1	0.625631		C1QA	0.933452	1.26243		DBT	-0.788108	-1.65132
	VEGFC	1.35432	0.891446	0.769375		CFB	1.10519	1.12422	-0.640247		NME1-NME2	0.644425					NUDCD3	0.818219		NR3C2	-0.689276	-0.637231		ERAP1	0.718187	-0.816607						MLF2	-0.635246		ATP6V0E2	-0.711955		MT4	0.624508		TSPAN13	0.93412	1.07154		CYFIP2	-0.780478	-0.706834
	NLGN4X	1.3434	1.14777	1.04971		ITM2C	1.10349	1.26709	1.1269		FANCI	0.644259					PIK3C2A	0.818188		ADH6	-0.740386	-0.741925		TMEM258	0.716314	0.885234						NR4A3	-0.63765		ATP6V1B2	-0.717517		ITSN2	0.623922		PLSCR1	0.936724	1.21596		ZBTB20	-0.77919	-1.51541
	MST4	1.34191	1.70558	0.962563		SOX9	1.10014	1.43494	1.20888		GSK3B	0.641658					MBD3	0.815994		FAM65B	-0.750406	-0.731241		DOK2	0.714568	0.764559						SEMA3G	-0.644378		AMT	-0.718594		ENTPD3	0.622207		HLA-DRA	0.955581	1.1409		MUT	-0.776709	-1.25938
	BHLHE41	1.34171	0.9608	1.65303		TNMD	1.0999	1.02992	0.604993		IGSF3	0.640484					SPCS3	0.813489		TSPYL5	-0.768871	-0.729532		ZSCAN16	0.712186	0.715883						GSTM3	-0.647016		PCYT2	-0.724604		MCF2L	0.621517		CLEC2B	0.958298	0.875086		PTER	-0.775959	-1.51848
	MSR1	1.33485	1.37312	1.11119		FHL1	1.09146	1.24385	0.890782		HOXD11	0.640015					CASR	0.811489		KCTD3	-0.771339	-0.655371		SAC3D1	0.710651	0.610998						IGFBP3	-0.650969		ARSF	-0.741052		DTX2P1-UPK3BP1-PMS2P11	0.621207		CLDN3	0.963402	1.12955		THSD7A	-0.772609	-0.824689
	AGR2	1.33234	1.32121	1.44971		ANXA3	1.09089	1.18316	0.657198		FUT1	0.63673					SPSB3	0.811229		EGFL6	-0.785718	-0.795138		CCND1	0.707793	-0.923973						GCLM	-0.656193		SLC26A4	-0.772859		WISP1	0.620853		VCAM1	1.01354	1.05988		VAMP2	-0.769043	-0.609687
	CALHM2	1.32888	0.759746	0.84139		FXYD5	1.07888	0.691299	1.23564		TRAC	0.636548					IRF6	0.811073		CPNE6	-0.786935	-0.597242		TMSB10	0.705323	0.597009						CDA	-0.656747		TCL6	-0.781145		BMP6	0.620464		ANXA2	1.01838	1.54921		AP1AR	-0.768565	-0.856827
	AHNAK2	1.32301	1.14634	1.39403		DKK3	1.07538	1.15376	0.806842		ENAH	0.636329					URB1	0.810573		PTH1R	-0.794179	-0.825727		DLGAP5	0.699343	0.655234						ESM1	-0.665017		RENBP	-0.798059		OXTR	0.619476		THBS1	1.03997	0.634205		MLEC	-0.764307	-1.7423
	SFRP1	1.32266	1.567	1.54293		S100A11	1.07448	0.997342	0.861724		SOX18	0.6363					TCF7L2	0.810392		TACC2	-0.832378	-0.768406		MET	0.697552	0.82917						PEMT	-0.667789		NR1I3	-0.910792		NRGN	0.619278		C1R	1.05688	1.25573		FXR1	-0.763889	-1.64495
	DACT1	1.32186	1.01931	1.13977		IFITM1	1.07238	1.10906	0.796334		UTP14A	0.631853					CHST3	0.810142		MPP5	-0.842847	-0.963421		EFEMP2	0.693635	0.893413						ERF	-0.668629		SLC7A8	-1.16545		LPXN	0.618706		TNFRSF11B	1.08956	0.801864		NEDD4L	-0.763286	-0.822745
	COL11A1	1.31361	1.14406	1.24363		LTB	1.06836	1.09	0.588528		FADS3	0.629462					UBP1	0.809506		SIRPA	-0.872972	-0.61516		DCHS1	0.693511	0.847098						SLC39A14	-0.671205					PRAMEF1	0.617369		HTR2B	1.14772	0.788138		YIPF6	-0.753868	-1.45575
	ZBED2	1.30953	0.917711	1.11784		SFN	1.06435	0.802569	1.10629		BUB1B	0.628714					EPS15L1	0.807923		CCDC91	-0.909487	-0.604005		HN1L	0.692855	0.781197						NES	-0.673211					OAS2	0.616862		TUBA1A	1.21895	1.3942		INSR	-0.750264	-1.11372
	FCGR1B	1.30611	1.06177	1.16918		PSMB9	1.0516	0.736266	0.683625		VOPP1	0.628446					RBBP6	0.807566		KBTBD11	-0.955007	-0.877226		SYNCRIP	0.691586	-1.37749						SERPINE1	-0.675846					OR10H3	0.615988		HAVCR1	1.24724	1.04631		ARL5A	-0.747252	-1.06169
	LYN	1.30296	0.974741	1.18165		PFKFB3	1.0516	1.03643	0.962961		KCTD14	0.62795					NCOR1	0.8073		SHANK2	-0.965166	-0.646129		GBAP1	0.691188	0.722176						KLK6	-0.687218					FAM171A1	0.615959		SOX4	1.36891	1.17741		FGF9	-0.74641	-1.0167
	COL16A1	1.30187	1.17222	0.645655		GZMA	1.05128	0.884996	0.713689		RBP1	0.627633					EMC6	0.807231		GHR	-1.00931	-0.794855		GZMH	0.690396	0.588696						NFASC	-0.687561					PSG1	0.615556		HLA-DQA1	1.39062	1.70321		CA12	-0.742144	-0.947971
	TMSB15A	1.29693	0.789754	0.893937		COL4A2	1.04758	0.803651	0.850252		SEPTIN4	0.626802					ZNF444	0.80574		SLC6A2	-1.08052	-1.06055		ABCG1	0.68975	0.601623						CTPS1	-0.687584					RHAG	0.615014						RAD23A	-0.741293	-0.817021
	IGFBP3	1.29337	1.46178	1.21328		CXCL1	1.04602	0.801201	0.952703		IRF1	0.626434					CDC42BPB	0.803399		DDC	-1.25198	-0.874959		NADSYN1	0.689406	0.782293						TYRO3	-0.691158					PDE7B	0.614097						RASSF4	-0.74121	-1.3909
	CHST15	1.292	1.38425	1.63849		LHFP	1.04598	1.33465	0.823487		SEC24D	0.625918					CHD3	0.803019		PAH	-1.31742	-0.858425		CSK	0.689376	0.885906						UBE2M	-0.700218					TRIM29	0.613082						ATRX	-0.740213	-1.68052
	LAMC2	1.28511	0.999531	1.34135		ANXA2P2	1.03818	1.09802	0.887061		TSPO	0.625865					FBXO46	0.802534		SLC5A12	-1.33317	-0.82533		GPR124	0.688293	0.632466						NFKBIA	-0.700543					CCL13	0.612817						RXRA	-0.738596	-0.722545
	CYBB	1.28341	0.852466	0.915225		TRIM22	1.03744	1.39943	0.662249		CACNB3	0.625323					UBAP2	0.801792						RRP8	0.68693	0.66622						SLC16A1	-0.713887					UBE2C	0.611963						PURA	-0.737957	-1.23133
	CPVL	1.28156	1.18336	1.26896		CCL21	1.03667	0.981131	0.837863		ADAM10	0.624364					BSPRY	0.800784						TMPRSS3	0.686105	0.63101						MAGI2	-0.71482					SF3A2	0.611055						LUC7L3	-0.737793	-2.06889
	TNFRSF1B	1.28045	0.991662	0.948534		SLCO3A1	1.02948	0.756898	0.820719		MFNG	0.623943					TFCP2L1	0.800514						KANK3	0.685911	0.588316						CHN2	-0.716101					CDX1	0.610682						FOXO4	-0.737677	-0.98276
	TNC	1.27634	1.07566	1.33568		CHST15	1.02493	0.941602	0.748673		MEF2A	0.623186					SARS2	0.80041						GBP1	0.685356	-0.858563						RREB1	-0.716847					SEC14L5	0.610153						PICALM	-0.735541	-1.38868
	F13A1	1.27577	1.03073	1.36857		MCAM	1.02486	0.799838	1.07854		KAL1	0.622577					KPNA4	0.798295						CDK1	0.683579	0.691878						LRRC2	-0.719151					MAP7D3	0.609852						GOT1	-0.735224	-0.827011
	CCL2	1.27547	1.26543	0.827946		SERPING1	1.01944	1.27163	0.606668		RHBDF2	0.622134					RAB15	0.798237						PTGES	0.682623	1.05522						KCNH6	-0.721687					TBC1D2B	0.609149						HGD	-0.734836	-1.03564
	RTN1	1.26655	1.33409	1.01278		SLC34A2	1.01811	0.759397	1.04028		HSPBAP1	0.621779					CNPPD1	0.798116						PLXND1	0.6819	0.726882						CEBPD	-0.723729					ADRBK1	0.608647						PRRC2C	-0.734448	-1.47159
	COL14A1	1.26597	1.24309	1.3879		CRIP2	1.01544	0.754486	0.897482		CCNB1	0.621612					ZBTB18	0.798094						TPST1	0.681427	0.613061						MCL1	-0.724037					KRT2	0.608194						ANK3	-0.733924	-1.5352
	PTN	1.26027	1.27889	0.976392		LAMC2	1.01368	0.838292	0.783802		PSRC1	0.620579					RNMTL1	0.79567						SLC15A2	0.681139	0.721787						MT1H	-0.728128					LOC220077	0.608162						PPAP2B	-0.733511	-1.26417
	FCER1G	1.25388	1.00077	0.885141		MS4A4A	1.01356	1.37241	0.631946		GCNT3	0.620569					CRAT	0.793724						EMR1	0.676969	0.592489						SH3BP2	-0.728991					RAB26	0.607375						NDUFS1	-0.729839	-1.02606
	ITGAM	1.24848	1.39016	1.19893		PDLIM1	1.00815	0.823884	0.742724		NOC3L	0.61847					ADAP1	0.792548						KLRF1	0.675901	0.692247						TFRC	-0.729647					GPRC5D	0.607039						STK16	-0.729082	-0.627056
	CD97	1.24747	0.674607	0.769673		SAMSN1	1.00526	0.747492	0.626168		MMD	0.618227					BCHE	0.791263						SKP2	0.672051	0.603382						ACACB	-0.731704					GSTM5	0.60629						TRAK2	-0.72669	-1.45626
	CD48	1.24177	1.02639	0.925898		CLEC10A	1.00479	0.878175	0.764179		JAM2	0.618128					SUN1	0.7905						PLCB1	0.669713	1.15861						TACC2	-0.734513					SLC12A4	0.605013						SLC25A32	-0.722269	-0.807091
	SELPLG	1.24148	1.12815	1.37133		C1QB	1.00471	1.4509	0.619882		GPSM2	0.617863					MTCL1	0.789884						IPO4	0.6697	1.14756						TOB1	-0.737451					CYP1A2	0.604418						DDX24	-0.721865	-1.29221
	FCGR2A	1.23906	1.25373	0.849909		IL27RA	1.00326	0.684385	0.615073		CRTAM	0.617233					LACTB2	0.789529						PARVB	0.669631	1.19789						HSPA6	-0.737617					RASL10A	0.604195						CDC14B	-0.72177	-1.24419
	GPR64	1.23762	1.13683	1.25256		CLC	1.00182	0.805543	0.898392		CSGALNACT1	0.617064					STAT5A	0.78632						SPHK1	0.669178	0.677199						TNFRSF21	-0.738383					CTSG	0.603973						SCAF11	-0.719989	-1.7343
	LOXL2	1.23469	0.939635	1.14197		PLP2	0.997796	0.896661	0.991673		S100A13	0.616694					ADORA3	0.782634						TMEM127	0.668091	0.909476						CDKN1C	-0.738917					LMOD1	0.602741						SDHB	-0.716575	-0.950509
	CCL18	1.23094	1.10612	1.2586		PPAP2C	0.994587	0.71731	0.954416		HIST2H2AA3	0.616166					MAST2	0.781155						TSR3	0.666601	0.721996						SDC1	-0.745577					DRP2	0.602575						MRPS31	-0.712953	-1.22456
	PRELP	1.23061	0.94376	1.02459		KDELR3	0.991841	0.831513	0.878084		CHRDL1	0.614036					AGPAT1	0.776529						KLC1	0.666133	-1.59924						CLDN22	-0.755423					DES	0.602398						KIAA1033	-0.711725	-1.71506
	BGN	1.22085	0.965894	1.57918		GALNT3	0.985757	0.82162	0.874832		AVEN	0.613789					CD1C	0.774764						NPY5R	0.662645	0.659033						KBTBD11	-0.758091					DCT	0.601581						HADHA	-0.710194	-1.36238
	CDKN2C	1.21936	0.63559	1.13342		TPBG	0.985695	0.979589	0.941575		RASL12	0.613608					SIRT1	0.770417						HOXA11	0.662429	0.775819						RHOB	-0.759503					FABP4	0.601387						CYP11B2	-0.709088	-0.96928
	ENO2	1.21878	0.585948	0.904647		RUNX1	0.984303	0.920501	0.79621		PLCG1	0.61312					HDLBP	0.770021						SHMT2	0.660952	0.717447						HTRA1	-0.762173					IL12RB1	0.599388						RAB14	-0.708788	-1.12931
	KRT23	1.21863	1.53486	1.21388		CD93	0.98322	1.06543	1.08086		INPP5F	0.613043					TAF5	0.769163						YARS	0.660553	0.644018						C8orf44-SGK3	-0.764021					TRIO	0.59919						MT1G	-0.707752	-0.605276
	AOC3	1.21789	1.03335	1.35072		TM4SF1	0.981005	1.00657	0.76492		ANGPT2	0.612548					CANT1	0.768588						EFNA5	0.659153	0.998278						PCK1	-0.764329					SLC45A2	0.599123						CCNB1IP1	-0.70336	-0.67758
	IGKC	1.21373	1.22834	1.17659		GLIPR1	0.978925	0.928766	0.713064		LXN	0.610688					PAX8	0.767691						RASAL1	0.658718	0.930272						PPARGC1A	-0.766194					TREM2	0.59843						CD164	-0.702831	-0.963121
	CTSS	1.21097	1.15202	0.9705		RGS5	0.976974	1.02032	0.712653		RSU1	0.610523					MS4A1	0.764521						CTIF	0.658466	0.868289						PTGDS	-0.767185					ZNF93	0.598253						RAPGEF2	-0.701805	-0.687717
	SPARCL1	1.19986	1.3717	1.23629		KRT7	0.976845	0.876035	0.798956		PSTPIP2	0.610205					NOV	0.762696						PAX2	0.655172	1.00589						SLCO4A1	-0.767191					PTPN18	0.598134						HMGB1	-0.701243	-1.20446
	SFRP4	1.19855	1.11287	1.1248		CLDN4	0.975239	0.913753	0.726759		SLC27A3	0.608757					COX5B	0.761347						STX6	0.650477	0.618838						EXPH5	-0.775744					PMFBP1	0.596582						KLHL20	-0.700976	-0.86196
	ISLR	1.1983	1.09776	1.34626		MRC1	0.974999	1.35443	1.03048		ASAH1	0.608673					RNF187	0.760386						LPXN	0.650053	0.85515						CYP2C8	-0.781983					ZBTB44	0.596466						TUBB2A	-0.699493	-0.676562
	TLR1	1.196	0.981394	0.705548		RCN1	0.974287	1.02285	0.77352		SDF2L1	0.608639					KCNA5	0.758802						RASIP1	0.649317	0.882484						APOD	-0.783642					GABBR2	0.596416						SNX4	-0.698321	-1.23419
	CD300A	1.19543	0.935615	0.952379		EMP3	0.968564	0.9352	0.857613		PROS1	0.607289					TFEB	0.756411						TAF1C	0.647727	0.942275						NEBL	-0.786376					LECT2	0.595497						UFL1	-0.698308	-1.31175
	ACKR1	1.19013	1.11165	1.31204		NPY1R	0.967287	1.00745	0.66148		MFAP2	0.60693					PVRIG	0.756237						PSME4	0.645878	0.593374						TCEAL2	-0.796073					IL15RA	0.595178						BNIP3L	-0.697485	-0.635771
	GLRB	1.18825	1.25725	0.868041		HLA-DMA	0.967115	0.842568	0.611553		MYBPH	0.606039					CHERP	0.756098						TM4SF4	0.640981	0.735743						TACC1	-0.802332					TP53BP1	0.594788						RAD21	-0.696436	-1.44424
	NEFM	1.18558	1.12025	0.979062		TNFAIP2	0.965292	0.73389	0.864697		LYL1	0.60538					HIC2	0.754952						RAB38	0.639654	0.872642						STAP1	-0.817358					EPS8L1	0.594475						KIF5B	-0.695044	-1.33662
	CCL5	1.17751	0.88446	1.02952		CD2	0.952815	0.869853	0.824475		TACC3	0.603727					PLLP	0.754384						CTSZ	0.639628	1.61364						LOX	-0.819095					NCAM1	0.594014						PNPLA4	-0.69473	-0.913445
	TNFAIP8	1.17412	0.771309	1.02906		ITGB3	0.952117	0.882555	0.836448		MAPK11	0.602173					CHI3L2	0.754138						IFFO1	0.6387	1.09611						CEL	-0.827999					CACNB3	0.593695						HMGCS2	-0.694601	-0.668826
	FOLR2	1.16962	1.02889	1.2745		TES	0.949979	1.02728	0.807481		UBFD1	0.601871					FGFR3	0.753355						PDIA4	0.636534	0.673997						ZNF331	-0.836045					CPA2	0.593583						DNAJB9	-0.694392	-0.774339
	LPAR1	1.1694	1.05978	0.998803		CFD	0.949115	1.01078	0.703707		PTPN6	0.600677					NOSIP	0.75311						PML	0.635382	0.776044						MT1E	-0.837314					STX6	0.59312						MT1HL1	-0.693325	-0.592102
	ADAMTSL3	1.16787	1.3081	1.14638		CPE	0.946673	0.713968	0.698399		STIL	0.60046					METTL2B	0.752381						PPM1F	0.634094	0.833278						F3	-0.841051					E2F4	0.592802						SGPP1	-0.692872	-0.665274
	ENTPD1	1.16076	0.975155	1.29603		EVI2B	0.946425	0.951802	0.642894		NANS	0.599807					ENTPD3	0.747467						TCF3	0.633706	0.673265						TNNT2	-0.849632					PRRG3	0.592686						BHLHE40	-0.690605	-0.614256
	MAL	1.15965	1.41302	1.70138		CD3D	0.943574	0.796793	0.892047		FAM57A	0.599258					RUSC1	0.743894						ATP2A3	0.633104	0.936483						P4HA1	-0.853879					PLAUR	0.592367						METTL1	-0.689291	-0.710125
	CAV1	1.15697	0.83543	1.16887		IGLJ3	0.941817	1.07197	0.877378		VWA5A	0.598138					PDE4A	0.743416						MCM5	0.632776	0.67612						FRY	-0.857961					IFFO1	0.591652						SET	-0.688093	-0.929374
	CD248	1.15688	0.735077	0.960369		CYBB	0.940983	0.978738	0.738294		EFNB3	0.597544					CBFB	0.742856						TNFRSF11B	0.630027	-0.963844						SPOCK1	-0.86161					SPINK2	0.591253						HNMT	-0.687399	-0.924649
	CCL8	1.15687	0.91263	0.817149		SELL	0.937015	0.764139	0.895765		TLE2	0.596823					CD84	0.741989						SFPQ	0.629761	0.972123						BAIAP2	-0.873306					GPR27	0.590729						ACADM	-0.685256	-0.87365
	FBLN1	1.15658	1.04294	1.23935		LCK	0.93432	0.630658	0.761387		INPP4B	0.596677					KLHDC4	0.741591						NID1	0.628662	0.830641						MTNR1A	-0.876958					SRCAP	0.590442						STAG2	-0.683125	-1.17378
	C7	1.15458	1.38396	1.65017		IGHD	0.933249	0.70252	0.796577		SETMAR	0.596641					MMP15	0.741209						DNM3	0.623828	0.962798						PQLC1	-0.882206					GPR35	0.590175						ZNF24	-0.682933	-1.32696
	COL8A2	1.14967	1.08639	0.956252		MARCKSL1	0.932897	0.662565	0.826479		NBEAL1	0.596518					WDR6	0.7412						OXTR	0.623577	0.607212						CYP2B6	-0.888386					TMEM246	0.590135						RTN4	-0.682611	-1.04853
	DCLK1	1.14388	0.941991	0.7774		ACSL4	0.930574	1.01302	0.946727		HK3	0.595861					MAP2K2	0.739781						SLC22A17	0.62317	0.619337						KCNK5	-0.893609					GGA1	0.589952						GNB5	-0.682061	-1.2326
	MLLT11	1.14363	1.05338	0.823197		NXN	0.930531	0.912186	1.01527		SIL1	0.59538					BHLHE40	0.739469						CDC42SE1	0.621804	0.854493						DIXDC1	-0.903659					EPHA1	0.589811						ST3GAL4	-0.681741	-0.849446
	MAN2B1	1.13564	1.02526	1.09749		CD1C	0.928057	0.60463	0.982264		FYB	0.595054					VPS9D1	0.739356						APRT	0.621624	0.679102						TSKU	-0.906715					E2F1	0.589601						DDX18	-0.680931	-1.30026
	CST6	1.12804	0.860982	0.87554		LOXL1	0.91843	0.890666	0.746338		S100A3	0.593849					CPA4	0.739321						SLC16A1	0.618936	1.27031						RGS7	-0.910003					CA1	0.589599						AGT	-0.68076	-0.690006
	SEMA4C	1.12477	0.785859	0.871367		KCNJ8	0.916601	0.626138	0.622819		KLRC4-KLRK1	0.593807					LSS	0.739059						CYP1B1	0.618566	-1.2074						NR4A1	-0.941005					GALR3	0.589408						PDE4DIP	-0.670379	-0.701318
	COL3A1	1.12076	0.997353	0.907838		GZMK	0.915092	0.751421	0.857364		ORC5	0.593768					ANXA11	0.737051						CD160	0.618383	0.684038						CISH	-0.952476					PCYOX1L	0.589295						SLC1A1	-0.667912	-0.927471
	GABRP	1.12041	1.1281	1.15893		ADAMTSL3	0.915012	0.679989	0.747481		MEIS2	0.593699					ATP9B	0.736898						XCL1	0.61546	0.747024						ELL2	-0.956983					COL18A1	0.589124						TM7SF3	-0.665951	-1.03397
	ITIH3	1.11888	0.885466	0.624002		IFITM2	0.913182	1.14318	0.629234		MN1	0.592833					RBM14	0.736236						CELSR2	0.613371	1.23932						TUBGCP3	-0.961716					BTG2	0.588883						SSTR2	-0.663382	-0.660359
	MNDA	1.11845	1.23003	1.40213		LYN	0.912242	0.682492	0.687079		ATP13A3	0.592448					CADPS2	0.735284						WIPF1	0.61131	0.85866						ATF3	-0.963304					IFT122	0.588301						MAPRE3	-0.661348	-0.896465
	DOK5	1.11782	0.787288	1.32455		TMPRSS4	0.911744	0.7438	0.843009		FHL5	0.591977					MAN2C1	0.733349						LRCH4	0.610302	0.813708						PPP2R1B	-0.989229					CD4	0.588268						ACOX1	-0.660975	-0.883987
	STK17A	1.11575	1.02871	0.73511		FCER1G	0.911626	0.807776	0.847175		ARAP3	0.591258					OPA1	0.733295						FAM69A	0.609707	0.788226						RGS3	-0.994324					DMXL2	0.587982						DECR2	-0.659967	-0.665705
	BLNK	1.11547	1.27908	1.57834		HCLS1	0.910569	1.1867	0.732692		CHMP4A	0.591127					AP1G1	0.73047						DOCK6	0.609397	0.645251						PFKFB2	-1.00101					SQLE	0.586447						ANKRD12	-0.659259	-1.39547
	GPR18	1.11542	0.858417	0.924349		FCGR3A	0.909835	0.591329	0.702406		AK1	0.589847					CD8A	0.729215						AGA	0.609277	-0.754291						ZFP36	-1.01099					EPHA2	0.586131						HMG20B	-0.658976	-0.925979
	IRF8	1.11465	1.18095	0.908549		PNMAL1	0.908898	0.86283	0.787787		FKBP1B	0.589309					FGFR4	0.7289						TNS1	0.609265	1.15197						APOC3	-1.01776					RPS10P2	0.58582						MTDH	-0.658849	-1.35379
	FAM129A	1.11461	0.977464	0.901279		CFH	0.891017	1.20904	0.845209		LMNB1	0.589268					BRD1	0.726649						EPHA3	0.608027	0.760095						DDIT4	-1.02299					CYP2A6	0.585595						GABRA2	-0.658405	-0.644363
	MICALL2	1.11371	0.796501	0.866409		DEFA1	0.887901	0.636094	0.954758		BCL11B	0.588759					HSD17B2	0.724639						RPL35	0.603881	0.956404						NEDD9	-1.06959					ZNF580	0.585546						EIF5B	-0.656479	-1.66336
	JUP	1.10985	0.940351	0.9574		DOK5	0.884846	0.632576	0.862016		MAN1B1	0.588604					LRRN2	0.723715						ZNF593	0.602563	0.779175						SLC19A2	-1.09339					LSR	0.585444						SOX15	-0.656407	-0.961582
	PAPPA2	1.10951	1.12071	1.04387		SELP	0.883452	0.648386	0.96012		P2RX5-TAX1BP3	0.58686					RAPGEF3	0.723672						NUBP2	0.602241	0.734212						TMEM100	-1.12341					MIIP	0.585082						MAPKAP1	-0.655709	-0.957283
	PLN	1.10376	1.24754	0.931979		A2M	0.883228	0.819744	0.689634		CAPZA1	0.586252					CCL11	0.723447						GREM1	0.59945	0.607329						FOSB	-1.14927					SUCLA2	-0.585418						PRKCI	-0.655606	-1.22334
	ADRB2	1.09887	0.739799	0.936727		CST6	0.880376	0.610589	0.84968		POPDC2	0.585962					COX11	0.723369						ITK	0.597917	0.642835						LEFTY1	-1.15614					ST13	-0.585438						MUC13	-0.655603	-0.736562
	SERPINF1	1.09871	1.09	0.877565		C1RL	0.874585	0.777881	0.623895		ZPR1	0.585948					CEBPB	0.722569						TPGS2	0.597515	-1.35252						RGS1	-1.17424					WWP1	-0.58558						MSMO1	-0.655002	-0.872612
	TNXA	1.09725	0.850524	0.952596		VOPP1	0.872297	0.934443	0.659716		PTPN13	-0.585695					MIR1244-3	0.722414						TOX	0.596812	0.585146						SGK1	-1.21351					PDGFC	-0.585726						PRPF4	-0.653482	-1.06512
	TMPRSS4	1.09601	1.03883	1.23901		HGF	0.871338	0.924856	0.823376		RABGAP1L	-0.59063					NOP14	0.720831						TNF	0.596365	0.603828						SPINK1	-1.25908					PPP1R7	-0.585843						GNB1	-0.652641	-1.28435
	PLEK	1.09413	0.693335	0.779406		TUBB6	0.870721	0.990128	0.923118		ST13	-0.591278					ATP2C1	0.7203						RHOF	0.595648	0.631576						NR4A2	-1.26687					MTO1	-0.585884						ACO2	-0.651452	-0.726737
	MALL	1.09319	0.767711	1.10022		NLGN4X	0.869634	0.699482	0.599904		PELI2	-0.592401					RIN2	0.71987						ITGB5	0.594868	0.847255						GADD45B	-1.30098					DYNLRB1	-0.586155						PPARA	-0.651302	-0.732833
	FMOD	1.09147	0.92345	1.0299		ITGAM	0.86481	0.712983	0.802779		APPBP2	-0.592458					FZR1	0.71968						USP48	0.594833	1.50757						ZFAND5	-1.34132					MBNL2	-0.586371						ABLIM1	-0.649431	-1.10413
	EDNRB	1.08641	1.3686	1.08854		POU2AF1	0.86369	0.750723	0.798171		F3	-0.593667					FZD1	0.719096						MRPS18A	0.594435	0.826614						FOS	-1.38785					BBOX1	-0.586397						TPCN1	-0.648249	-0.721984
	PLVAP	1.08592	0.941023	0.92986		ITPR3	0.86142	0.718463	0.997747		AKR7A3	-0.593912					SMG7	0.719019						GUCY1B3	0.593339	-0.624336						SIK1	-1.4483					FAM175B	-0.587063						AUH	-0.647093	-0.843482
	TACSTD2	1.08592	1.33698	1.64481		S100A13	0.859559	0.673225	0.707947		SALL1	-0.59489					PCNT	0.717616						RPP40	0.592767	0.607727						MAFF	-1.51833					DERL1	-0.588261						GULP1	-0.646492	-1.10124
	PMP22	1.08574	0.918412	0.631565		CP	0.858179	0.801318	0.794351		ARC	-0.60395					SFT2D2	0.717236						VAV3	0.592592	1.01122						TSC22D3	-1.6125					ARPP19	-0.588923						GOLGA2	-0.646466	-0.971327
	CXCL8	1.08549	1.16037	0.96052		FSTL1	0.85457	1.08273	0.588334		FZD7	-0.605905					TRIM29	0.716974						HTATIP2	0.592277	-0.895127						ZBTB16	-1.89416					EIF4G1	-0.588999						NPEPPS	-0.644152	-1.20275
	OLFML2B	1.08395	1.06514	1.08983		ABCC3	0.853867	0.608483	0.811363		CYP3A7-CYP3AP1	-0.610486					SMPD2	0.716062						NTAN1	0.589019	0.797638												C2CD5	-0.589153						DYNC1LI2	-0.644094	-1.50612
	OLFML3	1.08297	0.816357	1.44671		LST1	0.85275	0.879749	0.74317		GYG2	-0.612242					PFDN5	0.715794						SLC7A6	0.586621	0.652484												SLC17A3	-0.589549						DLAT	-0.639421	-0.684355
	LYVE1	1.08248	1.05662	1.18398		APOBEC3G	0.851841	0.717636	0.589254		SULT1C2	-0.612406					BCL11A	0.715375						WBP11	-0.584991	0.797956												PCDH9	-0.589579						EZR	-0.639257	-1.1359
	MID1	1.08244	0.913865	1.02779		CECR1	0.850769	0.97621	1.04117		GPD1L	-0.613857					MKL2	0.715257						BEX4	-0.58627	-0.983507												GATAD1	-0.589948						PTPRD	-0.638674	-0.899239
	ABCC3	1.0708	0.977598	1.10622		HRH1	0.850664	0.746163	0.758617		MTHFD2	-0.614382					TXNL4B	0.714701						EID1	-0.588202	-1.9484												TMEM70	-0.590346						TBL1X	-0.638317	-1.45877
	NID2	1.06883	0.757547	1.11402		RASSF2	0.841749	0.745032	0.673692		MTARC2	-0.615113					MAP3K11	0.71463						TAX1BP1	-0.588456	-1.43041												MRPS12	-0.591014						TACO1	-0.635929	-0.789319
	ADAM12	1.0651	0.657785	0.616944		FLI1	0.839187	0.69188	0.823711		HMCES	-0.616285					ST5	0.714396						DST	-0.593024	-1.40349												ARL1	-0.591051						SLC38A6	-0.634912	-0.808657
	TARP	1.06097	0.695183	1.1181		BASP1	0.838766	0.636977	0.673852		NOX4	-0.621711					MAN1C1	0.714118						ALDH7A1	-0.597395	-1.54703												TMEM230	-0.591254						MLX	-0.634027	-0.836121
	FILIP1L	1.05618	1.0724	0.874049		TGM2	0.830623	0.601107	0.666622		CYP39A1	-0.627489					KPNA1	0.712682						H3F3A	-0.597616	-0.942583												PNPLA2	-0.591398						SOBP	-0.633025	-0.753521
	MPZL2	1.05582	0.947308	0.95684		PHLDA2	0.829308	0.958887	0.729444		CR2	-0.629508					SH3GL3	0.712344						UQCRC2	-0.597812	-1.3977												TPMT	-0.591836						SAR1B	-0.632319	-0.818319
	EVI2B	1.05539	1.18393	0.898244		MUC1	0.828039	0.943529	0.844352		CRYAA	-0.640963					SMC1A	0.712321						RHOBTB3	-0.598333	-0.771055												APOL2	-0.591884						MTFR1	-0.631945	-0.869019
	TGFB2	1.05283	0.721079	0.733955		ICAM2	0.818041	0.792052	0.591932		TMEM38B	-0.642445					AIM1	0.711557						BCAR3	-0.59834	-0.646556												MED21	-0.592155						ISCA1	-0.62967	-0.986217
	TBC1D16	1.05205	0.781036	1.31387		RRAS	0.817121	0.745441	0.795236		HIPK3	-0.642956					GPNMB	0.711238						TMBIM6	-0.598562	-1.48547												CUX1	-0.592163						ANGPT1	-0.628153	-0.924697
	CP	1.04624	1.00701	1.03867		MYC	0.816562	1.33126	0.843472		CYP3A4	-0.643713					LUZP1	0.710761						IQGAP2	-0.59863	-0.908121												TMED5	-0.592263						AOX1	-0.62722	-1.00585
	WNT2B	1.04584	0.808423	1.00871		ISG20	0.815678	0.737086	0.716325		CRYM	-0.643716					TIAL1	0.709942						SCAMP1	-0.599417	-1.80209												SLC39A8	-0.592479						SLC16A4	-0.627016	-0.912425
	MICAL1	1.04477	0.875008	0.767206		CXCL8	0.813939	1.11591	0.817016		ACADM	-0.643886					DUSP22	0.709529						BNIP3L	-0.605411	-1.31072												SLC35A3	-0.592548						ECHDC1	-0.624762	-0.736237
	CD24	1.04032	1.35891	1.20118		GPR56	0.813452	0.640352	0.75587		GPX3	-0.644383					H2AFX	0.709172						LGALS8	-0.607786	-0.956491												UHRF1BP1L	-0.592764						IDH3A	-0.623747	-0.593037
	CELF2	1.03501	0.833635	0.916287		CCDC109B	0.81296	0.754402	0.653208		EHHADH	-0.647					FARSA	0.708845						DAZAP2	-0.608148	-1.44844												PIN4	-0.59334						DPP8	-0.623094	-1.19017
	ADA	1.03437	0.739242	0.946621		NPDC1	0.808129	0.682499	0.855666		NOTCH2	-0.647968					ZER1	0.708707						ARF6	-0.609653	-1.17855												NBN	-0.593578						IDH3B	-0.62144	-0.763638
	RAP1GAP2	1.0334	0.920965	1.07066		MICAL2	0.795376	0.739514	0.67619		FZD5	-0.64947					COBLL1	0.708615						UBA1	-0.612345	-0.621989												GLB1L	-0.59398						RABGGTB	-0.619557	-0.933468
	C4A	1.03229	1.06946	1.62751		PTGER1	0.795232	0.613686	0.927602		MT1X	-0.658701					PLAGL2	0.708254						STAT1	-0.615733	-1.49884												CALR	-0.594433						ST3GAL1	-0.618954	-0.772009
	CYTH4	1.02627	0.757334	0.935886		CD86	0.795159	0.653387	0.784355		RHOBTB2	-0.665185					CRIPT	0.707964						RNF220	-0.616242	-0.75077												PMS2	-0.595222						ITGA6	-0.618771	-0.979501
	SOX4	1.02511	0.823943	0.612564		TBC1D16	0.780059	0.683933	0.736857		SLC17A5	-0.668404					VAT1	0.707473						KLF7	-0.618625	-1.38249												FBXO3	-0.595587						IVD	-0.617892	-0.783903
	TPD52L1	1.02408	1.23633	1.22237		VSIG4	0.77979	1.13167	0.639157		SEMA3C	-0.668625					IRF2	0.707305						POLA2	-0.621227	-0.591741												CTAGE4	-0.595678						WAC	-0.615848	-1.37887
	EMP1	1.01628	1.08868	0.803742		ST6GAL1	0.776574	0.781359	0.788626		HPN	-0.670583					KIF2C	0.704103						SNX2	-0.623067	-1.70049												HNF4G	-0.596159						MOCS2	-0.6143	-0.82773
	FBN2	1.01308	0.76812	1.03875		TACSTD2	0.76739	1.10626	0.897223		TENC1	-0.670846					UQCRB	0.703952						SLBP	-0.628821	-0.968874												PDP1	-0.598474						SFTPC	-0.614148	-0.982835
	STAB1	1.01294	0.715159	1.21901		LY86	0.766021	0.668131	0.757656		PEPD	-0.673973					ALG13	0.703951						SLC31A2	-0.630896	-0.820085												TMEM260	-0.598544						UBE2G2	-0.613074	-0.874471
	HLA-DQB1	1.01222	0.967374	-1.00396		PMP22	0.758079	0.890984	0.787044		OLAH	-0.675332					CD33	0.702672						MBTPS1	-0.631148	-1.70582												ELAVL1	-0.599017						UQCRC1	-0.61256	-0.653493
	COL13A1	1.01124	0.668854	0.734619		PRKCH	0.75015	0.767253	0.634339		SLC12A6	-0.680765					PCGF2	0.70242						GJA1	-0.631392	-0.705531												GRINA	-0.599027						PAQR5	-0.612404	-0.990571
	DOCK2	1.00983	1.06145	0.735746		SLCO2A1	0.74843	0.843075	0.943688		BTG2	-0.685841					ZNF467	0.698739						SOBP	-0.632691	-1.17135												CARD10	-0.599208						MRPS18B	-0.612025	-0.991718
	S100A2	1.00891	1.55866	1.69865		ELF3	0.747916	0.83035	0.626416		SGPP1	-0.686124					DVL2	0.69645						F2R	-0.635961	-0.651223												RNF19A	-0.600495						DUSP3	-0.61002	-0.865704
	DYRK2	1.00697	0.830066	0.64642		FCN1	0.742481	0.676193	0.678183		PDZK1IP1	-0.686449					CLCNKA	0.694817						CLIP1	-0.636031	-0.751894												TRADD	-0.600606						RNF5	-0.607547	-0.825112
	GPR56	1.00665	0.977293	1.20227		ABCC1	0.74237	0.625376	0.676611		SLC1A1	-0.687538					GALNS	0.694446						UBE2G2	-0.639248	-1.02803												PGRMC2	-0.600656						UQCRC2	-0.607509	-0.875775
	PCOLCE	1.00661	0.919895	0.989976		STAB1	0.738056	0.660086	1.04863		CALML3	-0.687782					TRRAP	0.694121						GK3P	-0.639577	-0.598653												PPP2R5C	-0.601181						FOXO3	-0.60747	-0.796536
	DZIP1	1.00619	1.1445	0.924935		IFITM3	0.733707	0.900217	0.60566		A1CF	-0.690933					TPST2	0.693857						CDC14A	-0.640163	-0.682581												ABCA1	-0.601431						DCAF7	-0.606998	-1.0859
	PDLIM4	1.00357	0.990303	1.06551		EMP1	0.732822	1.20157	0.732417		IRAK3	-0.692063					SUSD4	0.693474						ZFYVE21	-0.643006	-1.77322												USP10	-0.602376						EHBP1	-0.606778	-0.977704
	FAM49A	1.00294	0.7814	0.745536		PIGR	0.729627	0.738071	0.846387		MMP28	-0.692646					PRKCQ	0.6908						KANK1	-0.645039	-0.625837												EIF3A	-0.603073						RDX	-0.606699	-1.09088
	PTGS2	1.00287	1.19931	0.979009		PLEK	0.728402	0.63503	0.724661		JUNB	-0.693805					LTB4R	0.690252						TEAD1	-0.652265	-1.13664												ELF1	-0.603196						SUZ12	-0.606293	-1.01105
	MYO1F	1.00229	0.918288	1.04598		ICAM1	0.728007	0.696976	0.896706		ETNPPL	-0.697952					KCTD14	0.690177						RFC1	-0.65467	-0.996657												NDUFAF1	-0.603556						SRSF5	-0.604556	-0.624701
	ABCA8	1.00206	1.33138	1.27181		SLC16A5	0.724245	0.989409	0.741561		CYP2B6	-0.698089					SATB2	0.690133						SOCS2	-0.654751	-1.02764												SDHD	-0.604249						PEX7	-0.603423	-0.668123
	TRIL	1.0001	0.685909	1.10541		TLE1	0.721645	0.953913	0.636128		PNMA2	-0.698497					FYCO1	0.688932						SLC25A36	-0.655685	-2.06363												SUCLG2	-0.604266						HSPD1	-0.603293	-0.887609
	PPL	0.998992	0.894437	1.48384		CLEC7A	0.720317	0.764262	0.647614		SLCO4C1	-0.698895					RBM15	0.688435						HSPA1A	-0.655939	-0.928737												SRSF10	-0.604485						KPNB1	-0.603024	-1.39804
	TPSB2	0.998254	0.794095	0.714269		FKBP11	0.717363	0.692268	0.737956		RYR3	-0.700276					RGS12	0.687638						OSBPL1A	-0.656293	-1.479												HBP1	-0.60463						LIMS1	-0.602365	-0.921422
	RASGRP1	0.996138	0.873006	1.00442		NCF2	0.714577	0.767156	0.589933		USP11	-0.704822					TMEM8B	0.68732						SLC16A10	-0.658832	-1.01298												AGA	-0.604661						TGOLN2	-0.600202	-0.87943
	IFI16	0.993213	0.705132	0.839898		TNFRSF17	0.712736	0.586328	0.59315		SLC12A3	-0.707385					WDR43	0.687092						AASS	-0.663265	-0.885921												MRPS35	-0.60553						SLC25A20	-0.599896	-0.696386
	EEF1D	0.993045	0.937429	1.33598		CD302	0.706083	0.850728	0.70709		H2AFJ	-0.716716					GTPBP2	0.685885						GABARAPL1	-0.663327	-1.6346												MED6	-0.605747						GPR144	-0.598248	-0.905473
	FOXE1	0.990232	0.833156	0.85154		CD163	0.705543	1.23163	0.790938		GLDC	-0.720033					KIAA0930	0.685804						EPHX2	-0.665649	-0.618585												ECI1	-0.605852						PGRMC1	-0.597803	-0.872716
	CDH3	0.989872	0.845199	1.04356		TIAM1	0.701065	0.654503	0.736372		ZFP36	-0.722799					RAB36	0.684763						CDC42EP3	-0.665752	-1.42702												API5	-0.605888						AQP1	-0.597155	-0.829803
	CD209	0.989837	0.977249	1.08195		SFRP1	0.697391	1.0056	-1.04547		ID4	-0.724474					NACC2	0.68453						RAB1A	-0.66613	-2.05444												TSFM	-0.60616						BCCIP	-0.596669	-0.727255
	SOX9	0.98874	1.15113	1.85453		ENG	0.689677	0.7483	0.834649		IL6R	-0.725632					SUPT3H	0.6844						MFSD6	-0.669725	-1.26667												PTGER4	-0.606683						FBXO9	-0.595877	-0.74851
	PPIC	0.987149	0.842635	-0.637304		THBD	0.689293	0.782481	0.618194		EPHX1	-0.729736					ZNF35	0.684375						NFKBIA	-0.676159	-0.857659												DKFZP586I1420	-0.607376						FYN	-0.595385	-0.950715
	LDLRAD4	0.986897	0.900174	1.12714		CD247	0.687171	0.600366	0.708746		PDZK1	-0.730023					KCNMA1	0.684035						RORA	-0.677271	-1.17494												NDUFB1	-0.607647						UBE3A	-0.594581	-1.06758
	TBC1D4	0.986478	0.873416	1.01924		CD69	0.683712	0.653074	0.626716		SPTB	-0.736499					IGLL5	0.683134						WWTR1	-0.67849	-1.15149												RAB11FIP2	-0.607714						EPM2AIP1	-0.594517	-1.01429
	PLA2G7	0.98602	0.854626	0.729525		FCGR2B	0.68336	0.623346	0.640417		MYRIP	-0.738621					CTSD	0.682522						FAM115A	-0.680928	-1.39395												LAMTOR3	-0.608024						ETFDH	-0.593216	-0.951526
	BZW2	0.983589	0.823329	1.04327		YME1L1	0.680138	0.665251	-0.839331		SRGAP2	-0.743273					NACA	0.682162						CAMK2G	-0.683055	-0.775841												TM7SF2	-0.608071						RNF14	-0.593152	-0.931789
	MAP4K4	0.983062	0.598658	0.654183		PLCB4	0.675697	0.683749	0.664238		CYP4F2	-0.746781					ZNF692	0.68025						TMEM47	-0.683485	-1.7045												ADARB1	-0.608072						SEC63	-0.592691	-1.29933
	PRR5L	0.982285	0.816866	0.823419		PRKX	0.657758	0.667214	0.714845		PDK2	-0.753585					MAP3K9	0.679798						PSAP	-0.687095	-1.0945												L2HGDH	-0.608292						MCCC2	-0.592273	-0.644722
	IGLL3P	0.975577	0.887065	0.884384		LAPTM4B	0.648949	0.61036	0.595901		RAB11FIP3	-0.754333					TNIP1	0.679576						PTGER4	-0.692932	-1.26033												SLC25A4	-0.608779						LRPPRC	-0.589768	-0.9077
	EDNRA	0.975575	1.03283	1.37107		CYP1B1	0.648558	1.16184	0.899069		KL	-0.754359					TRIM37	0.678322						NFATC3	-0.694598	-1.35567												IFIT1	-0.609175						RYBP	-0.589527	-1.10916
	SEL1L3	0.97479	0.864635	1.04012		S100A9	0.647944	0.664315	0.685073		PTGDS	-0.765262					OR7E12P	0.677744						PAPSS1	-0.696253	-0.856553												ACTR2	-0.609341						MYL10	-0.589442	-0.939305
	ADAP2	0.971914	0.753548	0.73193		IL4R	0.646113	0.836034	0.807072		CTH	-0.771623					TGFA	0.677091						CALM1	-0.698475	-1.57228												NUDT4	-0.610736						SPAG9	-0.588775	-1.1586
	TGM2	0.968853	0.641243	1.05862		FOLR2	0.636723	0.644808	0.66074		DAO	-0.776792					JUN	0.676249						RGS10	-0.699562	-0.860344												DDHD2	-0.610883						UBE2W	-0.58808	-1.01671
	CD247	0.968062	0.604501	0.735266		ITM2A	0.633534	0.94858	0.593458		KCNK5	-0.777862					NRF1	0.675172						HSPA12A	-0.703894	-0.668569												PUS3	-0.61263						HMOX2	-0.586972	-0.653987
	HPGDS	0.96571	1.04805	1.19338		IGFBP6	0.625242	1.09884	0.624883		SLC19A2	-0.780321					RPL14	0.67437						NQO1	-0.707507	-0.9575												MRPL34	-0.612868						VDAC1	-0.585423	-0.876242
	SOD2	0.963606	0.804891	0.730093		SRPX	0.622491	0.674294	0.708118		SLC6A13	-0.781074					RAI2	0.674098						KIRREL	-0.71824	-1.34047												ALG13	-0.613128						RASAL1	0.585503	0.685988
	ARHGAP6	0.961095	0.984309	1.281		MMD	0.618013	0.846045	0.616016		SLC7A7	-0.781299					KIF5C	0.672468						CSPP1	-0.723045	-1.23501												RFK	-0.614562						RNF24	0.585854	0.710485
	PTGER2	0.960071	0.674043	0.634014		NQO1	0.613673	0.727499	0.977972		ESRRG	-0.787238					MIIP	0.672447						PALLD	-0.725945	-2.14975												CCBL2	-0.614958						CD300A	0.587402	0.730076
	KCNJ8	0.957628	1.00327	1.12556		UPP1	0.599004	0.618947	0.663915		CYP17A1	-0.787763					FAM86A	0.672211						CLDND1	-0.72705	-1.88106												CDKL1	-0.615944						ST5	0.588437	0.655995
	BEAN1	0.952622	0.823497	0.675203		AHNAK	0.590612	0.813191	0.705028		GPRC5A	-0.797047					ATP6V0E2	0.671449						ZFAND5	-0.727089	-0.951852												SRSF3	-0.616933						HK1	0.589781	0.658775
	STS	0.946768	0.771949	0.778665		EFEMP1	0.58511	0.875162	0.617456		PIPOX	-0.802628					DVL1	0.670912						CDKN1C	-0.727606	-1.22966												RSL1D1	-0.617219						SVEP1	0.591307	0.788687
	HIST1H4J	0.945854	0.641233	0.770481		ADH5	-0.586017	-0.605411	-0.947933		PON1	-0.813271					CTDNEP1	0.670828						SLC38A2	-0.729373	-0.858243												SRSF7	-0.617257						NEK11	0.592793	0.648631
	DHCR24	0.943945	0.758834	0.935421		PCBD1	-0.587608	-0.608543	-0.821411		MT1G	-0.815306					MLF1	0.670357						PTPRD	-0.730984	-1.15392												MRS2	-0.618334						ATHL1	0.593027	0.726617
	RASSF2	0.942572	0.858411	0.684856		PC	-0.59561	-0.798055	-0.619688		SLC2A2	-0.817712					OR7E14P	0.670266						PGK1	-0.734323	-2.12688												LGR4	-0.618446						MPZL1	0.594135	0.753988
	SV2B	0.940912	0.761619	0.893208		FMO1	-0.597671	-0.950708	-0.962798		KAT7	-0.818283					GPRC5C	0.669127						CXADR	-0.735705	-1.93261												NBR1	-0.618685						PLXNA1	0.596437	0.663482
	TUBA4A	0.93942	0.944806	0.811866		ACAD8	-0.59868	-0.622137	-0.628269		CDHR5	-0.820039					SLC19A1	0.669087						SLC39A6	-0.73685	-1.81453												CMAS	-0.619133						IDO1	0.599013	0.909802
	HEPH	0.932243	0.761333	0.746865		GIPC2	-0.600651	-0.606853	-0.603385		ETNK2	-0.82325					APAF1	0.668927						ACSF2	-0.746329	-0.685333												GRSF1	-0.619204						HABP2	0.599663	0.847873
	NTRK3	0.931593	0.963694	1.28813		GDPD3	-0.610513	-0.685964	-0.679854		TIPARP	-0.82444					TESK2	0.668655						PEBP1	-0.747518	-1.2745												HSPA1A	-0.619867						PRF1	0.602811	0.596675
	ADRA2A	0.930468	0.939567	1.17898		ALDH8A1	-0.61173	-0.721451	-0.907138		SERPINA6	-0.852994					SMAD3	0.668151						KTN1	-0.748054	-1.80034												ABI1	-0.620127						PTTG1	0.60321	0.712355
	CAV2	0.928774	0.740126	0.754087		PGPEP1	-0.611976	-0.8658	-0.717899		ZNF189	-0.865774					IDS	0.668076						PICALM	-0.754432	-2.11604												GGCT	-0.620437						COL5A1	0.604134	0.597071
	TPSAB1	0.928702	0.725905	0.785107		DDX10	-0.612729	-0.868125	-0.801286		GSTA3	-0.873048					GRSF1	0.667522						PDE4B	-0.754526	-0.95073												PHACTR2	-0.620901						CHI3L2	0.60476	0.648165
	CH25H	0.926325	0.855974	0.897792		FUT6	-0.613329	-0.757623	-1.15854		RASL11B	-0.875599					WASF1	0.667428						YWHAZ	-0.760955	-1.20004												NDUFA8	-0.622237						SDC3	0.604832	0.675273
	JAG1	0.925772	0.950111	1.4016		SLC22A11	-0.61343	-0.741424	-0.623353		AGMAT	-0.876584					TTC9	0.667103						HSPD1	-0.764387	-1.46323												LSM14A	-0.622676						HBD	0.60626	0.665721
	L1CAM	0.925506	0.994379	0.984968		GAS2	-0.614794	-1.01761	-0.696489		TMEM2	-0.87671					NCK1	0.667002						SEPTIN11	-0.764552	-0.60203												MYLIP	-0.62307						TP53TG3	0.607861	0.770845
	ECT2	0.924101	0.793086	0.70643		AK2	-0.619938	-0.769955	-0.810867		AGXT	-0.879364					AKAP7	0.666876						EIF5	-0.769643	-1.94312												PEBP1	-0.623194						RBPMS	0.6091	0.668493
	PDGFRA	0.923728	0.802249	0.644681		ERBB3	-0.62026	-0.651204	-0.818703		APOH	-0.880261					ERV3-2	0.665797						RNASE4	-0.772969	-0.932587												RECQL	-0.623759						ZDHHC13	0.610266	0.684744
	CLEC4A	0.920211	0.873869	0.764433		MYCN	-0.621058	-0.702544	-0.935537		PC	-0.884716					KIAA0125	0.66533						MCL1	-0.775753	-0.614881												CLDN6	-0.623786						PLEKHO2	0.613136	0.688264
	CLEC5A	0.917967	1.0187	1.00773		TDP2	-0.62277	-0.610955	-0.997943		UGT2B28	-0.886862					UBE2C	0.664365						MAGI2	-0.777162	-0.98203												SIKE1	-0.624909						SYNE2	0.613409	0.81839
	FAM110B	0.916638	0.850783	0.876772		IDH1	-0.624843	-0.826506	-0.855151		SLC17A1	-0.886874					IL1B	0.664325						LPIN1	-0.784416	-0.940835												FECH	-0.625049						CD209	0.614643	0.766258
	GAS7	0.915852	0.723855	0.896811		GALK1	-0.629933	-0.645216	-0.646504		FTCD	-0.887519					COX6A2	0.663685						DHRS3	-0.786739	-0.776846												SLC6A2	-0.625361						LCP1	0.620255	0.738361
	SVEP1	0.914372	0.943014	1.17438		FUZ	-0.631336	-0.626261	-0.740869		PBLD	-0.891762					RPS27	0.663532						NQO2	-0.786975	-0.955362												CIAO1	-0.625499						RPS11	0.621963	0.816469
	VASH1	0.913523	0.704107	0.648979		FMO5	-0.631611	-0.737359	-0.902909		ATF3	-0.896113					LAMP3	0.663316						HGD	-0.791727	-0.765018												HEXIM1	-0.625526						ZCCHC24	0.624621	0.599588
	SACS	0.912368	0.760908	0.845608		EHHADH	-0.634697	-0.638281	-0.852825		DAB2	-0.896201					SPAST	0.66319						HSPA9	-0.796091	-1.43207												MIEF1	-0.625819						NCKAP1L	0.626693	0.733902
	LAIR1	0.911365	0.771623	1.13654		BST1	-0.642234	-0.643742	-0.73676		RHCG	-0.901136					CD3E	0.662829						GLUL	-0.808181	-1.29994												KAZN	-0.626267						MMP2	0.627338	0.659507
	CKLF	0.90987	0.692405	0.653807		CYB5A	-0.644283	-0.657558	-0.679082		PCK2	-0.902117					CPS1	0.662378						TJP1	-0.820655	-1.17094												GALT	-0.627166						KCNS3	0.628185	0.612237
	EPS8	0.907155	1.03532	1.32558		MSH3	-0.64492	-0.738344	-1.03527		MAOA	-0.904145					TFAP2C	0.662325						EXPH5	-0.824206	-0.78196												ASNSD1	-0.627347						CH25H	0.63083	0.663478
	INPP5D	0.902841	0.652834	1.06003		BCKDHB	-0.647444	-0.825136	-0.90844		HMGCS2	-0.905213					IL2RG	0.661996						PDLIM5	-0.828961	-1.41127												SAT1	-0.627463						XCL1	0.632508	0.796995
	COL21A1	0.902812	0.609705	0.592164		BNIP3	-0.648658	-0.632692	-0.780614		SLC22A11	-0.909354					MSANTD2	0.661958						HSDL2	-0.832953	-1.22926												EGOT	-0.627686						QSOX1	0.636882	1.05501
	LMOD1	0.901432	0.772373	0.889915		TTC38	-0.650753	-0.684837	-0.736302		NR4A1	-0.910261					DEPTOR	0.661891						CDS1	-0.838595	-0.825826												MRPL35	-0.628682						IL16	0.642027	0.846923
	TTC39A	0.900687	0.928277	0.640629		PDZK1IP1	-0.651051	-0.625671	-0.701831		ALDH8A1	-0.925305					ABL1	0.661682						NUPR1	-0.846806	-0.869359												VGLL4	-0.6297						TMEM158	0.644207	0.758238
	CD86	0.896777	0.856445	0.931269		MAOB	-0.654694	-0.670916	-0.708961		CEBPD	-0.927741					XPOT	0.661667						DUSP1	-0.859787	-0.779386												MAP3K2	-0.631951						IL2RG	0.645525	0.657187
	WWC1	0.896757	0.748277	1.4393		GBA3	-0.656177	-0.689907	-1.11719		RNF186	-0.941713					POGZ	0.660816						TPD52	-0.859793	-1.2238												IFT46	-0.632189						PLCB1	0.645548	0.605811
	GALNT3	0.894253	1.04828	1.02227		TST	-0.659121	-0.670005	-0.81947		GBA3	-0.954941					LDLRAP1	0.660795						SDPR	-0.862152	-1.36332												CMC2	-0.633161						SH2B3	0.651135	0.659126
	PLEKHO2	0.893692	0.604801	0.985518		ACSL1	-0.659405	-0.611423	-0.824996		BHMT	-0.958722					COL4A6	0.660756						CAPN3	-0.863238	-0.819829												PMS2P1	-0.633267						TRAF3	0.655491	0.656059
	CSPG4	0.892893	0.779906	1.06609		PDZK1	-0.660536	-0.594692	-0.76015		XYLT1	-0.963425					G3BP1	0.659444						RCAN1	-0.86593	-1.4094												NECAB2	-0.633422						SAA1	0.656388	0.788743
	PPAP2C	0.892362	0.73955	0.603854		HDHD3	-0.664307	-0.832962	-0.9255		KHK	-0.974384					IL2RA	0.659143						G0S2	-0.86807	-0.666439												USP47	-0.63347						BCL11A	0.656762	0.634107
	CRTAC1	0.892298	0.689841	0.59854		PBLD	-0.669028	-0.699541	-0.681548		ABCC6	-0.978855					MAT1A	0.658428						ALDH2	-0.869278	-0.830961												RRAGC	-0.63462						ENTPD1	0.66153	0.745522
	IGSF6	0.89219	0.800424	0.60919		ACE2	-0.671365	-0.708138	-1.03673		CDH10	-0.991214					NUP214	0.657743						NDRG2	-0.871247	-1.36308												GLYR1	-0.635334						TYMP	0.661569	0.752577
	ELOVL6	0.890547	0.661875	1.02789		LANCL2	-0.672806	-0.637554	-0.770877		ALDH4A1	-1.0003					WNT6	0.657572						CMAHP	-0.884476	-0.89038												TMEM135	-0.63598						LYPD1	0.66604	0.609175
	PRF1	0.884168	0.700198	0.983763		OGG1	-0.675336	-0.757706	-0.804317		SLC7A9	-1.00126					PTRF	0.656572						SLC37A4	-0.899174	-0.802978												CYB5B	-0.636241						MAN2B1	0.666269	0.726615
	LINC01140	0.882532	0.737337	0.792116		PLIN2	-0.675933	-0.726237	-1.12703		ALDH1L1	-1.00374					TFF3	0.656437						WASL	-0.907964	-1.76117												TRIP4	-0.636307						MYRF	0.66834	0.769772
	TMEM158	0.881598	1.0167	1.17894		DHRS4	-0.678444	-0.590601	-0.798852		DPEP1	-1.00887					KLF12	0.656154						PLTP	-0.912702	-1.00843												RC3H2	-0.636875						CACNA2D3	0.670467	0.673707
	VAV1	0.879503	0.670307	0.656242		CRYAA	-0.682806	-0.891896	-0.706494		ARG2	-1.03076					NRGN	0.656125						FGF1	-0.919895	-1.47294												CXCL14	-0.637046						IFNAR2	0.672777	0.604842
	TLE3	0.875474	0.615604	0.983188		LIME1	-0.684601	-0.723266	-0.970385		CYP4F3	-1.03813					GAS6	0.654607						GPHN	-0.924833	-1.65376												DNM1L	-0.637078						CRLF3	0.674423	0.625522
	TES	0.874504	0.88881	0.862086		ISOC2	-0.685823	-0.59062	-0.624838		PRKAR2B	-1.05045					WFS1	0.652145						FAM20B	-0.933403	-1.47454												ARIH2	-0.637544						CALHM2	0.67743	0.775151
	ATP6V0E1	0.871143	0.950797	1.24425		TM4SF5	-0.69094	-0.686029	-0.809685		CYP3A7	-1.07331					ATP6V0A1	0.65197						SS18	-0.934497	-1.72114												FAM20B	-0.63847						KIAA0226L	0.678708	0.668535
	LTBP2	0.865012	0.932734	1.64626		DNPH1	-0.697969	-0.674426	-0.823318		SORD	-1.07757					HIP1R	0.651661						TYRO3	-0.937806	-1.72174												STIP1	-0.63865						SH3GL3	0.680745	0.917433
	SSUH2	0.862192	0.708306	0.816611		PRNP	-0.698067	-0.585754	-1.0705		PRODH2	-1.09277					SELP	0.650121						SASH1	-0.947175	-1.40917												ATP1B1	-0.638826						CEMIP	0.68225	0.62918
	FCGR1A	0.86095	0.765089	0.682041		ACADL	-0.701057	-0.800052	-0.998131		SLC34A1	-1.09812					NDUFS7	0.650072						HSP90B1	-0.951068	-1.85027												CREB1	-0.63911						WWC1	0.683623	0.679871
	ITPR3	0.860302	0.617656	0.990665		SLC47A1	-0.703618	-0.785235	-1.14445		ACE2	-1.11142					ATHL1	0.649775						SIK3	-0.952474	-0.750789												PDAP1	-0.639281						ADRA2A	0.685051	0.625454
	MYH11	0.860202	0.834543	1.00455		GCHFR	-0.705195	-0.603639	-0.818258		GLYAT	-1.11436					EPS8L1	0.649564						SLC13A1	-0.967621	-0.842392												STOML2	-0.639483						COL4A6	0.686376	0.741397
	STAT4	0.860164	0.78846	1.06732		PTH1R	-0.70745	-0.80159	-0.626557		SLC13A3	-1.12704					ZEB2	0.64867						HSP90AA1	-0.980105	-2.60025												HNRNPC	-0.639906						ADH1C	0.691297	0.625888
	LIF	0.857393	0.631608	0.974418		SLC27A2	-0.709725	-0.720684	-0.609126		DIO1	-1.1463					CUEDC2	0.648662						ACTB	-0.997619	-2.46019												BDH2	-0.640011						BTN2A2	0.693406	0.613406
	EPHB2	0.854303	0.768169	0.828037		A1CF	-0.710177	-0.62865	-1.09855		AOC1	-1.16247					COX7A1	0.646862						LEPROT	-1.0122	-2.36103												TMEM63A	-0.640361						IL2RB	0.696624	0.738587
	FIGF	0.853724	0.744944	0.963721		PLD1	-0.711273	-0.739955	-1.08411		APOM	-1.16276					ASAP3	0.646765						GADD45B	-1.02156	-1.1475												AKIRIN1	-0.640465						ARHGAP25	0.697784	0.740126
	STK10	0.852233	0.605696	0.876924		MCCC1	-0.72125	-0.627819	-1.0087		FOS	-1.1641					OR7E37P	0.646255						ABHD14A-ACY1	-1.02985	-0.80797												SUOX	-0.640863						TDO2	0.698584	0.659099
	PTPRE	0.85144	0.665641	0.673037		SLC25A11	-0.723385	-0.679333	-0.785632		DPYS	-1.1744					PIGZ	0.64619						SPTAN1	-1.04354	-1.03025												PTK2	-0.641094						MINOS1-NBL1	0.700399	0.850355
	CD2	0.851264	0.706234	1.00055		HIBCH	-0.727661	-0.850444	-0.988046		UPB1	-1.18629					KCND1	0.64543						APOE	-1.06134	-1.17555												FBXW11	-0.641399						TNFAIP6	0.701106	0.607332
	TPM1	0.850717	0.738918	-1.42239		LGALS2	-0.731485	-0.829953	-1.06794		KLF9	-1.18913					CEP170B	0.644912						BHMT2	-1.08022	-0.78049												KIF3B	-0.64278						NKG7	0.708398	0.614037
	LILRB2	0.849848	0.739533	0.640605		GPR137B	-0.735358	-0.724053	-0.881184		PLCG2	-1.21753					DHRS9	0.643914						ACSM2A	-1.08303	-0.900261												RPS26P11	-0.643124						MYO1F	0.70927	0.63697
	RUNX3	0.848548	0.734463	0.861889		DNAJC16	-0.736363	-0.735363	-1.11609		SLC4A4	-1.22026					GALNT14	0.643799						CUBN	-1.09277	-1.08047												FMR1	-0.643155						HPGDS	0.711885	0.714772
	TMEM132A	0.848255	0.641426	0.640672		ACO1	-0.740138	-0.675147	-0.787436		FBP1	-1.22549					RRBP1	0.643492						AK4	-1.1049	-0.653155												SLC22A2	-0.643278						PTGES	0.712372	0.916396
	APOC1	0.845119	0.684752	0.672675		PECR	-0.742109	-0.708063	-0.742981		KLK1	-1.26228					SH3GL2	0.643142						FLRT3	-1.1271	-1.98267												CHD9	-0.644219						MFSD10	0.723186	0.763044
	KPNA2	0.838608	0.638114	-0.707855		GNA11	-0.743027	-0.607134	-0.735062		NR4A3	-1.27085					USF2	0.641023						DCXR	-1.12832	-1.07475												CTBS	-0.644297						HLA-DRB6	0.727825	0.814448
	DNM1	0.838563	0.667118	0.864558		GCLC	-0.748448	-0.748855	-0.650333		AFM	-1.2896					PRKRIR	0.641005						CYP4B1	-1.12883	-1.5322												SLC30A5	-0.644623						SEZ6L2	0.72959	0.844221
	COL8A1	0.83524	0.708467	0.66828		TREH	-0.74888	-0.902435	-0.610777		NR4A2	-1.32088					CD3EAP	0.640814						FERMT2	-1.15878	-2.48867												CDC27	-0.644656						PTGIS	0.732542	0.591469
	TNFSF10	0.833829	0.743535	0.672819		DNAJC12	-0.751857	-0.735011	-0.980056		SLC27A2	-1.34927					TBC1D22A	0.640627						AZGP1	-1.1776	-0.925885												KDM4B	-0.645774						SMAGP	0.735331	0.76254
	P2RX5	0.833758	0.809693	0.87792		TFEC	-0.752322	-0.764672	-1.30919		CXCL14	-1.36735					ATG14	0.640245						NEDD9	-1.18032	-1.08144												RCAN1	-0.645952						GPR18	0.735829	0.590861
	LAMC3	0.830701	0.821932	0.85301		ECI2	-0.760093	-0.774939	-0.899959		ESM1	-1.38251					ATP11A	0.640131						TNNC1	-1.22605	-1.54444												PSMA7	-0.646346						PVRIG	0.737431	0.903511
	GALNT1	0.830661	0.66281	0.92382		EBP	-0.760194	-0.685142	-0.896202		XPNPEP2	-1.44271					IDUA	0.640125						SOWAHC	-1.22823	-1.30565												EMC2	-0.648037						C2CD2	0.740507	0.68512
	NMU	0.829604	0.889202	0.856705		GATM	-0.764227	-0.749404	-0.666389		RBP4	-1.50221					SIN3B	0.639927						WT1	-1.24059	-1.87195												PDSS2	-0.649892						P2RY13	0.742402	0.654936
	KIAA0226L	0.829166	0.666515	0.899603		MGAM	-0.767903	-0.869583	-0.922816		SIK1	-1.51418					RNF24	0.639668						ALDH6A1	-1.30567	-0.957266												NDUFA10	-0.650303						INPP5D	0.742852	0.953739
	SH2D1A	0.828914	0.606149	0.669529		CLIC4	-0.76911	-0.825464	-1.2292		FABP1	-1.57055					SPEN	0.639029						SLC22A6	-1.33141	-1.01488												CCT2	-0.651752						HHEX	0.745048	0.611338
	PCSK5	0.827123	1.11038	-0.865206		NOX4	-0.773346	-0.794182	-0.976081		GSTA1	-1.65454					HCCS	0.638846						MGAM	-1.35807	-0.706174												TMBIM4	-0.651807						COMP	0.745609	0.747818
	CEMIP	0.826854	0.651634	0.984831		RMND1	-0.774419	-0.695043	-1.32535		SLC22A8	-1.68679					VPS33B	0.638839						EGF	-1.36848	-0.868858												TOMM40	-0.652118						IRF7	0.762885	0.598665
	LY86	0.825608	0.790673	0.763669		ADH6	-0.774657	-0.920839	-1.0034		CYP4A11	-1.72593					OBSL1	0.638184						PSPH	-1.37966	-1.05474												HSPA4L	-0.652911						LAIR1	0.763322	1.01301
	PIP5K1B	0.822014	0.633085	0.665396		GGH	-0.777422	-0.866066	-0.891752		CALB1	-1.88753					CPT2	0.637027						FKBP5	-1.4447	-1.61907												PPFIBP1	-0.653149						TLR5	0.772329	0.758088
	MAP3K7CL	0.818348	0.832056	0.818699		GPHN	-0.777481	-0.862805	-1.063		FOSB	-2.08536					RNPEPL1	0.635964						ZBTB16	-1.45851	-1.23932												MLXIPL	-0.653151						SH2D1A	0.776634	0.619187
	ITIH2	0.818221	0.871186	1.08019		ACADSB	-0.778246	-0.774986	-0.988185		G6PC	-2.15273					CDH1	0.635875						PLG	-1.50341	-1.23784												SLC11A2	-0.653655						JAM2	0.776742	0.879986
	CDCP1	0.815334	0.983641	1.06736		PYROXD1	-0.779617	-0.613602	-1.01601		CYP27B1	-2.31761					SP100	0.635492						PCK1	-1.56672	-0.829798												CTSA	-0.653715						LOXL2	0.787814	0.713467
	LAT2	0.813239	0.761664	0.703568		PNPLA3	-0.780076	-0.603161	-1.18224								GPR137	0.635491						LPA	-1.5786	-1.51489												AKAP1	-0.653969						PRKCQ	0.796097	0.827376
	DENND2D	0.812101	0.709276	0.970313		RGN	-0.781143	-0.861918	-0.874452								FST	0.635237						PDK4	-1.72993	-0.971179												PER2	-0.654521						PARP12	0.796171	0.586445
	RAB32	0.811816	0.620823	0.71255		ZGPAT	-0.785289	-1.06279	-0.942765								PGLYRP4	0.634875						HPD	-1.91232	-1.2373												GRAMD1C	-0.654542						LAMP3	0.797859	0.843159
	GGT5	0.811346	0.830277	0.805786		CRYM	-0.7854	-0.947956	-0.807115								TNIK	0.634178						IGF1	-2.08944	-1.65252												PTPLAD1	-0.655507						LGALS4	0.808979	0.968414
	ALDH1A3	0.810933	0.845823	0.928063		PEPD	-0.786329	-0.900027	-0.796948								SLC35D1	0.633975						ALB	-2.96614	-1.84831												PSMF1	-0.656351						HDAC9	0.813826	0.75291
	PRKCB	0.810446	0.653366	0.666262		GRPEL1	-0.787146	-0.699108	-0.897407								LPHN1	0.632998																				WIPI2	-0.656813						SPRY1	0.820863	0.724064
	COL6A1	0.810036	0.62264	0.940633		STAU1	-0.790553	-0.962003	-0.846105								UBE2D1	0.632569																				TBC1D15	-0.657254						PTPRE	0.823759	0.7244
	ABCA3	0.809619	0.62983	0.868345		PCBP2	-0.791147	-0.667116	-0.875691								MEPCE	0.631418																				FNDC3B	-0.657664						TLR7	0.828185	0.596958
	CD28	0.807621	0.727177	0.721958		PNP	-0.791278	-0.826553	-0.858961								BICD2	0.631114																				SETD1A	-0.658525						NFKBIE	0.834999	0.644926
	TAF1D	0.806895	0.613239	0.85625		P4HA2	-0.795057	-0.930401	-1.09544								GMIP	0.630784																				MPDU1	-0.658726						RGS4	0.849937	0.637053
	SSR4	0.80658	0.642134	1.06398		HSDL2	-0.795336	-0.595867	-0.918151								LY75	0.629846																				GAREM	-0.659511						MAGT1	0.857713	-1.10814
	P2RY14	0.804408	0.86922	0.769115		DAK	-0.796038	-0.694955	-0.603627								STARD5	0.629839																				HNRNPR	-0.659729						PTGS1	0.871957	0.809713
	RPL37A	0.800747	0.908368	0.649936		JUN	-0.79638	1.10855	0.676722								WIZ	0.629701																				DDX3X	-0.660255						MS4A1	0.89068	1.00377
	ADCY7	0.800612	0.779267	1.35714		ALDH4A1	-0.796449	-0.994523	-0.667682								FAM111A	0.629672																				AGPAT3	-0.660397						SLC6A20	0.990719	0.928216
	ITGA7	0.799978	0.595745	0.668872		APITD1	-0.79731	-0.605049	-0.939815								PAPSS2	0.62863																				TRIM44	-0.662139						HBA1	2.9434	1.20126
	SMARCD3	0.798201	0.812336	0.849534		MTTP	-0.800946	-1.02673	-0.985574								RBPMS	0.628204																				ABCG1	-0.662426
	TENM4	0.79697	0.624889	0.73107		SFXN1	-0.802909	-0.761638	-0.944372								DVL3	0.627837																				MOB1A	-0.663932
	FAP	0.794421	0.634521	0.80911		LPPR1	-0.803995	-1.18659	-1.05136								IFT20	0.6276																				PHACTR4	-0.664086
	GNA15	0.793034	0.751248	0.714808		SLC6A13	-0.806724	-0.759574	-0.800544								CD68	0.627433																				SNRPD3	-0.664104
	RAP2B	0.792445	0.755371	0.902217		CRYL1	-0.812316	-0.784839	-0.934278								TTC13	0.627141																				MTHFD1	-0.664194
	ELF3	0.787776	0.821584	0.84885		DMXL1	-0.823188	-0.760809	-1.14102								MAPK9	0.626894																				MAX	-0.664408
	CA4	0.770232	0.947	1.37798		HAGH	-0.827581	-0.666741	-0.884061								EVL	0.626794																				ACOT1	-0.664678
	TDO2	0.768944	0.705416	0.667381		FAH	-0.827583	-0.974557	-1.10513								RTEL1-TNFRSF6B	0.626684																				RB1CC1	-0.664751
	SCO2	0.766077	0.697096	0.743574		NFIB	-0.827808	-0.638798	-1.6365								UBE2D2	0.626635																				CDK14	-0.6655
	UBE3B	0.765953	0.847623	1.02822		CALML4	-0.827908	-0.740216	-1.11648								CAMTA2	0.626288																				SPOP	-0.666564
	HLA-DPA1	0.765552	0.707692	0.732153		PHYH	-0.828102	-0.84178	-0.884851								MCF2L	0.625687																				PSMB4	-0.667132
	DIRAS2	0.762847	0.755759	0.794902		MAF	-0.830864	-0.928436	-1.35428								SERPINB1	0.62446																				CLCN3	-0.667623
	MAPK13	0.762158	0.691469	0.822845		DIP2C	-0.840861	-1.01137	-0.833049								FGD1	0.624282																				ZKSCAN1	-0.667706
	PFKFB3	0.760413	0.831081	1.21627		MPDZ	-0.843036	-0.585013	-1.27685								SPATA2L	0.623966																				GDI2	-0.668149
	BICC1	0.756064	0.758767	1.42862		IQGAP2	-0.845182	-0.743709	-1.16841								ADAMDEC1	0.623855																				RAB5C	-0.668515
	QSOX1	0.754735	0.77071	1.24003		HSD17B14	-0.847481	-0.659738	-0.916289								GFPT2	0.623493																				CYP4F2	-0.668517
	CDKN2A	0.753329	0.669027	0.590826		ACOX2	-0.848224	-1.25425	-1.00216								PKIA	0.623183																				SUMO1	-0.668867
	CIITA	0.753043	0.614335	0.849201		GRHPR	-0.848465	-0.710655	-0.856728								OR7E47P	0.6231																				FAM13A	-0.669026
	IFITM1	0.748275	0.593369	0.641587		QPRT	-0.854799	-0.877627	-1.20614								KDM6A	0.622975																				DLD	-0.66954
	NCF1	0.747276	0.78032	0.627624		APOE	-0.858359	-1.1589	-1.14063								LOC157562	0.622672																				SNX1	-0.669635
	CCR5	0.746269	0.684279	0.738405		CAPN3	-0.861052	-1.43456	-1.41435								FAM193B	0.622604																				RBM8A	-0.670098
	MCTP1	0.745045	0.695252	0.741994		MAOA	-0.863183	-0.831569	-1.05297								CHKB-CPT1B	0.622516																				MYLK	-0.670762
	SYK	0.744127	0.738188	0.691439		ALDH7A1	-0.864786	-0.897215	-1.13086								PSD4	0.62242																				NSL1	-0.671081
	SLCO2B1	0.743454	0.749127	0.906741		ENTPD5	-0.865464	-0.700886	-1.00397								MTHFD1	0.621861																				LDB1	-0.671113
	CCL21	0.742705	0.71512	0.655679		SLC2A2	-0.86565	-1.26198	-1.17818								ACOX3	0.621246																				PFDN1	-0.671985
	LCP2	0.738323	0.728146	0.790389		QDPR	-0.868881	-0.982161	-1.08131								FOXM1	0.621217																				TMCO1	-0.671988
	INHBA	0.737517	0.883502	0.62072		SLC22A4	-0.869238	-0.979152	-0.818935								TMEM180	0.620746																				NDUFS2	-0.672015
	HPSE	0.735271	0.731065	0.809031		ACSM3	-0.870265	-0.777776	-1.27246								MAP4K3	0.619975																				PAPOLA	-0.672046
	ABLIM1	0.734385	0.83328	1.00638		SUGCT	-0.874557	-0.757795	-0.974458								CAD	0.618613																				DHFR	-0.673469
	XPNPEP1	0.733106	0.592989	-1.01786		GCDH	-0.874631	-0.825159	-0.767671								TOX3	0.618482																				RMDN1	-0.673643
	NCF4	0.732076	0.800023	0.744178		ALDH1B1	-0.874931	-0.968543	-0.866976								PSMB6	0.618188																				CNIH4	-0.673685
	LMCD1	0.731907	0.716942	0.8721		MCUR1	-0.875059	-0.624378	-0.949496								CNOT4	0.617973																				HSD17B11	-0.674635
	TMEM255A	0.730492	0.894327	0.67694		GLS	-0.876628	-0.755283	-1.0932								GALNT10	0.617326																				CBX5	-0.674695
	UPP1	0.730098	0.798507	0.651572		ACSF2	-0.878549	-0.8644	-1.02893								FLNC	0.617319																				CLPP	-0.675799
	PLXDC1	0.725506	0.820015	0.771545		SLC5A12	-0.882608	-0.674112	-1.09492								CROCCP2	0.617184																				TOMM20	-0.676241
	HPCAL4	0.723056	0.742081	1.01536		SLC35D1	-0.882754	-0.635649	-1.22268								GPC4	0.616786																				KLHL24	-0.67632
	BDKRB2	0.719462	0.807488	0.597735		LRRC19	-0.887199	-0.732358	-1.30032								FEM1C	0.615802																				RNF114	-0.676685
	CD3D	0.718736	0.589107	0.656628		ABCC6	-0.889454	-1.16129	-1.02071								WHSC1	0.615182																				PRPS1	-0.676697
	RPS10	0.716258	0.8317	0.867802		GLUD1	-0.894563	-0.968073	-0.612937								SLC7A5	0.614808																				SERINC3	-0.677266
	SASH3	0.712379	0.590471	0.879422		UGT1A1	-0.895959	-0.869754	-0.804217								MIER2	0.614524																				CADM1	-0.678577
	ADAMTS3	0.710475	0.773712	1.08407		AGMAT	-0.899247	-0.974441	-1.06695								LPAR2	0.613498																				PLA2G16	-0.679309
	CHST7	0.709019	0.695075	0.696982		ALAD	-0.902076	-0.897804	-1.12144								CDC25B	0.613347																				RIT1	-0.679476
	TLR5	0.706821	0.618589	0.968031		SLC17A5	-0.903832	-0.614346	-1.13837								PRR15L	0.613253																				RBKS	-0.679876
	PUS7	0.706569	0.67377	0.950091		PSAT1	-0.905218	-0.897438	-1.12945								TTK	0.612458																				ADI1	-0.680464
	DENND2A	0.706306	0.7055	0.885432		ABHD6	-0.908821	-0.967031	-1.59296								KLC2	0.61244																				CRK	-0.680499
	MFAP4	0.699337	0.850286	0.905193		SELENBP1	-0.910113	-0.948842	-0.931521								TICAM1	0.612412																				MAP3K5	-0.680729
	GPC1	0.693952	0.615469	0.628958		MAT2A	-0.921382	-0.669842	-0.870248								TBC1D9B	0.612043																				TPD52	-0.680792
	SOD3	0.692321	0.597169	0.703822		HRSP12	-0.922131	-0.955803	-0.967678								SERPING1	0.610688																				PIK3CD	-0.682796
	POLR1C	0.692127	0.606165	-0.610961		PRLR	-0.923217	-0.668983	-1.07715								CYBRD1	0.610124																				ARID4B	-0.684526
	TM6SF1	0.690404	0.726516	0.776192		ABHD14A-ACY1	-0.929189	-1.19891	-0.903388								TJAP1	0.60943																				HMGCR	-0.684738
	PPP1R1A	0.687266	0.708686	0.750862		EPHX2	-0.940226	-0.776286	-1.19493								SNAPC3	0.60936																				CSNK2A1	-0.685276
	RPL38	0.6848	0.930927	0.780403		MACROD1	-0.941149	-1.05058	-0.599398								TOB2	0.608891																				AGAP1	-0.686263
	DAZAP1	0.683497	0.596606	1.17727		ABAT	-0.941159	-0.887259	-1.36322								TECPR2	0.608827																				ILF3	-0.686327
	ITGB3	0.679682	0.802138	0.964763		KL	-0.942257	-0.789226	-1.09865								CTBP2	0.608457																				FGGY	-0.687224
	PIK3CD	0.675932	0.738693	0.80015		GSTM4	-0.945607	-0.723281	-0.802516								FGF2	0.608268																				STC1	-0.687233
	CRLF1	0.670002	0.634471	0.615747		ALDH3A2	-0.947693	-0.636199	-1.3091								KIF18B	0.608176																				AP5M1	-0.688294
	CKMT1A	0.662396	0.717373	0.639949		CES2	-0.947841	-0.903675	-1.27294								MGRN1	0.607792																				MYCBP2	-0.689394
	ELN	0.656687	0.614553	0.665423		ACOT13	-0.949035	-1.05081	-1.08813								PRKCZ	0.60775																				CYP20A1	-0.690981
	SLC35F2	0.653654	0.656959	0.915726		AKR7A3	-0.949281	-1.00543	-1.02909								CDK11A	0.60706																				ZNF654	-0.691571
	SLC7A11	0.650518	0.5988	0.59946		MTARC2	-0.949577	-0.919764	-0.886964								SUPT6H	0.606299																				ANP32A	-0.692403
	BID	0.64622	0.693362	0.681366		CYP4A11	-0.94974	-0.722367	-0.623452								ZNF672	0.605377																				DHRS12	-0.692629
	TLL2	0.643865	0.613521	0.744194		BHMT	-0.951567	-1.02511	-1.10034								EMX2	0.604921																				SLC28A2	-0.693208
	PDXK	0.640263	0.617065	0.777877		NPL	-0.956848	-0.937051	-1.41357								FRMD4B	0.604879																				HSP90B1	-0.69354
	IL1RN	0.633451	0.650874	0.717097		APOM	-0.957434	-1.15969	-0.789114								EHD2	0.604749																				ATXN1	-0.693757
	GGCX	0.632195	0.614504	0.932524		CYP4F3	-0.961669	-1.25868	-0.977601								YME1L1	0.604678																				HOXA7	-0.694574
	ITGB1BP1	0.631253	0.669508	-0.847548		RAB29	-0.969876	-1.01494	-1.52135								PGM1	0.604589																				RABGAP1	-0.697198
	HS3ST2	0.630417	0.622293	0.916291		AUTS2	-0.973769	-0.763054	-0.928322								FBXO38	0.604058																				PCCA	-0.697448
	ETV5	0.628815	0.68537	0.586034		PIPOX	-0.974223	-1.04718	-1.20292								NEK2	0.603796																				LIN7C	-0.697636
	ARHGAP26	0.628738	0.668692	0.824961		NET1	-0.977136	-0.869525	-0.866976								HDC	0.603557																				TFE3	-0.697979
	OGFOD3	0.627001	0.623778	0.996095		SLC13A3	-0.977314	-0.90185	-0.949262								NAA60	0.602997																				SEC14L1	-0.699324
	TFPI	0.625361	0.800661	0.816145		SULT1C2	-0.983588	-0.966748	-1.15373								SEMA4A	0.602801																				SNX2	-0.699672
	PLAUR	0.624457	0.58592	0.683966		ASS1	-0.985872	-0.983283	-1.05015								NFATC4	0.602756																				CITED2	-0.69994
	CACNA2D3	0.62417	0.762827	0.657695		BHMT2	-0.988754	-0.989934	-1.1098								LSM14A	0.602584																				TULP3	-0.700603
	ST3GAL5	0.598915	0.599559	0.708941		AGXT	-0.993123	-1.23437	-0.946683								ARNT2	0.60232																				NARS2	-0.700695
	CYTL1	0.596539	0.663605	0.779824		KHK	-0.99347	-1.16845	-1.11234								TOP3A	0.601737																				ENPP2	-0.701455
	RPL12	0.589905	0.587159	0.608009		CALM1	-1.00083	-0.727256	-1.01973								GPR153	0.60132																				CDKN2C	-0.702142
	CD302	0.587679	0.590278	0.617347		TMPRSS2	-1.00125	-0.600621	-0.735657								R3HDM4	0.601307																				COX11	-0.702426
	SET	-0.589463	-0.624439	-0.701772		DAO	-1.00432	-1.40792	-1.22292								NPM3	0.60113																				MBTPS1	-0.70278
	PCM1	-0.598583	-0.625401	-0.638245		RALYL	-1.00681	-0.861838	-1.03609								FKBP10	0.600927																				CFDP1	-0.703752
	FBXO3	-0.621023	-0.690495	-0.6035		ACSM2A	-1.00782	-0.802173	-1.42675								MZF1	0.600766																				PRR13	-0.704224
	NLK	-0.622476	-0.728832	-1.03196		DNMT3L	-1.01361	-1.0581	-0.670732								DBN1	0.599591																				GOLGA4	-0.704275
	H2AFV	-0.623396	-0.661111	-0.748893		GHR	-1.01423	-0.996345	-0.982367								MED7	0.599431																				GJB1	-0.705938
	PLEKHF2	-0.629928	-0.603968	-0.717054		CTH	-1.02013	-0.823906	-0.940204								ZC3H4	0.599282																				IPP	-0.70732
	SLC14A1	-0.632545	-0.909474	-1.41566		ALDH1L1	-1.02107	-0.852803	-0.923669								DPF2	0.598641																				ARF3	-0.707359
	SGK1	-0.633101	-0.602196	-0.810137		SLC7A9	-1.02186	-1.33233	-1.14838								LMNA	0.598556																				MTRR	-0.707382
	RAB11FIP2	-0.649629	-0.643882	-0.753074		ACAA1	-1.02315	-0.906386	-0.985109								CDK10	0.598456																				ACSS3	-0.707583
	GTF2A2	-0.658718	-0.593164	-0.916095		ASB9	-1.02516	-1.03002	-0.837561								FOLH1	0.598347																				PIH1D1	-0.707632
	PSMD6	-0.660608	-0.660497	-1.4227		GCH1	-1.02952	-0.79271	-0.983435								RARA	0.598317																				PHB	-0.707843
	RCHY1	-0.666578	-0.676298	-1.31527		OSBPL8	-1.03062	-0.75727	-1.58602								FAU	0.597584																				SSX2IP	-0.708448
	FBXO9	-0.673916	-0.706185	-1.47475		ACOT7	-1.03207	-0.910098	-1.4267								AK5	0.597457																				IMP3	-0.711401
	EZR	-0.67866	-0.707789	-1.42705		DHTKD1	-1.03288	-0.84351	-1.54184								GSTM5	0.596903																				PCCB	-0.712709
	ANKRD12	-0.686986	-0.71824	-1.93142		NQO2	-1.03697	-1.11485	-1.15498								RABL6	0.596871																				MAPK1IP1L	-0.71276
	SCARB2	-0.68766	-0.661645	-0.89996		SLC10A2	-1.0391	-1.28234	-1.26941								CA12	0.596583																				LYPLA1	-0.712991
	PDE4DIP	-0.696107	-0.981588	-2.08524		GLUD2	-1.03955	-0.932857	-1.02673								ATOX1	0.596216																				SYNJ1	-0.713053
	SYNE2	-0.704865	-0.628958	-0.670331		KNG1	-1.0426	-0.721033	-1.33653								SCAP	0.596119																				DFFA	-0.713955
	RAB14	-0.711872	-0.699297	-1.39502		DCXR	-1.04528	-1.2868	-0.886144								MAP4K1	0.595697																				CBR4	-0.714547
	ACTR2	-0.712041	-0.879424	-1.50204		PCK2	-1.04642	-1.27301	-1.09902								TBX21	0.595445																				CAPZB	-0.714787
	NEDD4L	-0.715039	-0.640617	-1.02393		MT1X	-1.05861	-0.706219	-0.686747								CARD10	0.595311																				FAM149A	-0.715031
	SMAD4	-0.718673	-0.748644	-0.600747		BPHL	-1.05875	-0.960042	-1.16962								SLC9A1	0.594678																				USO1	-0.715737
	PER3	-0.729568	-1.0023	-0.595687		GPR89A	-1.06172	-0.861351	-1.35087								CEP170	0.594199																				ABCB1	-0.716096
	TSPAN4	-0.730976	-1.01137	-1.24766		EPB41L3	-1.06494	-0.779041	-1.30148								TDRD12	0.594175																				PPP1R12A	-0.716502
	PRKCI	-0.733923	-0.71188	-0.849982		FBP1	-1.07081	-1.28698	-0.994841								EIF2AK2	0.594019																				UBE2H	-0.717282
	GLS	-0.734663	-0.644771	-0.677656		NPR3	-1.07147	-1.10362	-1.87086								SF3A2	0.593451																				TIMM23	-0.718526
	ADD3	-0.747937	-0.740667	-2.00493		DPP4	-1.07503	-0.846081	-1.24623								TNFAIP6	0.591949																				BNC2	-0.718741
	PSIP1	-0.751162	-0.714301	-1.14193		NIPSNAP1	-1.07732	-0.719026	-1.40835								DNAJB2	0.591874																				RBBP6	-0.718957
	SEL1L	-0.75332	-0.779	-0.842237		GPC3	-1.08874	-0.589826	-0.591351								APP	0.591847																				GTPBP8	-0.719729
	RNF13	-0.754387	-0.757187	-1.86529		COLEC11	-1.08978	-0.867692	-1.17839								CHMP1A	0.591521																				ERGIC2	-0.720146
	FGF9	-0.771359	-1.07645	-1.28017		GLYAT	-1.09296	-1.10652	-1.39139								PNPO	0.591349																				POLR2E	-0.720215
	HPS5	-0.780434	-0.631733	-0.933308		CYP3A4	-1.10662	-1.21964	-1.25877								MINK1	0.590702																				BCL10	-0.720352
	MYOZ1	-0.796775	-0.702176	-0.642714		RGCC	-1.11105	-0.722661	-0.853128								SIPA1	0.590605																				ZNF646	-0.72067
	BMP7	-0.798277	-0.653036	-0.61085		GPD1	-1.11334	-0.968224	-1.35888								FPGS	0.590323																				CTDSPL	-0.721108
	ERBB2IP	-0.801811	-0.769544	-0.869481		SH3GL2	-1.1158	-0.945838	-1.01276								IGFBP7	0.589693																				GNL3L	-0.721323
	KIAA0368	-0.802467	-0.692853	-1.49532		FOLH1B	-1.12098	-1.11794	-1.2252								CACFD1	0.589393																				FLRT3	-0.722046
	MME	-0.808178	-0.759883	-0.609231		FOLH1	-1.12431	-1.15521	-1.47353								NISCH	0.588981																				BCLAF1	-0.724504
	RDX	-0.80922	-0.591108	-1.12309		SLC34A1	-1.12617	-1.06708	-1.09807								HIF3A	0.588501																				NEK1	-0.725021
	MPDZ	-0.810928	-0.936638	-1.53435		METTL21B	-1.13089	-0.852354	-0.594998								SLC24A3	0.58829																				USH1C	-0.725072
	BTG3	-0.819072	-0.831091	-1.02652		CYP3A7-CYP3AP1	-1.13345	-1.19963	-1.19307								COPG2IT1	0.588283																				TPRKB	-0.725749
	TXNIP	-0.820759	-0.779631	-1.14636		SERPINA6	-1.13704	-1.20495	-1.20582								TRIP13	0.588049																				KPNA3	-0.726212
	NUCB1	-0.835068	-0.72585	-0.757623		KYNU	-1.13797	-1.27013	-1.35891								MYCL	0.58782																				TMEM254	-0.727322
	CITED2	-0.846123	-0.664434	-1.06296		PPP1R16B	-1.13945	-0.805377	-0.802721								LAMP2	0.587808																				ATF6	-0.728333
	YES1	-0.858317	-0.977414	-1.26637		HADH	-1.13954	-0.938707	-1.37146								TGFB3	0.587774																				WWTR1	-0.729092
	GOLIM4	-0.86448	-1.02573	-1.72428		DIO1	-1.14935	-1.38529	-1.43146								C1RL	0.587774																				USP33	-0.73049
	WWP1	-0.880824	-0.799983	-0.916457		ASPA	-1.14949	-0.971502	-1.22755								MAPK7	0.587548																				RAB7A	-0.730708
	PHACTR4	-0.881103	-0.927372	-1.39962		EAF2	-1.15205	-0.984285	-1.12617								SARM1	0.586925																				KPNA6	-0.730921
	TPPP3	-0.897094	-0.81261	-1.75676		ARG2	-1.15746	-0.829773	-1.05336								GAPVD1	0.586578																				AMZ2	-0.731183
	CTNNBIP1	-0.902937	-0.607401	-1.09137		DPYS	-1.16103	-0.973057	-1.2363								CHPF	0.586377																				METTL9	-0.73127
	SLC26A4	-0.927163	-0.651528	-0.662258		CUBN	-1.16179	-1.0503	-1.48517								SLC2A1	0.586236																				ATP6V1E1	-0.732034
	VEGFA	-0.92922	-1.20179	-1.55723		SLC2A5	-1.16814	-0.919382	-1.26347								NUP133	0.586221																				PEX3	-0.733132
	ZNF91	-0.942468	-1.14189	-1.17068		SOWAHC	-1.1694	-0.649563	-1.33931								PIBF1	0.585775																				FH	-0.733358
	SBSPON	-0.948929	-0.673108	-0.693513		TRPM3	-1.17031	-0.890838	-1.47063								ZNF44	-0.585984																				STX16	-0.733588
	CLIC5	-0.950574	-0.867432	-1.73341		MAPT	-1.18327	-0.800635	-1.27107								NOL12	-0.586904																				C1D	-0.734483
	DDX3X	-0.963349	-0.930103	-0.875965		DAB2	-1.20248	-0.817822	-2.15503								ATF2	-0.587029																				POLR2J	-0.734934
	SLC7A8	-0.972258	-0.675372	-1.51161		CYP3A7	-1.2054	-1.36627	-1.30126								KPNA3	-0.587351																				SART3	-0.734992
	FBXO17	-0.981339	-0.806959	-1.40002		DPEP1	-1.2082	-1.42973	-0.968759								POLR2B	-0.587495																				GGCX	-0.735001
	BST1	-0.98636	-0.688954	-1.29499		ADD3	-1.21473	-1.07473	-1.96132								NDUFS1	-0.587555																				DDA1	-0.73515
	KLK7	-0.987105	-0.736348	-1.78405		SLC37A4	-1.2194	-0.89795	-1.27111								PPARG	-0.58858																				TMBIM6	-0.736083
	ARHGEF26	-0.999533	-0.589641	-0.65123		SMPDL3A	-1.21999	-1.21738	-1.57896								TIA1	-0.588582																				CTSL	-0.736677
	SMARCA2	-1.00034	-0.74761	-1.09618		DDC	-1.22038	-1.20313	-1.78175								AGFG1	-0.588649																				MPHOSPH8	-0.736779
	FRY	-1.01299	-0.896481	-1.71786		AZGP1	-1.22786	-1.08276	-1.7214								ARPP19	-0.588917																				ETFA	-0.738624
	PKP4	-1.01568	-0.601612	-1.42662		SLC12A3	-1.22897	-0.748088	-0.759321								ATP5B	-0.588959																				DDT	-0.738636
	CR1	-1.02951	-0.620554	-1.05329		XPNPEP2	-1.2297	-1.11336	-1.22781								GADD45A	-0.589092																				MGMT	-0.739069
	EPB41L5	-1.0622	-0.778989	-2.0958		PRODH2	-1.23332	-1.11884	-0.979294								FLT1	-0.589207																				F11R	-0.740179
	EMCN	-1.06264	-1.74355	-1.65533		CALML3	-1.23554	-1.33379	-0.821063								MRS2	-0.589257																				SNAP23	-0.740218
	LRRC2	-1.08438	-1.07168	-0.712909		HAO2	-1.23738	-1.45704	-1.19375								STUB1	-0.58931																				NUDT21	-0.741718
	GK	-1.09723	-0.87257	-0.687039		SLC22A6	-1.23828	-1.2113	-1.3565								HMGB1	-0.589394																				G3BP2	-0.742265
	CERS6	-1.09981	-0.829357	-1.03328		KMO	-1.23944	-1.56801	-1.66287								GPS1	-0.589904																				ALDH9A1	-0.744072
	FYN	-1.10446	-0.80358	-1.53594		LPL	-1.24405	-0.874883	-0.933901								PSMD10	-0.589953																				HSPA4	-0.744573
	THSD7A	-1.12582	-1.30533	-2.0294		UPB1	-1.24688	-1.49487	-1.21944								HMGN1	-0.590195																				TRAPPC8	-0.744627
	TGFBR3	-1.1285	-0.921431	-1.50273		RAB11FIP3	-1.24732	-1.29773	-1.19426								KIDINS220	-0.59028																				MTF2	-0.744675
	GULP1	-1.13035	-0.897005	-1.53645		ANK2	-1.25178	-1.50569	-1.07553								ETS2	-0.590384																				PEX10	-0.744792
	DACH1	-1.1398	-0.861839	-2.24131		GK3P	-1.2652	-0.920514	-1.36716								VTI1B	-0.590482																				PIGK	-0.745189
	IGFBP5	-1.14444	-1.73322	-3.16032		SLC7A7	-1.27463	-1.06082	-1.40866								ABCD3	-0.590554																				LRRFIP1	-0.747172
	COL4A3	-1.16525	-1.06894	-2.45509		VEGFA	-1.29034	-1.06881	-1.35498								WDR59	-0.590807																				BSG	-0.747279
	ARHGAP19	-1.17983	-1.00634	-1.63548		PTGER3	-1.29098	-0.600912	-1.17								EIF2S3	-0.591279																				FAM45A	-0.749064
	ENPEP	-1.19194	-1.31128	-1.19594		SLIT2	-1.31979	-0.878357	-1.50089								NAAA	-0.591514																				TRAPPC3	-0.749464
	HPGD	-1.20286	-1.53099	-1.04599		AK4	-1.32222	-1.07837	-1.70261								UBE2B	-0.592347																				SLC31A1	-0.749627
	SEMA5A	-1.21153	-1.14276	-2.121		PLG	-1.32827	-1.2069	-1.44672								CLIP4	-0.59242																				HSPA9	-0.749779
	CACNB2	-1.22615	-1.05836	-1.65577		RNF186	-1.3362	-0.816354	-1.01382								CRYL1	-0.592486																				SEC31A	-0.750133
	USP46	-1.23028	-0.803477	-1.13398		SORD	-1.33915	-1.15601	-1.45764								ACYP1	-0.592548																				BTG1	-0.751452
	NEBL	-1.23135	-1.16382	-1.10479		ZNF91	-1.34715	-1.09876	-1.96878								FOCAD	-0.592768																				CMTM6	-0.752026
	CHI3L1	-1.25963	-0.891789	-0.859352		AOC1	-1.34765	-1.96094	-1.38124								KRIT1	-0.593525																				TPP1	-0.752112
	PCMTD2	-1.26431	-1.22104	-1.2609		GK	-1.36254	-1.1808	-1.64242								ACOX1	-0.59359																				TTC37	-0.754459
	TNNI1	-1.27013	-1.01009	-1.89151		GSTA1	-1.36536	-1.52501	-1.33524								PIH1D1	-0.593794																				PTPN4	-0.755323
	LOX	-1.27165	-1.01434	-0.99355		HPGD	-1.37417	-1.23467	-1.08664								ZFAND3	-0.594286																				CNOT7	-0.755428
	TSC22D3	-1.27249	-0.620835	-1.55913		PLEKHB2	-1.3876	-0.668671	-2.16867								KAT5	-0.595132																				MRPL13	-0.756001
	NPHS1	-1.27946	-1.30101	-1.34848		TGFBR3	-1.39363	-0.81414	-1.1461								COPS6	-0.595751																				OXA1L	-0.756861
	AIF1	-1.2852	-1.1782	-1.16048		SLC25A36	-1.42211	-0.734718	-2.36807								JAM3	-0.59581																				ELAVL3	-0.757285
	FAM134B	-1.34214	-1.17263	-1.84948		ANGPTL3	-1.42604	-1.56201	-1.87582								STX16	-0.595812																				SMAD1	-0.758233
	HRSP12	-1.3746	-1.01626	-0.811974		ALDOB	-1.43971	-1.3606	-1.47966								MPHOSPH10	-0.59602																				CBR1	-0.760287
	DPP6	-1.38574	-1.24343	-0.915143		G0S2	-1.46095	-1.2247	-0.843046								TMEM204	-0.596229																				RUFY3	-0.761502
	PLCE1	-1.39657	-0.909092	-1.80042		APOH	-1.46632	-1.14547	-1.23505								ARL2BP	-0.596252																				RIOK3	-0.761532
	TNNT2	-1.41076	-1.1136	-1.63624		EGF	-1.50654	-1.35943	-1.28731								ZC2HC1A	-0.596322																				MTUS1	-0.762805
	GATM	-1.51937	-0.985386	-0.868226		PAH	-1.50809	-1.36716	-1.4428								KIAA1279	-0.596802																				MTCH2	-0.762824
	CA10	-1.57321	-1.24205	-1.03394		HRG	-1.51052	-0.986512	-1.1242								FAM168A	-0.596947																				ATP5S	-0.762954
	B3GALT2	-1.59335	-1.34016	-1.29245		PVALB	-1.53853	-1.12985	-1.09293								NAALADL1	-0.597072																				MRPL42	-0.76392
	HAO2	-1.61673	-1.27741	-0.828256		MME	-1.55269	-1.34265	-1.47815								GAR1	-0.597084																				LPP	-0.764715
	ADCY1	-1.64288	-1.17703	-0.714723		ADM	-1.55379	-0.711149	-1.37094								INSR	-0.597273																				ACBD3	-0.764976
	CA2	-1.6554	-1.72245	-1.16765		HPD	-1.6429	-1.54028	-1.5838								GARS	-0.597727																				LRP2	-0.765498
	LPL	-1.7167	-1.42552	-1.32761		THY1	-1.64515	-1.19717	-2.01302								QDPR	-0.59781																				PPP6C	-0.766517
	FBXO21	-1.85324	-0.908282	-2.82878		AFM	-1.6503	-1.1945	-1.38268								GALNT2	-0.598433																				SS18	-0.767095
	ALDOB	-1.85793	-1.0383	-1.54775		CTSV	-1.65412	-1.51854	-1.66948								NDUFB8	-0.598557																				CSRP2	-0.76718
	CTSV	-2.19349	-1.65299	-2.48307		ALDH6A1	-1.72018	-1.46412	-1.81815								PITPNB	-0.598646																				UROD	-0.771313
						LPA	-1.74648	-1.41131	-2.04342								MOAP1	-0.598761																				CRYZL1	-0.771359
						FABP1	-1.78915	-1.61623	-1.89359								URI1	-0.598828																				ANP32B	-0.77169
						WT1	-1.79284	-0.915574	-1.40325								MATK	-0.598836																				ZC3H14	-0.775854
						KLK1	-1.85554	-2.02953	-1.05299								VPS35	-0.599174																				TTF1	-0.776566
						SLC4A4	-1.87159	-1.25554	-2.43654								VAMP5	-0.59947																				NIT2	-0.77695
						FBXO21	-1.89869	-1.0339	-2.10294								TAP2	-0.601409																				PALLD	-0.777424
						PCYOX1	-1.91935	-0.789679	-2.99716								CCDC51	-0.601443																				TMED2	-0.778913
						CYP27B1	-1.9857	-0.994999	-0.867447								CFLAR	-0.601516																				ZNF22	-0.779404
						G6PC	-2.12006	-1.21241	-1.83676								RAB3GAP1	-0.601671																				KCNJ15	-0.779454
						NDNF	-2.4468	-0.975171	-1.24541								ZNF227	-0.601866																				CCND1	-0.780183
						FGF1	-2.5634	-1.34088	-1.61777								UBL3	-0.602182																				ACAP1	-0.780868
						PCOLCE2	-2.64658	-1.05477	-1.57698								ZNF45	-0.602298																				NDRG2	-0.780868
						CLIC5	-2.87936	-1.68588	-2.25522								ICT1	-0.604179																				TMEM47	-0.781898
						ALB	-2.93672	-1.67073	-2.38024								PRKG1	-0.604489																				MAP2K7	-0.782319
						NPHS2	-3.19588	-1.65611	-1.90414								ZC3HAV1	-0.604761																				LMAN1	-0.782334
	DEG, Differential expressed genes; H, healthy controls; DN, diabetic nepropathy; MN, membranous nephropathy.																TRAPPC3	-0.60512																				KPNA4	-0.782607
	Data were expressed as Log2Foldchange																TP53BP2	-0.605389																				MBD4	-0.784397
																	COQ9	-0.606098																				RRAS2	-0.786052
																	WDR1	-0.606236																				PRRC2A	-0.786154
																	ACOX2	-0.607121																				LAMP1	-0.786294
																	BPHL	-0.607452																				TRIM2	-0.787639
																	PPP1R2	-0.609434																				PAAF1	-0.787684
																	MAFB	-0.609529																				ENPP1	-0.787685
																	WBSCR16	-0.609892																				ATP6V1D	-0.788268
																	RNPEP	-0.610066																				NFATC3	-0.78838
																	LPCAT3	-0.610246																				TNPO2	-0.79027
																	CCT7	-0.610259																				NAT1	-0.790578
																	CPNE1	-0.610546																				AP1S1	-0.791588
																	PSMD3	-0.610717																				SLC25A13	-0.79393
																	ASMTL	-0.611226																				TAF9B	-0.794518
																	MED21	-0.611744																				MRPS28	-0.79486
																	PIN1	-0.611843																				TIMM13	-0.79565
																	BAMBI	-0.612107																				PLEKHA5	-0.797746
																	HEXA	-0.612146																				GALK2	-0.79828
																	ANKMY2	-0.61249																				NKTR	-0.798558
																	FOXO4	-0.613773																				SHMT2	-0.799504
																	GHITM	-0.613805																				COPS8	-0.801519
																	ALDH1A1	-0.614527																				TERF1	-0.803024
																	DENND4C	-0.614701																				SERTAD2	-0.803693
																	LARP4B	-0.614903																				ZNF271	-0.806111
																	MAN2A2	-0.614994																				ACP1	-0.806972
																	DSTN	-0.615051																				RNF167	-0.807497
																	TRIM21	-0.615281																				HAB1	-0.807525
																	MNAT1	-0.61596																				RNF146	-0.808876
																	RBFOX1	-0.616141																				BSDC1	-0.809017
																	SLC25A32	-0.617268																				HSPH1	-0.809378
																	KLF13	-0.617701																				FEZ2	-0.809989
																	JAK2	-0.618468																				SPEN	-0.811367
																	UBC	-0.618473																				MITF	-0.811536
																	SERPINE1	-0.619023																				CACYBP	-0.812133
																	ITM2A	-0.61926																				BZW1	-0.812518
																	GNAS	-0.619918																				DNAJC7	-0.812901
																	LAP3	-0.619958																				SUV420H1	-0.813255
																	STIP1	-0.620156																				CD46	-0.814703
																	HNRNPA2B1	-0.620218																				ILF2	-0.814823
																	FDFT1	-0.620314																				OGFR	-0.815767
																	PPA1	-0.620481																				ACAA2	-0.816527
																	TMEM5	-0.620722																				RTCA	-0.816709
																	LOC730101	-0.620823																				SORBS2	-0.817352
																	EIF3D	-0.621142																				PDLIM5	-0.8179
																	SRSF4	-0.621562																				POLR2K	-0.821856
																	HBP1	-0.62182																				PIK3R1	-0.822063
																	PYROXD1	-0.621857																				MRPL22	-0.823678
																	USP33	-0.621947																				TWF1	-0.824897
																	STRN	-0.622348																				KRR1	-0.828325
																	ADH5	-0.622399																				PUM1	-0.828905
																	CYB561D2	-0.622909																				DNAJC6	-0.831647
																	KLK6	-0.62306																				SEPT5-GP1BB	-0.83286
																	CDC123	-0.623122																				CPT2	-0.833416
																	HSPA4	-0.623234																				TFPI	-0.833682
																	CTSL	-0.62356																				ATM	-0.834597
																	SPTLC2	-0.623738																				BFAR	-0.835089
																	NDUFB7	-0.623999																				ANAPC5	-0.836553
																	TMCC1	-0.624053																				RGL1	-0.838003
																	DLST	-0.624289																				NNT	-0.838452
																	CDV3	-0.625459																				ARL6IP5	-0.840021
																	GGA2	-0.625627																				CHD4	-0.840782
																	CHMP5	-0.625836																				PROC	-0.841142
																	UBA2	-0.625866																				ZBTB7A	-0.841321
																	CREBL2	-0.626274																				LIAS	-0.843007
																	POLR3K	-0.626945																				LAMP2	-0.843725
																	ECHDC2	-0.627092																				EID1	-0.845711
																	PLBD1	-0.627228																				PQBP1	-0.845895
																	ATM	-0.627715																				PAWR	-0.847085
																	CHMP1B	-0.628304																				PIK3CA	-0.847114
																	MATRC2	-0.628821																				HOOK1	-0.84935
																	B4GALT4	-0.629178																				ING3	-0.849364
																	EDEM3	-0.629535																				KDELR1	-0.850149
																	CAPRIN1	-0.629645																				RHEB	-0.852738
																	MSH2	-0.629743																				RBMS1	-0.852822
																	MSH6	-0.630457																				PPP2R5E	-0.854129
																	NFE2L2	-0.63054																				DERA	-0.855354
																	EXOSC7	-0.631488																				ALCAM	-0.857203
																	ABCD4	-0.631824																				TUG1	-0.858118
																	TSPAN2	-0.632072																				UQCRB	-0.860207
																	GFOD1	-0.63231																				FMO2	-0.860302
																	SRSF1	-0.632544																				CPPED1	-0.865597
																	ST6GAL1	-0.632731																				PRKAR1A	-0.868138
																	LIG4	-0.632951																				ERLIN1	-0.869463
																	DEGS1	-0.633446																				PRDX2	-0.870423
																	NCBP2	-0.633806																				CHMP2B	-0.877099
																	VAPB	-0.634312																				GRB2	-0.878542
																	FOXO1	-0.634466																				PLEKHA1	-0.881467
																	PARP4	-0.634848																				MAP9	-0.8824
																	NOTCH2NL	-0.63604																				ATP6V1C1	-0.882899
																	AGPS	-0.636316																				LACTB2	-0.883254
																	CRIP2	-0.636436																				HSPE1-MOB4	-0.884267
																	WDR41	-0.636751																				SMARCC1	-0.886635
																	FTL	-0.637505																				PARD3	-0.890753
																	WIPI2	-0.637571																				PRKAA2	-0.891417
																	TRIM27	-0.63768																				PTAFR	-0.891745
																	TOX4	-0.637721																				SRPK2	-0.89201
																	SCFD1	-0.638294																				ARMCX3	-0.892876
																	ZKSCAN1	-0.638326																				CRBN	-0.895028
																	NEK1	-0.638452																				PSMC2	-0.908028
																	APBB2	-0.639338																				ATG12	-0.909038
																	MRPL9	-0.639673																				L3MBTL1	-0.914977
																	MPC2	-0.640439																				PDPK1	-0.918036
																	CBX7	-0.641285																				CUL5	-0.919471
																	PPIH	-0.641613																				SAP18	-0.920284
																	NPR1	-0.642255																				GPC5	-0.922305
																	COMMD10	-0.642505																				RAB2A	-0.923217
																	ASXL2	-0.642962																				CEP350	-0.924432
																	ITPR1	-0.643375																				PBX1	-0.927688
																	CBX6	-0.644113																				SEL1L	-0.938373
																	VCL	-0.644526																				PKN2	-0.940606
																	PARL	-0.644805																				ANKRD11	-0.941064
																	FDX1	-0.645548																				RRAGD	-0.942406
																	ALCAM	-0.645841																				SDHC	-0.943865
																	MTPAP	-0.645843																				DNAJC8	-0.944891
																	SRSF5	-0.647082																				PSMD1	-0.948242
																	MPDU1	-0.647405																				TMEM251	-0.949726
																	MLX	-0.64785																				VNN1	-0.951302
																	GPATCH8	-0.64794																				ADNP2	-0.951683
																	FEN1	-0.648412																				GNAQ	-0.952207
																	PTGER3	-0.649786																				DLG4	-0.953899
																	AUP1	-0.650234																				TMEM106B	-0.95517
																	DDX41	-0.650316																				GNS	-0.955195
																	EIF3E	-0.650376																				FAM120A	-0.956915
																	NFIC	-0.650612																				ABHD2	-0.956976
																	ZMYND11	-0.650808																				NAT8	-0.958871
																	GALK2	-0.650841																				MAN2A1	-0.964233
																	FCHSD2	-0.651368																				ZNF652	-0.967344
																	JMJD6	-0.651597																				SCYL2	-0.96755
																	FLII	-0.65164																				DHX9	-0.969417
																	PRKCD	-0.652761																				SNTB2	-0.975538
																	VGLL4	-0.653027																				MCFD2	-0.975626
																	ZNF671	-0.653209																				RHOQ	-0.993292
																	MTCH2	-0.654027																				VAMP3	-0.993383
																	BSG	-0.654096																				RSRC1	-0.998637
																	DUSP3	-0.654282																				RNF13	-0.999591
																	PRPSAP2	-0.654345																				YY1	-1.00121
																	TAF9B	-0.654468																				LYRM2	-1.00402
																	STT3A	-0.654733																				ARMC1	-1.00516
																	SECISBP2L	-0.654957																				DENND1B	-1.01065
																	CEP57	-0.655636																				NUCKS1	-1.01177
																	SETX	-0.656013																				TFAM	-1.01358
																	PLAT	-0.656113																				OXR1	-1.01384
																	KAT6A	-0.656893																				NR3C1	-1.01402
																	SERGEF	-0.65818																				SYNJ2BP	-1.01825
																	ACOT1	-0.658324																				RAB1A	-1.01885
																	PPM1G	-0.658647																				FUT3	-1.02315
																	ATXN2	-0.658652																				SMAD5	-1.03311
																	TRPC1	-0.659016																				SYNCRIP	-1.04024
																	GLOD4	-0.659686																				KRIT1	-1.04328
																	ZNF3	-0.659691																				YIPF5	-1.04469
																	TUSC2	-0.661046																				QKI	-1.06671
																	GABARAPL2	-0.661255																				RBM47	-1.07
																	MECR	-0.661364																				EGFR	-1.07057
																	PRMT2	-0.661748																				THOC2	-1.07516
																	RPLP0	-0.661972																				KHDRBS1	-1.0754
																	TMED9	-0.662527																				GOSR1	-1.07766
																	CDKN2AIP	-0.662699																				ZBTB38	-1.07772
																	ADD1	-0.662854																				RBM25	-1.07839
																	TACC1	-0.663756																				RAP2A	-1.08297
																	STX4	-0.664708																				BPTF	-1.08639
																	GPKOW	-0.664759																				NUDT3	-1.09933
																	RMND5A	-0.664784																				ZNF124	-1.1021
																	POFUT1	-0.66499																				M6PR	-1.10978
																	CAST	-0.666556																				AASDHPPT	-1.13152
																	HLA-E	-0.667009																				BBX	-1.1344
																	HLA-DRA	-0.667229																				SON	-1.13662
																	TM2D1	-0.66846																				TNPO3	-1.14877
																	TBL1XR1	-0.66922																				IGF2R	-1.15451
																	PPP3CC	-0.669347																				LIMCH1	-1.1571
																	HEG1	-0.671609																				SERPINI1	-1.16713
																	ESD	-0.671939																				SKAP2	-1.17113
																	APPL2	-0.672172																				NREP	-1.17123
																	MIEF1	-0.672469																				BRD2	-1.17451
																	SMAD5	-0.67278																				BRCC3	-1.17976
																	HMG20B	-0.672784																				SERBP1	-1.18953
																	GALNT11	-0.674046																				PWP1	-1.1954
																	SH3BGRL	-0.674159																				USP1	-1.20106
																	PDPN	-0.674709																				DNAJC22	-1.22131
																	ARFGEF1	-0.674919																				NAA35	-1.22387
																	QPRT	-0.674923																				ANKHD1	-1.22581
																	HNRNPDL	-0.675091																				PRPF40A	-1.24826
																	ABI1	-0.675388																				EPRS	-1.2789
																	MRFAP1L1	-0.675391																				SSB	-1.28729
																	UBXN7	-0.676415																				ESF1	-1.29664
																	LAMTOR3	-0.677204																				KRAS	-1.30269
																	MEIS3P1	-0.677496																				CEP57	-1.34398
																	ZNF277	-0.678089																				COL4A3BP	-1.34763
																	SMAD2	-0.679044																				RALBP1	-1.36376
																	TARS	-0.679924																				NAA15	-1.36407
																	DUT	-0.679943																				MBP	-1.385
																	BCL2L2	-0.680719																				MYH10	-1.41208
																	KATNA1	-0.680733																				ZNF148	-1.46764
																	ATP8B1	-0.680836																				SMC3	-1.46909
																	TBL1X	-0.681398																				LEPROT	-1.51961
																	ERP44	-0.681402																				UGCG	-1.52225
																	POT1	-0.682076
																	ENSA	-0.684239
																	NASP	-0.684467
																	ARL1	-0.684595
																	ZNF654	-0.684673
																	ABHD17A	-0.684743
																	JOSD1	-0.685002
																	AHSA1	-0.685438
																	ZNF652	-0.685576
																	NBR1	-0.685599
																	UBE2L3	-0.686486
																	TMX2	-0.686804
																	TMX1	-0.686924
																	RNF19A	-0.687693
																	ATP6V1B2	-0.688283
																	BLMH	-0.688394
																	KARS	-0.688618
																	UQCRC1	-0.688841
																	DNAJC16	-0.689498
																	PIK3CA	-0.689616
																	SGCB	-0.689966
																	RGP1	-0.690655
																	HIBCH	-0.692647
																	KIFAP3	-0.693334
																	ATP6V1H	-0.694342
																	SMARCA1	-0.694387
																	PHKB	-0.69459
																	USP47	-0.6946
																	GLT8D1	-0.695354
																	CPM	-0.695544
																	HBS1L	-0.695637
																	CPT1A	-0.695978
																	WNT3	-0.696375
																	CTNNBL1	-0.696425
																	NGDN	-0.696899
																	UROD	-0.697023
																	CD151	-0.697196
																	DAP3	-0.697353
																	UBR5	-0.69739
																	NCAM1	-0.697541
																	PPP2R5E	-0.697922
																	BTF3	-0.698232
																	CCDC53	-0.698321
																	MAPKAP1	-0.698455
																	CIR1	-0.698462
																	PCCB	-0.69858
																	LPP	-0.698643
																	EI24	-0.699128
																	DDX21	-0.699335
																	YLPM1	-0.699416
																	ANAPC5	-0.700158
																	BTN2A2	-0.701594
																	XRCC6	-0.702087
																	ERBB3	-0.703983
																	SRSF7	-0.704049
																	GLRX	-0.704591
																	KIAA0040	-0.704765
																	SLC25A1	-0.704924
																	ATP5S	-0.704964
																	ATP1A2	-0.705401
																	CCNG2	-0.70589
																	SCP2	-0.706672
																	YIPF3	-0.707012
																	XRCC5	-0.707384
																	PPID	-0.709445
																	RSRC2	-0.70966
																	ZNF12	-0.710074
																	HIST1H2BD	-0.710275
																	METAP1	-0.710425
																	GPD1	-0.710601
																	KIF3B	-0.711055
																	ATXN10	-0.711464
																	MIA3	-0.712069
																	FKBP2	-0.712085
																	GOLGA2	-0.7129
																	GALC	-0.715093
																	FAM63B	-0.715598
																	USP4	-0.716228
																	SPIN1	-0.716493
																	KPNA6	-0.717075
																	IMPA2	-0.717582
																	GPR161	-0.718082
																	IARS2	-0.719067
																	PIAS1	-0.719628
																	UBE2M	-0.720306
																	PCBP1	-0.721475
																	ZBTB1	-0.723569
																	HNRNPH1	-0.724487
																	SDHA	-0.724832
																	PPIE	-0.726031
																	TFCP2	-0.727911
																	AP3B1	-0.728089
																	PLCL2	-0.728272
																	AKAP2	-0.728822
																	PIGC	-0.729907
																	PPP2R1A	-0.730423
																	CCT6A	-0.730589
																	RSRC1	-0.731692
																	DNAJC8	-0.732271
																	SMYD2	-0.732676
																	TMEM30A	-0.73308
																	LITAF	-0.733764
																	AK6	-0.734522
																	PSMG1	-0.734719
																	PPP5C	-0.734915
																	DGUOK	-0.736383
																	WTAP	-0.737209
																	OSTF1	-0.737223
																	NBN	-0.737299
																	AKAP8L	-0.737502
																	CUL2	-0.73797
																	FAIM	-0.738049
																	UGP2	-0.738805
																	ACYP2	-0.739252
																	OXR1	-0.739409
																	HMGXB4	-0.739684
																	FIS1	-0.739859
																	PPFIA1	-0.740048
																	PRPF19	-0.740758
																	DHX35	-0.741478
																	HNRNPAB	-0.741902
																	H2AFY	-0.742139
																	RRAS2	-0.742757
																	RC3H2	-0.742882
																	RAB5A	-0.743739
																	SEPTIN2	-0.743824
																	NGRN	-0.743881
																	GOSR1	-0.744122
																	PRPS1	-0.744132
																	MDH1	-0.744314
																	UBE4B	-0.744531
																	NDUFS2	-0.744848
																	ALG5	-0.74529
																	MRPL39	-0.746401
																	NES	-0.747486
																	MRPL40	-0.747725
																	PDAP1	-0.747734
																	CHMP2B	-0.747955
																	MPV17	-0.7481
																	MTX2	-0.748284
																	PSMF1	-0.748381
																	RPS6KA2	-0.75115
																	COMMD4	-0.751572
																	RUNX1T1	-0.751739
																	SUZ12	-0.751791
																	TALDO1	-0.752024
																	CLCN3	-0.75233
																	GRK5	-0.752389
																	HAGH	-0.753003
																	TARDBP	-0.754837
																	VDAC2	-0.756196
																	HSBP1	-0.756769
																	HMGCR	-0.757978
																	ADM	-0.758188
																	FBXW2	-0.759613
																	NR1D2	-0.761481
																	IVNS1ABP	-0.761551
																	SCRN1	-0.761591
																	NEK7	-0.761728
																	SART1	-0.76287
																	GRHPR	-0.763363
																	MTMR2	-0.763915
																	APOO	-0.765597
																	TOR1A	-0.765634
																	SETD2	-0.765958
																	NDUFS3	-0.766416
																	SYNE1	-0.766532
																	MCM7	-0.766571
																	CHD9	-0.767164
																	PIGF	-0.767609
																	MYCBP2	-0.767631
																	PRNP	-0.769088
																	UBE2J1	-0.769127
																	LIN7C	-0.769688
																	INPP5K	-0.770555
																	PSMB7	-0.771922
																	ASF1A	-0.772479
																	PRPF18	-0.772722
																	ACP1	-0.772872
																	TMED2	-0.772971
																	ACAA2	-0.773532
																	ETFDH	-0.774605
																	FLNA	-0.774629
																	ENPP4	-0.775065
																	TMEM50A	-0.777263
																	GGCT	-0.777549
																	DDX24	-0.778476
																	ERCC5	-0.778513
																	OSER1	-0.778909
																	TBXAS1	-0.779008
																	NUDT9	-0.780614
																	UVRAG	-0.781249
																	H2BFS	-0.781796
																	XAF1	-0.782077
																	ARHGEF3	-0.78275
																	TIE1	-0.783216
																	MED6	-0.783225
																	CDA	-0.783915
																	IFT27	-0.78411
																	DCAF6	-0.784136
																	ZC3H7A	-0.78416
																	TMEM140	-0.784487
																	TPT1	-0.785383
																	DESI2	-0.787239
																	AOX1	-0.787614
																	RETSAT	-0.788126
																	NPM1	-0.788702
																	POR	-0.789273
																	CMAS	-0.789339
																	SLC25A28	-0.789385
																	ACAD8	-0.790199
																	SLC25A20	-0.790458
																	PINK1	-0.790661
																	KRR1	-0.791051
																	BTN2A1	-0.791631
																	ERMP1	-0.792495
																	MRPS28	-0.79332
																	KCTD9	-0.794432
																	CA11	-0.795698
																	FASTKD5	-0.795728
																	CCNT2	-0.795945
																	U2AF1	-0.796498
																	UBAP2L	-0.796755
																	NUCKS1	-0.797937
																	CALU	-0.798848
																	RBL2	-0.799349
																	RMND1	-0.799514
																	EIF2S2	-0.799662
																	NRIP1	-0.799808
																	REEP5	-0.800557
																	BMPR2	-0.802614
																	GNS	-0.802998
																	BABAM1	-0.803028
																	NEU1	-0.803653
																	BAD	-0.803983
																	NDUFAF3	-0.804443
																	FUS	-0.804947
																	CD200	-0.805833
																	DNAJC1	-0.806173
																	EIF3B	-0.806823
																	ZC3H14	-0.80788
																	ATP6V1D	-0.808115
																	POP4	-0.808155
																	GNL3L	-0.808326
																	TMEM87A	-0.808696
																	MRPL13	-0.809251
																	SAV1	-0.809499
																	POLI	-0.80967
																	ATP5H	-0.810452
																	MAPKAPK5	-0.812908
																	DHX30	-0.813712
																	MORF4L1	-0.815434
																	PNMA1	-0.81546
																	ANP32A	-0.818976
																	ITFG1	-0.820126
																	LOC728392	-0.820226
																	ICMT	-0.820724
																	PSEN2	-0.822812
																	ZNF22	-0.823217
																	ZNF106	-0.82416
																	NONO	-0.824357
																	DNM1L	-0.825073
																	ZBTB38	-0.826187
																	PRMT1	-0.826353
																	PPP1R10	-0.826505
																	EWSR1	-0.827669
																	RABEP1	-0.82825
																	ROCK1	-0.82912
																	PI4KB	-0.829617
																	SUMO1	-0.830177
																	TDP2	-0.831864
																	H2AFZ	-0.833417
																	RTCA	-0.834312
																	FBXW11	-0.834379
																	SQLE	-0.834523
																	CAP1	-0.835094
																	PSMA7	-0.835938
																	PRMT5	-0.836248
																	ATP6V1C1	-0.836426
																	CST3	-0.836524
																	TTC37	-0.837169
																	HIPK2	-0.837229
																	TAF15	-0.837735
																	CAPZB	-0.83886
																	RBM47	-0.840375
																	NBEA	-0.840492
																	CYB5R1	-0.841043
																	CLIC4	-0.841448
																	SPAG7	-0.84172
																	TRAM1	-0.842101
																	MAGOH	-0.842903
																	ARFIP1	-0.842939
																	COG5	-0.843044
																	MCFD2	-0.843303
																	CAPN7	-0.843789
																	CCNB1IP1	-0.844321
																	PHTF1	-0.844486
																	SDF4	-0.845763
																	BECN1	-0.846077
																	MOCS2	-0.846133
																	PDZD2	-0.846231
																	HDDC2	-0.846251
																	MTF2	-0.847249
																	PAFAH1B1	-0.847253
																	MYO1E	-0.847299
																	AK2	-0.847317
																	BAG2	-0.848704
																	SEPTIN10	-0.848992
																	STX2	-0.850396
																	P2RX4	-0.851252
																	VIM	-0.851611
																	UTP3	-0.853428
																	GPX7	-0.854394
																	LMBRD1	-0.856762
																	IK	-0.858259
																	MED1	-0.858488
																	AIP	-0.858798
																	PIR	-0.858812
																	MRPS15	-0.860785
																	SETD5	-0.86402
																	TRMT11	-0.865521
																	ID1	-0.86667
																	CRYZL1	-0.866713
																	PEX2	-0.866947
																	ATP1B1	-0.867357
																	CREM	-0.867364
																	ADAMTS5	-0.86842
																	PSMC2	-0.868722
																	TOMM20	-0.869523
																	ZDHHC4	-0.872093
																	TRIP12	-0.872854
																	RIOK3	-0.873594
																	COPE	-0.874272
																	RPF1	-0.874861
																	SEPW1	-0.875944
																	ODC1	-0.87633
																	RRAGC	-0.877463
																	NUP88	-0.87938
																	HEBP1	-0.879746
																	VEZF1	-0.87982
																	MRPL18	-0.881819
																	RANBP9	-0.882099
																	GLRX3	-0.882297
																	PVR	-0.882846
																	USP39	-0.882969
																	PRPF4	-0.883255
																	TMED10	-0.883352
																	MCUR1	-0.884132
																	NFATC2IP	-0.885462
																	DPY19L1	-0.885945
																	NOL3	-0.887635
																	GPR116	-0.888782
																	HNRNPK	-0.889174
																	ZNF281	-0.889358
																	ASPH	-0.891658
																	TRAK2	-0.891794
																	ARL6IP1	-0.892639
																	HES1	-0.894379
																	TCTN3	-0.894828
																	CRK	-0.894907
																	PSMA2	-0.896242
																	ATIC	-0.896336
																	INSIG2	-0.898006
																	SLK	-0.898243
																	EPM2AIP1	-0.899305
																	RYK	-0.90037
																	CNOT7	-0.901079
																	IGF2R	-0.901213
																	CPQ	-0.901441
																	MPHOSPH8	-0.903461
																	TASP1	-0.903838
																	UBE3A	-0.904119
																	ZNF23	-0.904191
																	GTF2H1	-0.904996
																	PRKAG1	-0.905487
																	PAK1	-0.905758
																	CNN3	-0.906525
																	NAA15	-0.907582
																	SRSF10	-0.90945
																	CSNK1A1	-0.909459
																	PSMD12	-0.912238
																	PDLIM2	-0.91295
																	NCOA3	-0.912997
																	HSPB1	-0.91315
																	RYBP	-0.913475
																	PPFIBP1	-0.914046
																	RABGAP1	-0.914651
																	TRIM33	-0.915274
																	UFD1L	-0.915644
																	LMO2	-0.916252
																	P4HTM	-0.91753
																	ATP6V1G1	-0.918594
																	CD47	-0.918612
																	BTN3A2	-0.919106
																	MYO1B	-0.919258
																	DNAJB4	-0.919355
																	MRPL16	-0.921007
																	ACTR3	-0.921283
																	SDHC	-0.921754
																	WARS	-0.922905
																	Y16709	-0.923119
																	RAP1GDS1	-0.924212
																	C1QBP	-0.925313
																	CTSO	-0.925493
																	CPD	-0.926351
																	ZNF302	-0.927652
																	IL10RB	-0.92775
																	UMPS	-0.928689
																	EIF3C	-0.928889
																	TSPAN5	-0.929782
																	PPP1R7	-0.931353
																	FAM45A	-0.93145
																	ERGIC3	-0.932617
																	SNRPB	-0.933026
																	TGOLN2	-0.933259
																	HMBOX1	-0.9335
																	LAPTM4B	-0.935836
																	SNTB2	-0.937307
																	ZMYND8	-0.938311
																	ASNS	-0.938532
																	SNRNP35	-0.938602
																	CBR1	-0.941098
																	SGCE	-0.942365
																	YY1	-0.942812
																	ARL5A	-0.945082
																	ACOT13	-0.945285
																	ACSL1	-0.945714
																	TUBB3	-0.946854
																	PMEPA1	-0.948403
																	DHX9	-0.94942
																	MTUS1	-0.951442
																	LRRC42	-0.951481
																	SERINC1	-0.952343
																	DNAJA1	-0.95245
																	LIMS1	-0.952992
																	PRKAR1A	-0.95319
																	SLC35D2	-0.953375
																	TDRD7	-0.953725
																	NDUFV2	-0.953993
																	GABRA2	-0.955311
																	RRAGA	-0.956255
																	SLC25A11	-0.959451
																	PTPN12	-0.959913
																	ABHD6	-0.960192
																	PSMA1	-0.963211
																	ENO1	-0.964407
																	TSN	-0.965225
																	UFSP2	-0.965251
																	NKTR	-0.965542
																	ACLY	-0.966416
																	HIRA	-0.96774
																	AASDHPPT	-0.972221
																	GRAMD3	-0.974938
																	GNA11	-0.975589
																	SNRPA1	-0.975771
																	PRKCSH	-0.977722
																	PSMD4	-0.978488
																	PHB	-0.979165
																	KLF6	-0.979444
																	MAPRE1	-0.982788
																	RAD17	-0.983098
																	SLC25A6	-0.983234
																	CUL1	-0.983585
																	TAGLN2	-0.986156
																	CCNI	-0.986358
																	SEC62	-0.986947
																	PLEKHB2	-0.987818
																	HLA-F	-0.987921
																	AKIRIN1	-0.988308
																	FOXN3	-0.988575
																	DDOST	-0.99013
																	ATXN7	-0.990228
																	PSMD11	-0.990585
																	BAG1	-0.991749
																	CD46	-0.992885
																	BANF1	-0.992952
																	DSTYK	-0.993238
																	CSGALNACT2	-0.994403
																	SAP18	-0.997276
																	APLP2	-0.997331
																	DNAJC7	-0.998568
																	BRD7	-0.999474
																	ABCF2	-0.999661
																	NMD3	-1.00061
																	DYNLRB1	-1.00136
																	DLD	-1.00211
																	ARMCX3	-1.00356
																	CCT2	-1.00541
																	SPTBN1	-1.00631
																	PRPF31	-1.00716
																	IMPAD1	-1.00898
																	STAT3	-1.00978
																	RPN2	-1.01055
																	PELO	-1.01058
																	MAP9	-1.01116
																	SOD1	-1.01613
																	CEP68	-1.01616
																	SEC23B	-1.01735
																	G3BP2	-1.02038
																	GPS2	-1.02135
																	PTPN11	-1.02402
																	PNN	-1.02466
																	PSMA4	-1.02755
																	CDC16	-1.02789
																	TWSG1	-1.029
																	CLTA	-1.02956
																	PSMB8	-1.03074
																	TSPAN31	-1.03125
																	SNX17	-1.0316
																	EPHA4	-1.0329
																	TRIP4	-1.03382
																	STAU1	-1.03585
																	HLA-J	-1.03668
																	GPR125	-1.03683
																	RTN4	-1.03722
																	NUDT3	-1.0374
																	SPCS2	-1.0377
																	NUDC	-1.03807
																	CAP2	-1.03827
																	MRPL34	-1.04061
																	HPCAL1	-1.04205
																	DNPH1	-1.04373
																	KHDRBS1	-1.0441
																	NELL1	-1.04529
																	EIF1AX	-1.04558
																	CTNNA1	-1.04616
																	CYTH2	-1.04725
																	MED13	-1.04825
																	SRPK2	-1.05232
																	PGD	-1.0537
																	DNAJC10	-1.05385
																	NPR3	-1.05497
																	ILF3	-1.05646
																	PCBD1	-1.05748
																	IGFBP2	-1.05789
																	ACO2	-1.05887
																	SERBP1	-1.06204
																	CAT	-1.064
																	ILF2	-1.06575
																	HADHA	-1.06908
																	QKI	-1.07331
																	RBM5	-1.07405
																	CPNE3	-1.07585
																	TXNRD1	-1.0765
																	YBX1	-1.07665
																	PBX1	-1.07763
																	ST3GAL1	-1.07804
																	IMP3	-1.08072
																	PAPPA	-1.08203
																	GNAI3	-1.08245
																	SWAP70	-1.08431
																	PDIA6	-1.08577
																	CD59	-1.08783
																	ECHDC1	-1.0879
																	ZNF330	-1.08889
																	NSFL1C	-1.09167
																	CAND1	-1.09284
																	PPAP2A	-1.093
																	INTS12	-1.09357
																	CANX	-1.09465
																	SLC5A3	-1.09563
																	EGFR	-1.09575
																	VDAC3	-1.09641
																	AP1S2	-1.09743
																	SH3GLB1	-1.09746
																	ARIH2	-1.10001
																	DENND1B	-1.1001
																	IGF1R	-1.10213
																	LSM4	-1.10407
																	P4HA2	-1.10459
																	BRD2	-1.10719
																	THOC2	-1.10788
																	ZNF207	-1.10792
																	GNB1	-1.1142
																	KLHL20	-1.11513
																	BTN3A3	-1.11549
																	PRPF4B	-1.11595
																	VAMP8	-1.11632
																	WIPI1	-1.11656
																	UBE2W	-1.11691
																	ASNA1	-1.11868
																	POGLUT1	-1.12024
																	HNRNPR	-1.12219
																	CDC27	-1.12234
																	TGFBR2	-1.12254
																	CMTM6	-1.12439
																	METAP2	-1.12544
																	DDX18	-1.12628
																	GRIK2	-1.13841
																	NCOA1	-1.13906
																	RABGGTB	-1.13962
																	SPTLC1	-1.14145
																	ATP6AP2	-1.14237
																	PTP4A2	-1.14474
																	DARS	-1.14476
																	WBP4	-1.14638
																	MSRB2	-1.1465
																	NFAT5	-1.14942
																	RBM8A	-1.1522
																	M6PR	-1.15635
																	AMZ2	-1.1569
																	ZNF451	-1.15704
																	PEA15	-1.16062
																	HNRNPC	-1.16341
																	RANBP2	-1.1643
																	HNRNPD	-1.16616
																	RRAGB	-1.16926
																	PDIA3	-1.17093
																	TRA2B	-1.17147
																	HSPH1	-1.17169
																	OAZ1	-1.17361
																	PQBP1	-1.17386
																	MYH10	-1.17432
																	FXR1	-1.17724
																	ANKRD11	-1.18248
																	COMT	-1.18382
																	RNF114	-1.1839
																	DCTD	-1.18589
																	MAGED2	-1.18599
																	MGAT4B	-1.18866
																	SDHB	-1.1889
																	GLUD2	-1.18934
																	UPF3A	-1.18984
																	IDH3G	-1.19125
																	DHRS7B	-1.19564
																	SNW1	-1.19887
																	TTF1	-1.19888
																	HSPE1-MOB4	-1.20763
																	IL6ST	-1.20902
																	WAC	-1.21389
																	POLR2E	-1.21419
																	BTG1	-1.21431
																	PGRMC1	-1.21479
																	IFI44L	-1.21533
																	RBM25	-1.2163
																	CYR61	-1.21669
																	SLC25A4	-1.21775
																	AATF	-1.21986
																	HLA-C	-1.22215
																	SNRPN	-1.22224
																	PSMB4	-1.22311
																	CNOT8	-1.22524
																	SNX4	-1.2305
																	PAWR	-1.23134
																	USP1	-1.23342
																	SUV420H1	-1.23354
																	OSBPL8	-1.2338
																	BBX	-1.23439
																	GMPR2	-1.23491
																	SSBP1	-1.23562
																	CYLD	-1.23767
																	SERTAD2	-1.23775
																	MBD4	-1.24133
																	NELFCD	-1.24233
																	NAA35	-1.24261
																	TPM2	-1.247
																	SERINC3	-1.24708
																	PTK2	-1.2498
																	SLC26A2	-1.25279
																	PCMT1	-1.25429
																	RNASEH1	-1.25494
																	TRIM2	-1.25533
																	DDX17	-1.25607
																	SSRP1	-1.25639
																	MAP1LC3B	-1.26191
																	ATG12	-1.26505
																	RIT1	-1.26736
																	NNT	-1.26766
																	TRIM44	-1.26808
																	PSMD1	-1.26822
																	SRP72	-1.27291
																	SEC11A	-1.27314
																	FNDC3B	-1.27416
																	ZNF24	-1.27437
																	DNAJB6	-1.2745
																	RNF146	-1.27804
																	IFNGR1	-1.27883
																	CHMP2A	-1.28314
																	TIMM23	-1.28794
																	COG7	-1.28807
																	RPA1	-1.29378
																	YWHAH	-1.2943
																	FNBP1	-1.29937
																	AKAP13	-1.30032
																	ELF1	-1.30118
																	PRRC2C	-1.30272
																	CYB5B	-1.30459
																	PLEKHA1	-1.3054
																	PTPRB	-1.30953
																	TCF25	-1.31145
																	TUSC3	-1.31425
																	UGCG	-1.31514
																	COLGALT2	-1.32138
																	CDC37	-1.32245
																	PLEKHO1	-1.32616
																	BLVRA	-1.33748
																	CEP350	-1.33851
																	GYG1	-1.33935
																	ARPC1A	-1.34302
																	PDCD6	-1.34478
																	GMDS	-1.35113
																	ERGIC2	-1.35218
																	PLOD2	-1.35503
																	BCLAF1	-1.3562
																	EPRS	-1.35798
																	RRAS	-1.36034
																	ATP1B3	-1.36194
																	AIFM1	-1.36207
																	KPNB1	-1.36576
																	BBS4	-1.3661
																	MACF1	-1.36768
																	PSMD13	-1.37138
																	EIF4G1	-1.3727
																	SSB	-1.37324
																	ARL6IP5	-1.37458
																	SRSF3	-1.38051
																	STX11	-1.38256
																	ZNF148	-1.38629
																	FHL1	-1.38851
																	PWP1	-1.39459
																	SDC2	-1.39506
																	MAGT1	-1.39526
																	ESF1	-1.39861
																	AQP3	-1.40139
																	HNRNPM	-1.40555
																	LRRFIP1	-1.40725
																	TRAM2	-1.40959
																	CTGF	-1.41124
																	USO1	-1.41396
																	FOXO3	-1.42257
																	SKAP2	-1.42338
																	SSBP2	-1.42414
																	HLA-G	-1.42573
																	TNPO3	-1.42751
																	AP3D1	-1.42787
																	COL4A3BP	-1.42959
																	DDX50	-1.43075
																	PROSC	-1.43578
																	HNRNPF	-1.43655
																	SMC3	-1.43777
																	COPS8	-1.43994
																	EIF5B	-1.44015
																	PHACTR2	-1.44878
																	ANKHD1	-1.45295
																	DHRS7	-1.45452
																	PUM1	-1.45507
																	VDAC1	-1.45726
																	TOP1	-1.45817
																	FBXW7	-1.45868
																	F5	-1.46028
																	STAG2	-1.46356
																	SPAG9	-1.46736
																	PARD3	-1.46826
																	DPP8	-1.47896
																	ASCC2	-1.48093
																	BMP2	-1.48308
																	COL4A4	-1.48364
																	LIMCH1	-1.48991
																	PDPK1	-1.49128
																	RAD21	-1.49308
																	EIF3A	-1.49466
																	SELT	-1.49904
																	CNPY2	-1.49947
																	AIDA	-1.49951
																	VAMP3	-1.50074
																	HIVEP2	-1.50895
																	MLEC	-1.50901
																	FNTA	-1.51018
																	RNF14	-1.51042
																	KRAS	-1.51448
																	PRPF40A	-1.51454
																	PAPOLA	-1.52082
																	CCZ1	-1.53502
																	TAOK3	-1.54687
																	SRRM2	-1.55597
																	MBNL2	-1.56594
																	TNPO1	-1.56648
																	ITGA8	-1.57341
																	WSB1	-1.5757
																	RAC1	-1.57577
																	MYOF	-1.57625
																	P4HB	-1.58951
																	FEZ2	-1.58986
																	YWHAB	-1.59018
																	PLXDC2	-1.59024
																	GDI2	-1.6037
																	RALBP1	-1.61432
																	CD99	-1.61542
																	PSD3	-1.62092
																	MBP	-1.62596
																	SNCA	-1.63778
																	DHX15	-1.63784
																	TIMP3	-1.64503
																	AHCYL1	-1.66543
																	TMCO3	-1.66763
																	ARF4	-1.66928
																	PKN2	-1.67521
																	HSP90AB1	-1.68291
																	SMAD1	-1.68444
																	SULF1	-1.68842
																	TMEM230	-1.69584
																	NPEPPS	-1.70172
																	GAPDH	-1.702
																	CHD4	-1.70873
																	TPR	-1.7097
																	MAP4	-1.71975
																	GDE1	-1.72289
																	DLC1	-1.72554
																	PSMA3	-1.7341
																	ZBTB20	-1.74388
																	CTDSPL	-1.7456
																	KIAA1033	-1.75292
																	GLG1	-1.75667
																	PURA	-1.75869
																	HLA-B	-1.76069
																	PSMC3	-1.77318
																	RAN	-1.77744
																	MTDH	-1.77935
																	NR3C1	-1.79125
																	ATRX	-1.80898
																	TTC3	-1.82889
																	ZC3H15	-1.82993
																	THUMPD1	-1.83805
																	MYO6	-1.844
																	YIPF6	-1.85135
																	PON2	-1.88536
																	BPTF	-1.91804
																	IQGAP1	-1.94438
																	KIF5B	-1.9919
																	SCAF11	-1.99871
																	RAB31	-2.00759
																	PPIG	-2.01487
																	SON	-2.02426
																	SEC63	-2.02903
																	RBFOX2	-2.04135
																	OAS1	-2.0431
																	CALD1	-2.125
																	SART3	-2.13034
																	TSPAN3	-2.16577
																	LUC7L3	-2.21627
																	DYNC1LI2	-2.25986
																	RBMS1	-2.27092
																	UBXN4	-2.2874
																	MYLK	-2.29527
																	ACSL3	-2.30858
																	PCYOX1	-2.33857
																	CDC42BPA	-2.59423
																	PPAP2B	-2.74878
																	MYLIP	-2.74963
																	TROVE2	-2.75633
[truncated: 2 more columns]

## Sheet: Suppl2
	Supplementary File 2: GO annotation for upregulated DEGs in glomeruli and tubulointerstitial compartments, and downregulated DEGs in tubulointerstitium
	GO annotation for upregulated DEGs in glomeruli										GO annotation for upregulated DEGs in tubulointerstitium										GO annotation for downregulated DEGs in tubulointerstitium
	GO Term	Term	Count	%	PValue	Genes	Benjamini	FDR			GO Term	Term	Count	%	PValue	Genes	Benjamini	FDR			GO Term	Term	Count	%	PValue	Genes	Benjamini	FDR
	Biological Process										Biological Process										Biological Process
	GO:0030198	extracellular matrix organization	39	8.76404	2.19532e-23	PXDN, ELF3, LUM, TNC, ELN, COL3A1, ITGB2, ITGB3, SOX9, ITGAM, CD44, HPSE, COMP, COL6A3, COL6A1, FBN2, COL8A1, COL11A1, COL8A2, FN1, COL13A1, OLFML2B, FBN1, NID2, ITGA4, COL16A1, COL5A2, COL5A1, VWF, LAMA4, FBLN1, COL14A1, BGN, LAMC3, ITGA7, COL1A2, VCAN, LAMC2, COL1A1	5.3456e-20	3.86116e-20			GO:0030198	extracellular matrix organization	26	9.18728	9.30611e-16	PXDN, ELF3, LUM, TNC, COL3A1, ITGB2, POSTN, ITGB3, SOX9, ITGAM, CD44, COL6A3, ITGB6, TGFBI, LOXL1, FN1, ICAM1, COL4A2, COL4A1, ICAM2, VWF, PECAM1, COL1A2, LAMC2, VCAN, COL1A1	1.4122e-12	1.4877e-12			GO:0055114	oxidation-reduction process	44	15.493	6.29179e-17	ALDH8A1, CYP3A4, ALDH1L1, SORD, GLUD2, HSD17B14, PYROXD1, GLUD1, PAH, KMO, ALDH3A2, PIPOX, PECR, FMO5, CRYL1, CYP27B1, P4HA2, AKR7A3, ALDH4A1, DAO, HPD, NQO2, NOX4, ALDH6A1, PCBD1, MAOA, BCKDHB, MAOB, QDPR, CYB5A, GRHPR, ACADL, CYP4A11, ALDH7A1, DHRS4, HSDL2, PRODH2, CYP4F3, PCYOX1, DIO1, AOC1, HPGD, CRYM, DCXR	1.84852e-13	1.88738e-13
	GO:0007155	cell adhesion	50	11.236	3.22687e-18	CCL2, TNC, CCR1, L1CAM, ITGB2, ITGB3, CDH3, ITGAM, CDH6, ISLR, CD44, COMP, FAP, COL6A3, CLEC4A, CD2, COL6A1, CD24, SPON2, LOXL2, COL8A1, ENTPD1, THBS2, SELPLG, SPON1, FN1, SVEP1, COL15A1, ITGA4, NID2, MCAM, COL16A1, COL5A1, JUP, VWF, LYVE1, LAMA4, CD36, STAB1, LAMC3, CD300A, NLGN4X, CX3CR1, ITGA7, VCAN, LAMC2, COL1A1, MFAP4, ADAM12, AOC3	3.92871e-15	5.67547e-15			GO:0006955	immune response	35	12.3675	6.46364e-15	CXCL1, HLA-DQB1, PXDN, CCL2, LST1, IL27RA, IGLV1-44, IFITM2, C3, IFITM3, CXCL8, CXCL6, CCL5, HLA-DMA, CCL21, IL4R, HLA-DPB1, FCGR3A, IGKC, LTB, LY75, CRIP1, GZMA, CCL19, CTSS, TRBC1, TRIM22, CD86, FCGR2B, IGHD, CCR2, SLPI, DEFA1, HLA-DPA1, IGLC1	5.11924e-12	1.07692e-11			GO:0008152	metabolic process	20	7.04225	2.82851e-11	GSTA1, ECI2, ACO1, EHHADH, ACSM2A, BCKDHB, EPHX2, NPL, GRHPR, ISOC2, UGT1A1, ACSF2, ACSM3, ASPA, ACSL1, GSTM4, DIP2C, HDHD3, PRNP, ACAA1	2.35473e-08	4.75897e-08
	GO:0006954	inflammatory response	45	10.1124	7.99232e-18	CXCL1, CCL2, ELF3, PTGS2, C3, LY86, CCR1, TLR1, CXCL8, CCL8, ITGB2, TLR5, BDKRB2, CXCL6, CCL5, TLR7, HRH1, TNFRSF1B, FOLR2, CCL21, SERPINA3, PYCARD, PTX3, BLNK, CSF1R, SYK, CIITA, PTGER2, C4A, LYN, LY96, PIK3CD, ACKR1, LYZ, CCL19, IFI16, TRIL, CCL18, GGT5, CYBB, CCR5, STAB1, CCR2, HDAC9, AOC3	6.4871e-15	1.4057e-14			GO:0007155	cell adhesion	36	12.7208	1.4271e-14	CCL2, CYP1B1, TNC, ITGB2, POSTN, ITGB3, CDH3, PRKX, ITGAM, CDH6, SRPX, CD44, COL6A3, ITGB6, TGFBI, CD2, SPON2, THBS2, SPON1, FN1, ICAM1, SELP, SELL, ICAM2, COL15A1, MCAM, TPBG, VWF, STAB1, NLGN4X, PECAM1, CX3CR1, LAMC2, VCAN, COL1A1, ENG	7.59059e-12	2.39586e-11			GO:0006641	triglyceride metabolic process	10	3.52113	3.08061e-09	LPL, G6PC, ACSL1, APOE, SLC37A4, SLC22A4, APOH, GK3P, GK, MTTP	1.70974e-06	5.18315e-06
	GO:0006955	immune response	41	9.21348	2.74754e-13	CXCL1, C7, PXDN, CCL2, IGLV1-44, C3, CCR1, TLR1, CXCL8, CCL8, CXCL6, CCL5, LIF, TNFRSF1B, CCL21, FCGR1A, FCGR1B, IGKC, CIITA, CRIP1, GZMA, NCF4, IL1RN, CCL19, CTSS, TRBC1, VAV1, CCL18, IGSF6, LILRB2, CD86, TNFSF10, CD36, FCGR2B, CCR5, CCR2, IRF8, SLPI, HLA-DPA1, IGLC1, LCP2	1.67272e-10	4.83291e-10			GO:0006954	inflammatory response	32	11.3074	7.85034e-14	CXCL1, CCL2, S100A8, ELF3, C3, LY86, S100A9, CXCL8, TAC1, ITGB2, CXCL6, CCL5, HRH1, FOLR2, CCL21, ITGB6, SERPINA3, PYCARD, LY75, SELP, PTGER1, LYN, LY96, ANXA1, LYZ, ACKR1, CCL19, IFI16, CYBB, STAB1, CCR2, CLEC7A	3.12008e-11	1.31339e-10			GO:0006631	fatty acid metabolic process	9	3.16901	1.64294e-06	CYP4A11, CRYL1, ACADSB, EHHADH, ACSM2A, ANGPTL3, HADH, ACSF2, GHR	0.000683639	0.00276421
	GO:0030574	collagen catabolic process	16	3.59551	3.2204e-11	COL13A1, COL3A1, COL15A1, MMP7, CTSS, COL5A2, MMP2, COL5A1, COL6A3, COL1A2, COL6A1, COL1A1, ADAMTS3, COL8A1, COL8A2, COL11A1	1.56834e-08	5.6641e-08			GO:0045087	innate immune response	32	11.3074	2.25345e-12	S100A8, LY86, CLU, S100A9, TAC1, APOBEC3G, C1S, IGHM, CLEC10A, PYCARD, FCER1G, IGKC, SPON2, IGLL5, TYROBP, NCF2, LYN, LY96, ANXA1, SERPING1, IFI16, LCN2, C1QB, CORO1A, CYBB, IGHD, LCK, C1RL, SLPI, DEFA1, CLEC7A, IGLC1	7.16587e-10	3.77053e-09			GO:0006520	cellular amino acid metabolic process	8	2.8169	3.04476e-06	DDC, PEPD, GLUD2, GLUD1, QDPR, ABHD14A-ACY1, BPHL, SLC7A7	0.00101339	0.00512271
	GO:0030199	collagen fibril organization	13	2.92135	9.48446e-11	FMOD, TNXA, LUM, COL3A1, COL5A2, COL5A1, TGFB2, COL14A1, COL1A2, COL1A1, LOXL2, ADAMTS3, COL11A1	3.84911e-08	1.66814e-07			GO:0050776	regulation of immune response	20	7.06714	6.86304e-11	KLRB1, ICAM1, CD3D, IFITM1, IGLV1-44, SELL, C3, ICAM2, COL3A1, CD247, CD1C, ITGB2, TRBC1, FCGR2B, COL1A2, COL1A1, FCGR3A, IGKC, IGLC1, TYROBP	1.81871e-08	1.14836e-07			GO:0006805	xenobiotic metabolic process	10	3.52113	4.35237e-06	CYP3A4, GLYAT, CES2, CYP3A7, FMO1, EPHX2, AKR7A3, BPHL, AOC1, DPEP1	0.00120706	0.00732263
	GO:0002576	platelet degranulation	18	4.04494	5.67576e-10	PLEK, LYN, F13A1, CLU, ACTN1, HGF, ITGB3, TGFB2, ISLR, VWF, VEGFC, CD36, SERPINA3, TUBA4A, ITIH3, CFD, QSOX1, FN1	1.97435e-07	9.98262e-07			GO:0050900	leukocyte migration	17	6.00707	1.02879e-10	ICAM1, SELP, LYN, SELL, ITGB2, ITGB3, ITGAM, CD48, THBD, CD44, PECAM1, LCK, CD2, COL1A2, FCER1G, COL1A1, FN1	2.33681e-08	1.72141e-07			GO:0006635	fatty acid beta-oxidation	8	2.8169	5.92411e-06	ACOX2, ECI2, EHHADH, HIBCH, ACADL, HADH, SLC27A2, ACAA1	0.0014081	0.00996688
	GO:0050900	leukocyte migration	19	4.26966	1.16517e-09	CAV1, LYN, ITGB2, L1CAM, ITGA4, ITGB3, ITGAM, SLC7A11, CD48, THBD, CD44, LCK, COL1A2, CD2, FCER1G, COL1A1, INPP5D, SELPLG, FN1	3.54649e-07	2.04932e-06			GO:0002576	platelet degranulation	15	5.30035	9.6097e-10	SELP, A2M, PLEK, LYN, CLU, ACTN1, SERPING1, ITGB3, HGF, TIMP1, VWF, PECAM1, SERPINA3, CFD, FN1	1.90993e-07	1.60794e-06			GO:0042632	cholesterol homeostasis	9	3.16901	8.18059e-06	ACSM3, LPL, G6PC, APOE, SLC37A4, EPHX2, ANGPTL3, APOM, MTTP	0.00170114	0.013763
	GO:0030168	platelet activation	18	4.04494	3.28457e-09	RAP2B, GNA15, LYN, COL3A1, ACTN1, ITGB3, ITPR3, VAV1, PRKCB, VWF, RAC2, LCK, ADRA2A, COL1A2, FCER1G, COL1A1, SYK, LCP2	8.88659e-07	5.77697e-06			GO:0031295	T cell costimulation	11	3.88693	4.39341e-07	HLA-DQB1, CD86, CD3D, LYN, CCL21, CD247, LCK, CCL19, HLA-DPA1, HLA-DPB1, TRBC1	6.98528e-05	0.000735123			GO:0009083	branched-chain amino acid catabolic process	6	2.11268	1.00128e-05	ALDH6A1, ACADSB, MCCC1, BCKDHB, ACAD8, HIBCH	0.00185067	0.0168453
	GO:0070098	chemokine-mediated signaling pathway	14	3.14607	1.68445e-08	CXCL1, CCL2, CCR1, ACKR1, CXCL8, CCL19, CCL8, CXCL6, CCL5, CCL18, CCR5, CCL21, CCR2, CX3CR1	4.10162e-06	2.96264e-05			GO:0006958	complement activation, classical pathway	12	4.24028	5.08023e-07	C1QB, IGLV1-44, C3, IGHD, CLU, C1RL, SERPING1, C1S, IGKC, IGHM, IGLL5, IGLC1	7.34297e-05	0.000850044			GO:0006559	L-phenylalanine catabolic process	5	1.76056	1.97377e-05	PCBD1, QDPR, PAH, HPD, FAH	0.00328097	0.0332037
	GO:0050776	regulation of immune response	20	4.49438	9.19933e-08	LAIR1, CD3D, IFITM1, IGLV1-44, C3, COL3A1, CD247, ITGB2, ITGA4, TRBC1, LILRB2, SH2D1A, FCGR2B, CD300A, FCGR1A, COL1A2, COL1A1, IGKC, IGLC1, TYROBP	2.03638e-05	0.000161799			GO:0006508	proteolysis	25	8.83392	1.69604e-06	CAPN6, CTSZ, IGLV1-44, C3, ADAMTSL3, MMP7, HGF, CTSS, C1S, TMPRSS4, C1QB, GZMK, FCN1, C1RL, LTF, CPA3, ADAMTS1, PAPPA2, IGKC, TPSB2, TPSAB1, CASP1, CFD, IGLC1, WFDC2	0.000207418	0.00283786			GO:0055088	lipid homeostasis	7	2.46479	3.41563e-05	ACOX2, GCDH, ACADSB, ACAD8, ANGPTL3, ACADL, PNPLA3	0.00515677	0.0574526
	GO:0007229	integrin-mediated signaling pathway	15	3.37079	1.43299e-07	PLEK, COL3A1, ITGB2, ITGA4, ITGB3, COL16A1, VAV1, ITGAM, FBLN1, ITGA7, FCER1G, ADAMTS3, ADAM12, TYROBP, SYK	2.90773e-05	0.000252036			GO:0070098	chemokine-mediated signaling pathway	10	3.53357	1.844e-06	CXCL1, CCL2, CCL21, CCR2, CX3CR1, ACKR1, CXCL8, CCL19, CXCL6, CCL5	0.000209404	0.00308542			GO:0051289	protein homotetramerization	8	2.8169	4.79582e-05	CTH, PCBD1, GLS, FBP1, ACOT13, DPYS, ACADL, DCXR	0.0056875	0.0806593
	GO:0032760	positive regulation of tumor necrosis factor production	11	2.47191	1.74494e-07	CD36, CCL2, LY96, RASGRP1, CLU, CD2, PYCARD, FCER1G, CCL19, SPON2, SASH3	3.26835e-05	0.000306902			GO:0071347	cellular response to interleukin-1	10	3.53357	1.844e-06	LCN2, ICAM1, CCL2, CCL21, PYCARD, CXCL8, CCL19, CCL5, SOX9, MYC	0.000209404	0.00308542			GO:0008652	cellular amino acid biosynthetic process	6	2.11268	5.16561e-05	FOLH1, ASPA, FOLH1B, GLS, GLUD1, PAH	0.00571757	0.0868761
	GO:0006968	cellular defense response	12	2.69663	3.01296e-07	PRF1, LILRB2, SH2D1A, CCR5, NCF2, NCF1, LY96, CCR2, CX3CR1, MNDA, CLEC5A, TYROBP	4.89092e-05	0.000529924			GO:0050853	B cell receptor signaling pathway	9	3.18021	2.09031e-06	PTPRC, LYN, IGHD, LCK, MNDA, IGKC, IGHM, IGLL5, IGLC1	0.000221549	0.00349755			GO:0006094	gluconeogenesis	7	2.46479	6.9093e-05	SLC25A11, GPD1, G6PC, ALDOB, FBP1, PCK2, PC	0.00716445	0.116186
	GO:0006935	chemotaxis	16	3.59551	3.3652e-07	CXCL1, CCL2, CCR1, CXCL8, CCL8, L1CAM, CXCL6, CCL5, CCL18, PLAUR, DOCK2, RAC2, CCR5, CCR2, CX3CR1, PLAU	5.12128e-05	0.000591876			GO:0030168	platelet activation	12	4.24028	2.28985e-06	VWF, RAC2, LYN, COL3A1, LCK, COL1A2, PRKCH, FCER1G, ACTN1, COL1A1, ITGB3, ITPR3	0.000227529	0.00383142			GO:0006537	glutamate biosynthetic process	4	1.40845	7.93286e-05	GLUD2, GLS, GLUD1, ALDH4A1	0.00773973	0.133387
	GO:0045087	innate immune response	31	6.96629	3.43707e-07	LY86, TLR1, CLU, TLR5, TLR7, SH2D1A, PYCARD, CLEC4A, FCER1G, IGKC, PTX3, SPON2, TYROBP, CSF1R, SYK, C4A, NCF2, LYN, NCF1, LY96, PIK3CD, IFI16, TRIL, C1QA, C1QB, CYBB, CD209, LCK, SLPI, CLEC5A, IGLC1	4.92297e-05	0.000604516			GO:0032496	cellular response to fibroblast growth factor stimulus	7	2.4735	6.72553e-06	CCL2, CD44, CXCL8, POSTN, COL1A1, CCL5, MYC	0.000593914	0.0112529			GO:0033539	fatty acid beta-oxidation using acyl-CoA dehydrogenase	5	1.76056	0.000167462	ACOX2, GCDH, ACADSB, ACAD8, ACADL	0.0153721	0.281383
	GO:0031295	T cell costimulation	13	2.92135	4.40984e-07	CAV1, CD3D, LYN, CD247, CCL19, TRBC1, VAV1, CD86, CCL21, LCK, HLA-DPA1, CD24, CD28	5.96535e-05	0.000775607			GO:0050870	positive regulation of T cell activation	6	2.12014	7.21034e-06	CCL2, CCR2, LCK, PYCARD, HLA-DPA1, HLA-DPB1	0.000603212	0.012064			GO:0042157	lipoprotein metabolic process	6	2.11268	0.000336746	LPL, CUBN, LPA, APOE, ALB, APOM	0.0290833	0.56507
	GO:0030593	neutrophil chemotaxis	12	2.69663	5.82652e-07	CCL2, PIK3CD, CKLF, CCL8, CXCL8, FCER1G, ITGB2, CCL5, VAV1, CCL18, TGFB2, SYK	7.46687e-05	0.00102477			GO:0030574	collagen catabolic process	9	3.18021	7.74817e-06	COL4A2, COL4A1, COL3A1, COL6A3, COL1A2, COL15A1, MMP7, COL1A1, CTSS	0.000615792	0.0129638			GO:0048754	branching morphogenesis of an epithelial tube	5	1.76056	0.000454888	CLIC4, VEGFA, EGF, SLIT2, MYCN	0.0371696	0.762603
	GO:0071222	cellular response to lipopolysaccharide	15	3.37079	7.55396e-07	MRC1, CCL2, CXCL8, TLR5, EDNRB, LILRB2, CD86, TNFRSF1B, CD36, CCR5, IRF8, CX3CR1, TFPI, PYCARD, SPON2	9.19653e-05	0.0013286			GO:0060326	cell chemotaxis	9	3.18021	8.71488e-06	CXCL1, NOV, CCL2, CCL21, CCL19, CXCL6, HGF, CCL5, ENG	0.000659626	0.0145811			GO:0008202	steroid metabolic process	6	2.11268	0.000604913	CYP3A4, G6PC, DHRS4, CYP3A7, SLC37A4, UGT1A1	0.0468428	1.01291
	GO:0007165	signal transduction	56	12.5843	2.42153e-06	TLR1, IGFBP6, CD53, CD48, EDNRA, ARHGAP6, EVI2A, PPP1R1A, MICAL1, RAP2B, RET, LYN, SPARCL1, PIK3CD, TLE3, ARHGAP26, PLAUR, PRKCB, JUP, VEGFC, LILRB2, THBD, EEF1D, CLEC5A, CXCL1, CCL2, C3, CYTL1, CCL8, CXCL8, CXCL6, SOX9, RAC2, FCGR1A, RASGRP1, PDE1A, ADRA2A, PYCARD, INPP5D, NMU, HPGDS, TYROBP, GABRP, CSF1R, MRC1, HPCAL4, COL15A1, CCL18, TENM4, P2RX5, LYVE1, TNFSF10, EPS8, FCGR2B, CD300A, PLAU	0.000280743	0.00425895			GO:0032760	positive regulation of tumor necrosis factor production	8	2.82686	8.8896e-06	CCL2, LY96, CLU, CD2, PYCARD, FCER1G, CCL19, SPON2	0.000642272	0.0148734			Cellular Component
	GO:0060326	cell chemotaxis	11	2.47191	4.05753e-06	CXCL1, CCL2, CCL21, PDGFRA, CCL8, CCL19, LEF1, CXCL6, LPAR1, HGF, CCL5	0.000448995	0.00713621			GO:0006956	complement activation	10	3.53357	1.01695e-05	C1QB, IGLV1-44, C3, CLU, FCN1, CFH, C1S, CFD, IGKC, IGLC1	0.000702777	0.0170147			GO:0070062	extracellular exosome	140	49.2958	1.24659e-42	ALDH8A1, ALAD, ALDH1L1, GNA11, IQGAP2, BPHL, SLC22A11, SELENBP1, PNP, FAH, AZGP1, DAB2, ASPA, SLC2A5, PVALB, APOE, RAB29, APOH, AKR7A3, SLC4A4, APOM, NQO2, ALDH6A1, GATM, CRYAA, PCBD1, BST1, FBP1, QDPR, THY1, PCOLCE2, BHMT, MGAM, ABAT, SH3GL2, ACADSB, FOLH1B, ASS1, ALDOB, PTH1R, MME, KMO, PAH, GIPC2, AGMAT, FUZ, ALB, ENTPD5, IDH1, EGF, LPL, GPD1, BHMT2, CUBN, UPB1, SLC6A13, MAOB, GGH, EPHX2, AK2,…	2.70511e-40	1.58333e-39
	GO:0043065	positive regulation of apoptotic process	23	5.16854	5.88249e-06	BID, PTGS2, GZMA, CLU, SOX4, LPAR1, STK17A, ECT2, VAV1, NTRK3, TNFSF10, CDKN2A, SFRP1, ALDH1A3, SFRP4, RASSF2, MLLT11, MNDA, TGM2, PYCARD, PTN, INPP5D, IGFBP3	0.000622585	0.0103457			GO:0051607	positive regulation of angiogenesis	11	3.88693	1.5514e-05	CYBB, CYP1B1, C3, CX3CR1, CXCL8, RRAS, ITGB2, HGF, RUNX1, ENG, ANXA3	0.000986213	0.0259556			GO:0005739	mitochondrion	73	25.7042	3.28277e-22	ACOX2, GRPEL1, KYNU, ALDH1L1, EHHADH, BNIP3, BPHL, PECR, ACOT7, RAB29, MCCC1, SLC22A4, ACOT13, ACAD8, HADH, DHTKD1, RMND1, GHR, ALDH6A1, GATM, ACO1, ACSM2A, QDPR, ACADL, ASB9, ALDH7A1, DHRS4, ALDH1B1, CLIC4, SLC25A36, HAO2, ABAT, G0S2, PRNP, SLC27A2, ACADSB, GLUD2, ABHD6, GLUD1, ADH5, SFXN1, AGMAT, CYP27B1, ACSL1, ARG2, IDH1, ALDH4A1, SUGCT, NOX4, GCDH, ECI2, GPD1, MAOA, BCKDHB, MAOB, MACROD1, AK…	3.56181e-20	4.16953e-19
	GO:0050853	B cell receptor signaling pathway	10	2.24719	6.26331e-06	PTPRC, LAT2, LYN, PIK3CD, LCK, MNDA, IGKC, IGLC1, PRKCB, SYK	0.000635265	0.0110155			GO:0022617	extracellular matrix disassembly	9	3.18021	2.79874e-05	A2M, CD44, MMP7, LAMC2, CTSS, TPSAB1, ENG, FN1, TIMP1	0.00171009	0.0468194			GO:0005759	mitochondrial matrix	29	10.2113	1.31639e-13	ACADSB, GRPEL1, GLUD1, BPHL, AGXT, ACSF2, MCCC1, ARG2, ALDH4A1, ACAD8, HADH, DHTKD1, GCDH, ALDH6A1, ACSM2A, BCKDHB, AK4, ACADL, PCK2, HAGH, ACSM3, TST, GLYAT, ALDH7A1, ALDH1B1, GLS, ABAT, HIBCH, PC	9.52427e-12	1.67244e-10
	GO:0071347	cellular response to interleukin-1	11	2.47191	9.17224e-06	CCL2, SFRP1, CCL21, PYCARD, TFPI, CCL8, CXCL8, CCL19, CCL5, SOX9, CCL18	0.000892982	0.0161311			GO:0071356	cellular response to tumor necrosis factor	10	3.53357	6.69388e-05	LCN2, ICAM1, CCL2, CCL21, PYCARD, CXCL8, CCL19, POSTN, COL1A1, CCL5	0.00393432	0.111946			GO:0005782	peroxisomal matrix	13	4.57746	2.82285e-12	ACOX2, ECI2, EHHADH, HAO2, IDH1, FABP1, DAO, GRHPR, AGXT, PHYH, PIPOX, CRYM, ACAA1	1.5314e-10	3.58538e-09
	GO:0006956	complement activation	12	2.69663	9.54335e-06	C1QA, C7, C1QB, C4A, IGLV1-44, C3, CFB, CLU, CFH, CFD, IGKC, IGLC1	0.000893376	0.0167837			GO:0006910	phagocytosis, recognition	6	2.12014	7.25782e-05	IGHD, CLEC7A, IGKC, IGHM, IGLL5, IGLC1	0.00411307	0.121372			GO:0016324	apical plasma membrane	24	8.4507	1.11021e-10	NOX4, PLD1, CUBN, KL, SLC12A3, ERBB3, MPDZ, PTH1R, SLC34A1, SLC7A9, SLC22A11, SLC10A2, THY1, CYP4A11, SLC2A5, ANK2, SLC2A2, MGAM, SLC22A4, PDZK1, DPEP1, DPP4, ABCC6, SLC5A12	4.8183e-09	1.4101e-07
	GO:0006957	complement activation, alternative pathway	6	1.34831	9.83462e-06	C7, C3, CFB, CFH, CFD, VSIG4	0.000886549	0.0172959			GO:0006909	phagocytosis	7	2.4735	0.000109283	CORO1A, CD93, PECAM1, ANXA1, ITGB2, CD302, ANXA3	0.00597412	0.1827			GO:0005777	peroxisome	15	5.28169	5.65741e-10	ACOX2, EHHADH, EPHX2, PHYH, AGXT, PIPOX, ALDH3A2, PECR, DHRS4, HSDL2, HAO2, IDH1, DAO, AOC1, ACAA1	2.0461e-08	7.18562e-07
	GO:0001525	angiogenesis	19	4.26966	1.14029e-05	CAV1, CCL2, PTGS2, COL15A1, CSPG4, CXCL8, JAG1, MCAM, MMP2, VASH1, TGFB2, EPHB2, VEGFC, FAP, PLXDC1, COL8A1, COL8A2, FN1, SYK	0.000991156	0.0200537			GO:0071300	cellular response to retinoic acid	8	2.82686	0.000124012	MUC1, TESC, CCL2, LYN, TNC, COL1A1, SOX9, MYC	0.00634081	0.2073			GO:0005829	cytosol	83	29.2254	1.83466e-06	ALDH8A1, ALAD, KYNU, ALDH1L1, EHHADH, IQGAP2, SELENBP1, PNP, FAH, CRYL1, ACOT7, PGPEP1, ASPA, GSTM4, ANK2, RAB29, MAPT, MCCC1, PCBP2, RGN, AKR7A3, ACOT13, DAO, FGF1, DHTKD1, HPD, NET1, DDC, PCBD1, ACO1, FBP1, QDPR, GRHPR, THY1, HAGH, ALDH7A1, CTH, RAB11FIP3, CLIC4, BHMT, RGCC, ADD3, SH3GL2, SORD, GCLC, ASS1, HSD17B14, ALDOB, ADH5, DPYS, ADH6, PAH, KMO, GCH1, GALK1, PLIN2, LANCL2, DNMT3L, IDH1, SU…	5.68727e-05	0.00233022
	GO:0030335	positive regulation of cell migration	17	3.82022	1.38424e-05	RET, LYN, CCR1, PIK3CD, LEF1, HGF, MCAM, CCL5, NTRK3, ADRA2A, CEMIP, SEMA4C, PDGFRA, LAMC2, COL1A1, PLAU, CSF1R	0.00116161	0.0243434			GO:0010951	negative regulation of endopeptidase activity	10	3.53357	0.00013988	A2M, C3, COL6A3, SERPINA3, SLPI, SERPING1, CSTA, TFPI2, WFDC2, TIMP1	0.00692667	0.233796			GO:0005741	mitochondrial outer membrane	13	4.57746	2.88626e-06	ASS1, MAOA, MAOB, BNIP3, BPHL, KMO, CYB5A, ACSL1, CYP27B1, DAO, GK3P, GK, PRNP	7.82869e-05	0.00366585
	GO:0007166	cell surface receptor signaling pathway	21	4.7191	1.6624e-05	PTPRC, CCL2, IFITM1, CD3D, LY96, CCR1, CD247, CD53, BDKRB2, IGSF6, INHBA, LILRB2, EDNRB, ADRB2, TNFSF10, CD36, CCR5, TACSTD2, CLEC4A, CD2, CD28	0.00134842	0.0292346			GO:0006935	chemotaxis	10	3.53357	0.000148949	CXCL1, PLP2, CCL2, RAC2, CCR2, CX3CR1, CXCL8, DEFA1, CXCL6, CCL5	0.00715147	0.248936			GO:0034361	very-low-density lipoprotein particle	5	1.76056	0.000205979	LPL, APOE, APOH, PCYOX1, APOM	0.00495457	0.261304
	GO:0022617	extracellular matrix disassembly	11	2.47191	1.6989e-05	CD44, ELN, FBN1, MMP7, LAMC2, CTSS, FBN2, TLL2, TPSAB1, MMP2, FN1	0.00133358	0.0298764			GO:0007229	integrin-mediated signaling pathway	9	3.18021	0.000185377	PLEK, COL3A1, ITGB6, FCER1G, ADAMTS1, ITGB2, ITGB3, ITGAM, TYROBP	0.00863244	0.30973			GO:0031526	brush border membrane	6	2.11268	0.00102165	CUBN, PTH1R, SLC34A1, SLC7A9, PDZK1, MTTP	0.0219369	1.28989
	GO:0007204	positive regulation of cytosolic calcium ion concentration	14	3.14607	2.80583e-05	EDNRA, EDNRB, PTGER2, GNA15, CD36, CCR5, CCR1, CCR2, PDGFRA, CD52, LPAR1, BDKRB2, CD24, ITPR3	0.00206825	0.049338			GO:0007165	signal transduction	36	12.7208	0.00021236	CXCL1, CCL2, CLDN4, C3, IGFBP6, S100A9, CXCL8, CD53, CXCL6, SFN, ELK3, SOX9, CD48, RAC2, EVI2A, CD69, IL4R, PYCARD, CSF2RB, RUNX1, CASP1, LTB, TYROBP, MRC1, LY75, LYN, ANXA1, S100A11, COL15A1, PRKCH, TNFRSF17, TLE1, THBD, FCGR2B, PECAM1, VOPP1	0.00960183	0.354737			GO:0005778	peroxisomal membrane	6	2.11268	0.0013257	PECR, ACSL1, DHRS4, DAO, SLC27A2, ALDH3A2	0.0258303	1.67081
	GO:0002407	dendritic cell chemotaxis	6	1.34831	4.3571e-05	CCR5, CCL21, CCR1, CCR2, CCL19, CCL5	0.00302678	0.0766058			GO:0006911	phagocytosis, engulfment	6	2.12014	0.000218845	IGHD, FCER1G, IGKC, IGHM, IGLL5, IGLC1	0.00962015	0.365552			GO:0031093	platelet alpha granule lumen	6	2.11268	0.00144049	KNG1, ALB, VEGFA, HRG, EGF, PLG	0.0257308	1.81426
	GO:0006508	proteolysis	29	6.51685	5.18885e-05	IGLV1-44, ADAMTSL3, C3, MMP7, MMP2, PCOLCE, FAP, LTF, CPA3, IGKC, CFD, TPSB2, C4A, CFB, CTSS, HGF, TMPRSS4, C1QA, C1QB, GGT5, GZMK, SFRP1, PAPPA2, TLL2, ADAM12, TPSAB1, IGLC1, WFDC2, PLAU	0.00350362	0.0912233			GO:0001525	angiogenesis	13	4.59364	0.000253727	NOV, COL4A2, CCL2, CYP1B1, PECAM1, TGFBI, COL15A1, CXCL8, ELK3, MCAM, TNFAIP2, PRKX, FN1	0.0108456	0.423702			Molecular Function
	GO:0007596	blood coagulation	16	3.59551	5.42744e-05	GGCX, LYN, F13A1, ITGB3, PLAUR, P2RX5, VWF, THBD, CD36, SERPINE2, TFPI, COL1A2, FCER1G, COL1A1, ENTPD1, PLAU	0.00356557	0.0954158			GO:0071346	cellular response to interferon-gamma	7	2.4735	0.00028667	MRC1, CCL2, CCL21, CCL19, HLA-DPA1, CCL5, MYC	0.0119249	0.478588			GO:0003824	catalytic activity	21	7.39437	2.88808e-11	ECI2, ALAD, PLD1, ALDH1L1, EHHADH, ACSM2A, BCKDHB, EPHX2, ISOC2, PNP, CAPN3, ACSF2, PBLD, ACSM3, ACSL1, DIP2C, LANCL2, MGAM, OGG1, SUGCT, HPGD	1.87147e-08	4.31039e-08
	GO:0071346	cellular response to interferon-gamma	9	2.02247	7.44565e-05	CIITA, MRC1, CCL2, CCL21, CCL8, CCL19, HLA-DPA1, CCL5, CCL18	0.0047599	0.130875			GO:0090023	positive regulation of neutrophil chemotaxis	5	1.76678	0.000369981	CXCL1, RAC2, CCL21, CXCL8, CCL19	0.0149734	0.61727			GO:0016491	oxidoreductase activity	20	7.04225	6.44206e-10	NOX4, CYP3A4, SORD, ALDH1L1, HSD17B14, MAOA, PYROXD1, MAOB, ADH5, ADH6, PIPOX, ALDH3A2, ALDH7A1, ALDH1B1, HSDL2, HAO2, ALDH4A1, HPGD, DCXR, NQO2	2.08723e-07	9.61462e-07
	GO:0050729	positive regulation of inflammatory response	10	2.24719	7.55933e-05	CCL2, MAPK13, CCR2, PLA2G7, TGM2, CCL8, IL33, CCL5, TLR7, CCL18	0.00470879	0.132872			GO:0042102	positive regulation of T cell proliferation	7	2.4735	0.000380034	PTPRC, CORO1A, ANXA1, CCL19, HLA-DPA1, HLA-DPB1, CCL5	0.0149956	0.633993			GO:0042803	protein homodimerization activity	36	12.6761	8.6187e-09	GRPEL1, KYNU, ERBB3, ADH5, BNIP3, AGXT, GCH1, CRYL1, ACOT7, GSTM4, PVALB, APOE, IDH1, SLC22A6, DPP4, GHR, GPD1, CUBN, MSH3, MAOB, QDPR, SLC34A1, EPHX2, NPR3, GRHPR, UGT1A1, SLIT2, RAB11FIP3, PRLR, DNPH1, VEGFA, ABAT, QPRT, AOC1, HPGD, CRYM	1.86164e-06	1.28632e-05
	GO:0030217	T cell differentiation	7	1.57303	7.88801e-05	PTPRC, CD3D, GPR18, PIK3CD, LCK, SOX4, VAV1	0.0047905	0.138645			GO:0016525	negative regulation of angiogenesis	7	2.4735	0.000454419	COL4A2, CCL2, STAB1, CCR2, TNMD, CX3CR1, THBS2	0.0170597	0.757642			GO:0009055	electron carrier activity	13	4.57746	2.24568e-08	NOX4, ACOX2, GCDH, ACADSB, P4HA2, MAOB, ADH5, QDPR, ALDH4A1, AKR7A3, ACAD8, ACADL, NQO2	3.63799e-06	3.35162e-05
	GO:0001666	response to hypoxia	15	3.37079	9.72724e-05	MUC1, CAV1, CCL2, MMP2, ADA, SOD3, PRKCB, TGFB2, SOD2, EDNRA, VEGFC, UCP2, CD24, LOXL2, PLAU	0.00576066	0.170947			GO:0071222	cellular response to lipopolysaccharide	9	3.18021	0.000457582	MRC1, LCN2, ICAM1, CD86, CCL2, CX3CR1, PYCARD, CXCL8, SPON2	0.0167814	0.762897			GO:0004029	aldehyde dehydrogenase (NAD) activity	7	2.46479	1.80458e-07	ALDH8A1, ALDH6A1, ALDH7A1, ALDH1L1, ALDH1B1, ALDH4A1, ALDH3A2	2.3387e-05	0.000269328
	GO:0032755	positive regulation of interleukin-6 production	8	1.79775	0.000107942	LILRB2, CD36, MAPK13, PYCARD, FCER1G, IL33, SPON2, TLR7	0.00623886	0.189681			GO:0007166	cell surface receptor signaling pathway	14	4.947	0.000478273	KLRB1, PTPRC, CCL2, IL27RA, CD3D, IFITM1, LY96, CD247, ANXA1, TSPAN8, NPY1R, CD53, TACSTD2, CD2	0.0171386	0.797264			GO:0000062	fatty-acyl-CoA binding	8	2.8169	3.96716e-07	ACOX2, GCDH, ECI2, ALDH6A1, ACOT7, ACADSB, ACAD8, ACADL	4.28444e-05	0.000592087
	GO:0007169	transmembrane receptor protein tyrosine kinase signaling pathway	11	2.47191	0.00012952	NTRK3, RET, LYN, DOK5, LCK, CSPG4, BDKRB2, CSF1R, BLNK, SYK, LCP2	0.00730809	0.227558			GO:0008284	positive regulation of cell proliferation	19	6.71378	0.000520516	LYN, MARCKSL1, CRIP2, HCLS1, TNC, HGF, SOX9, S100A13, TIMP1, PLAC8, CD86, REG1A, RAC2, FOLR2, TIAM1, CCND2, LAMC2, MYC, FN1	0.0178355	0.867394			GO:0050660	flavin adenine dinucleotide binding	10	3.52113	8.39516e-07	NOX4, ACOX2, GCDH, FMO5, ACADSB, FMO1, MAOB, KMO, ACAD8, ACADL	7.77122e-05	0.00125295
	GO:0008285	negative regulation of cell proliferation	24	5.39326	0.00014265	CXCL1, RARRES1, IFITM1, LYN, PTGS2, IGFBP6, CXCL8, SOX4, SOD2, TGFB2, LIF, INHBA, VEGFC, CDKN2A, SERPINE2, SFRP1, CDKN2C, SFRP4, PMP22, IGFBP3, QSOX1, TES, DHCR24, CSF1R	0.00786385	0.250598			GO:0002548	monocyte chemotaxis	6	2.12014	0.000523615	CCL2, FOLR2, CCL21, ANXA1, CCL19, CCL5	0.0175624	0.872537			GO:0008201	heparin binding	14	4.92958	2.05684e-06	KNG1, LPL, NDNF, SLIT2, PCOLCE2, LPA, APOE, VEGFA, APOH, TGFBR3, HRG, ANGPTL3, FGF1, AOC1	0.00016659	0.00306974
	GO:0050777	negative regulation of immune response	5	1.1236	0.000155495	LILRB2, LYN, COL3A1, INPP5D, TGFB2	0.00837936	0.273135			GO:0002523	leukocyte migration involved in inflammatory response	4	1.41343	0.000603277	CCL2, S100A8, S100A9, ITGB2	0.0197911	1.00465			GO:0016597	amino acid binding	6	2.11268	2.24136e-05	DDC, ASS1, DPYS, PAH, AGXT, GCHFR	0.00161249	0.0334464
	GO:0043206	extracellular fibril organization	5	1.1236	0.000155495	LTBP2, COL3A1, ADAMTS3, MFAP4, COL5A1	0.00837936	0.273135			GO:0030593	neutrophil chemotaxis	7	2.4735	0.000636904	CCL2, S100A8, S100A9, CXCL8, FCER1G, ITGB2, CCL5	0.0204612	1.06037			GO:0005102	receptor binding	18	6.33803	6.55748e-05	KNG1, ACOX2, ECI2, LPL, EHHADH, EPHX2, AGXT, PIPOX, PLG, PECR, DHRS4, ADM, HAO2, IDH1, HRG, DAO, SLC27A2, DPP4	0.00424037	0.097824
	GO:0034113	heterotypic cell-cell adhesion	6	1.34831	0.000167443	LILRB2, ITGA7, CD2, ITGB2, ITGA4, ITGB3	0.00882511	0.294093			GO:0050871	positive regulation of B cell activation	5	1.76678	0.000719163	IGHD, IGKC, IGHM, IGLL5, IGLC1	0.0226179	1.19655			GO:0052890	oxidoreductase activity, acting on the CH-CH group of donors, with a flavin as acceptor	5	1.76056	7.93605e-05	ACOX2, GCDH, ACADSB, ACAD8, ACADL	0.00466433	0.118378
	GO:0010951	negative regulation of endopeptidase activity	12	2.69663	0.000205606	C4A, SERPINE2, SERPINF1, C3, COL6A3, SERPINA3, TFPI, SLPI, ITIH2, ITIH3, CSTA, WFDC2	0.0103771	0.361008			GO:0006957	complement activation, alternative pathway	4	1.41343	0.00102123	C3, CFH, CFD, VSIG4	0.0313525	1.69511			GO:0042802	identical protein binding	28	9.85915	8.66039e-05	RALYL, ALAD, SORD, ASS1, ERBB3, HSD17B14, GLUD1, ALDOB, BNIP3, PBLD, APOE, ALB, APOH, AKR7A3, ALDH4A1, DPP4, CRYAA, MAT2A, PCBD1, FBP1, NPL, SLIT2, CTH, DNPH1, VEGFA, PRNP, DCXR, SH3GL2	0.00466589	0.129176
	GO:0048246	macrophage chemotaxis	5	1.1236	0.000220233	EDNRB, CCL2, CKLF, CX3CR1, CCL5	0.0108858	0.386643			GO:0043542	endothelial cell migration	5	1.76678	0.00110043	CYP1B1, PECAM1, ITGB2, PRKX, S100A2	0.033106	1.82544			GO:0003995	acyl-CoA dehydrogenase activity	5	1.76056	0.000104472	ACOX2, GCDH, ACADSB, ACAD8, ACADL	0.00519427	0.155809
	GO:0006898	receptor-mediated endocytosis	15	3.37079	0.000222071	MRC1, MSR1, IGLV1-44, TMPRSS4, CD163, ADRB2, CD36, FOLR2, STAB1, FCGR1A, FCGR1B, LOXL2, IGKC, IGLC1, DNM1	0.0107578	0.389863			GO:0016337	single organismal cell-cell adhesion	8	2.82686	0.00117101	ICAM1, CD44, CD93, ICAM2, CD2, CSTA, SOX9, CDH3	0.0345404	1.94145			GO:0016620	oxidoreductase activity, acting on the aldehyde or oxo group of donors, NAD or NADP as acceptor	5	1.76056	0.000214142	ALDH8A1, ALDH7A1, ALDH1L1, ALDH4A1, ALDH3A2	0.00986381	0.319126
	GO:0030889	negative regulation of B cell proliferation	5	1.1236	0.000302331	CDKN2A, LYN, CD300A, MNDA, INPP5D	0.0143333	0.530414			GO:0051092	positive regulation of NF-kappaB transcription factor activity	9	3.18021	0.001334	ICAM1, S100A8, CLU, S100A9, PYCARD, LTF, PRKCH, ITGB2, TRIM22	0.0385427	2.20884			GO:0070403	NAD+ binding	4	1.40845	0.00106099	CRYL1, GLUD1, HADH, HPGD	0.0448234	1.57186
	GO:0002250	adaptive immune response	13	2.92135	0.000313471	LAIR1, LYN, PIK3CD, CTSS, PRKCB, LILRB2, SH2D1A, LAT2, CD86, CD209, FCGR1B, CLEC4A, SYK	0.0145739	0.549907			GO:0033627	cell adhesion mediated by integrin	4	1.41343	0.00158675	NOV, ICAM1, ITGB6, ITGB3	0.04487	2.62213
	GO:0071300	cellular response to retinoic acid	9	2.02247	0.000321715	MUC1, NTRK3, RET, CCL2, SERPINF1, LYN, TNC, COL1A1, SOX9	0.0146743	0.564331			Cellular Component
	GO:0007160	cell-matrix adhesion	10	2.24719	0.000380346	LYVE1, CD44, HPSE, COL13A1, COL3A1, ITGA7, ITGB2, NID2, ITGA4, ITGB3	0.0170077	0.666853			GO:0005615	extracellular space	82	28.9753	1.76831e-28	PXDN, S100A8, LY86, IGFBP6, S100A9, MMP7, FSTL1, POSTN, IGHM, IL4R, TGFBI, CFH, SERPINA3, CPA3, LTF, CFD, SPON2, LTB, LOXL1, SPON1, ICAM1, CTSZ, LY96, LYZ, CECR1, ACTN1, SERPING1, CTSS, PIGR, THBD, CPE, CST6, TACSTD2, COL1A2, SLPI, DEFA1, VCAN, LAMC2, CSTA, COL1A1, TNFAIP2, WFDC2, CXCL1, CCL2, C3, TNC, LUM, CLU, COL3A1, TAC1, CXCL8, CXCL6, SFN, CCL5, ITGAM, TIMP1, CCL21, COL6A3, IGKC, FN1, MUC1, …	4.54456e-26	2.30718e-25
	GO:0048010	vascular endothelial growth factor receptor signaling pathway	9	2.02247	0.00039077	VEGFC, CYBB, CCL2, NCF2, MAPK13, NCF1, NCF4, ITGB3, VAV1	0.017155	0.68507			GO:0070062	extracellular exosome	106	37.4558	1.01813e-20	A2M, RARRES1, S100A8, S100A9, MMP7, TSPAN8, FSTL1, CD53, IGHM, CD48, CD44, TGFBI, CFH, RRAS, SPON2, NQO1, CFD, IGLL5, ACTN1, SERPING1, BASP1, C1QB, KRT19, CPE, CST6, TACSTD2, IGHD, COL1A2, MNDA, DEFA1, CSTA, VSIG4, WFDC2, IFITM3, CLU, ITGB2, ITGB3, ITGAM, TIMP1, REG1A, RAC2, ITGB6, IGKC, FN1, MEST, MUC1, ST6GAL1, EFEMP1, S100A11, S100A13, PSMB9, LCN2, CORO1A, PAPPA2, MARCKS, PXDN, MARCKSL1, IGFBP…	1.3083e-18	1.32839e-17
	GO:0071356	cellular response to tumor necrosis factor	11	2.47191	0.000396631	PID1, CCL2, SFRP1, CCL21, PYCARD, CCL8, CXCL8, CCL19, COL1A1, CCL5, CCL18	0.0171019	0.695312			GO:0031012	extracellular matrix	32	11.3074	1.46035e-17	PXDN, LUM, TNC, S100A9, COL3A1, CLU, VIM, MMP7, POSTN, NOV, CD93, COL6A3, TGFBI, TGM2, LOXL1, THBS2, TFPI2, FN1, SPON1, COL4A2, COL4A1, CRIP2, EFEMP1, COL15A1, VWF, COL1A2, SLPI, VCAN, DEFA1, COL1A1, CSTA, TPSAB1	1.25103e-15	1.90537e-14
	GO:0090026	positive regulation of monocyte chemotaxis	5	1.1236	0.000528549	CCL2, CCR1, CCR2, PLA2G7, CCL5	0.0223321	0.925557			GO:0005576	extracellular region	71	25.0883	1.24038e-16	A2M, IGLV1-44, S100A8, S100A9, IGFBP6, MMP7, FSTL1, NOV, TGFBI, SERPINA3, CFH, CPA3, LTF, CASP1, CFD, TPSB2, LOXL1, GZMA, LYZ, CECR1, ACTN1, SERPING1, CTSS, CD163, C1QB, GZMK, COL1A2, DEFA1, VCAN, LAMC2, COL1A1, WFDC2, CXCL1, CCL2, C3, TNC, LUM, CLU, COL3A1, CXCL8, TAC1, C1S, CXCL6, CCL5, TIMP1, FOLR2, CCL21, GLIPR1, FCN1, COL6A3, CD2, PYCARD, IGKC, THBS2, FN1, COL4A2, COL4A1, PLEK, EFEMP1, RNASE…	7.10543e-15	1.44329e-13
	GO:0002548	monocyte chemotaxis	7	1.57303	0.000542676	CCL2, FOLR2, CCL21, CCL8, CCL19, CCL5, CCL18	0.0225315	0.950184			GO:0005886	plasma membrane	109	38.5159	2.41585e-10	S100A8, IGLV1-44, S100A9, CD53, IGHM, CD48, CD44, TIAM1, TGFBI, RRAS, KLRB1, CD3D, ACTN1, TNFRSF17, BASP1, SLC34A2, KRT19, THBD, CPE, IGHD, CCR2, CX3CR1, HLA-DPA1, PMP22, EMP3, EMP1, IFITM1, IFITM2, IFITM3, ITGB2, ITGB3, ITGAM, SLCO2A1, RAC2, ITGB6, FCER1G, HLA-DPB1, IGKC, TYROBP, MRC1, FCER1A, TESC, MCAM, CORO1A, KCNJ8, NLGN4X, RGS5, MARCKS, CLEC7A, IL27RA, CLDN4, MARCKSL1, LY86, CD93, CSF2RB, F…	1.24175e-08	3.15205e-07
	GO:0048247	lymphocyte chemotaxis	6	1.34831	0.000553135	CCL2, CCL21, CKLF, CCL8, CCL19, CCL18	0.0225761	0.968413			GO:0009897	external side of plasma membrane	20	7.06714	5.70447e-10	FCER1A, ICAM1, PTPRC, SELP, SELL, MCAM, IGHM, CD48, CD86, CD69, IGHD, PECAM1, ITGB6, CD2, FCER1G, FCGR3A, IGKC, IGLL5, IGLC1, ENG	2.44341e-08	7.44284e-07
	GO:0007267	cell-cell signaling	17	3.82022	0.000606423	CCR1, CCL8, ITGB2, CXCL6, CCL5, CCL18, TGFB2, C1QA, INHBA, LILRB2, CD86, TNFSF10, SH2D1A, ADRB2, CCR5, CCL21, STAB1	0.0243176	1.06124			GO:0005887	integral component of plasma membrane	51	18.0212	1.08553e-08	IL27RA, CLDN4, TSPAN8, CD52, CD53, CD48, CD44, IL4R, CSF2RB, EVI2B, ICAM1, PTGER1, ICAM2, PIGR, SLC34A2, CD163, THBD, TACSTD2, CCR2, CX3CR1, HLA-DPA1, TM4SF1, MMD, ITGB3, FXYD5, SLCO2A1, HRH1, LAPTM5, CD69, CD2, FCER1G, SLCO3A1, TYROBP, MRC1, LY75, FCER1A, MUC1, SELP, PTPRC, SELL, CD1C, NPY1R, ITPR3, TPBG, PROM1, SLC16A5, CYBB, STAB1, NLGN4X, ABCC3, ABCC1	3.98546e-07	1.41634e-05
	GO:0031623	receptor internalization	7	1.57303	0.000617708	CAV1, CD36, CXCL8, FCER1G, ITGB2, DNM1, SYK	0.0243636	1.08089			GO:0009986	cell surface	29	10.2473	1.41295e-08	CLU, MMP7, ITGB2, ITGB3, CD53, IGHM, HLA-DMA, ITGAM, SRPX, CD93, FOLR2, CD44, CD2, LTF, FCER1G, HLA-DPB1, TYROBP, MRC1, FCER1A, ICAM1, PTPRC, ANXA1, TPBG, PROM1, CD86, THBD, NLGN4X, HLA-DPA1, ENG	4.5391e-07	1.84353e-05
	GO:0001933	negative regulation of protein phosphorylation	8	1.79775	0.000739489	NTRK3, PID1, FBLN1, LYN, MICAL1, PRR5L, FAM129A, IGFBP3	0.0281875	1.29268			GO:0005578	proteinaceous extracellular matrix	20	7.06714	2.55311e-08	PXDN, ADAMTSL3, LUM, EFEMP1, MMP7, COL15A1, POSTN, TIMP1, NOV, VWF, CCL21, COL6A3, TGFBI, COL1A2, ADAMTS1, VCAN, SPON2, TFPI2, FN1, SPON1	7.29054e-07	3.33114e-05
	GO:0001766	membrane raft polarization	4	0.898876	0.000765098	DOCK2, MALL, CD2, MAL	0.0287008	1.33716			GO:0072562	blood microparticle	15	5.30035	7.39727e-08	A2M, C3, CLU, SERPING1, C1S, IGHM, C1QB, IGHD, CFH, SERPINA3, CP, IGKC, IGLC1, IGLL5, FN1	1.9011e-06	9.6515e-05
	GO:0044344	cellular response to fibroblast growth factor stimulus	6	1.34831	0.00077016	CCL2, CD44, SFRP1, CXCL8, COL1A1, CCL5	0.02845	1.34595			GO:0031093	platelet alpha granule lumen	10	3.53357	1.196e-07	VWF, A2M, CLU, SERPINA3, ACTN1, SERPING1, HGF, CFD, FN1, TIMP1	2.79428e-06	0.000156046
	GO:0016525	negative regulation of angiogenesis	8	1.79775	0.000816194	CCL2, SERPINF1, STAB1, CCR2, CX3CR1, PTN, THBS2, VASH1	0.0296757	1.42586			GO:0005925	focal adhesion	20	7.06714	7.83296e-06	ICAM1, PTPRC, FHL1, TNC, VIM, ANXA1, FHL2, ACTN1, PDLIM1, ITGB3, MCAM, RAC2, CD44, ITGB6, TGM2, RRAS, MARCKS, ENG, AHNAK, TES	0.000167742	0.0102195
	GO:0050870	positive regulation of T cell activation	5	1.1236	0.000854534	CCL2, CCR2, LCK, PYCARD, HLA-DPA1	0.0305921	1.49236			GO:0016021	integral component of membrane	111	39.2226	1.50089e-05	RARRES1, CD52, CD53, IGHM, CD48, CD44, NQO1, KLRB1, CD3D, TNFRSF17, CHODL, LHFP, MOXD1, SLC34A2, TACSTD2, IGHD, CCR2, CX3CR1, HLA-DPA1, ADAMTS1, COL1A1, PMP22, VSIG4, EMP3, EMP1, CYP1B1, LST1, IFITM1, IFITM2, IFITM3, MMD, ITGB3, FXYD5, ITGAM, SLCO2A1, CD69, FCER1G, HLA-DPB1, RUNX1, TYROBP, MEST, LAPTM4B, FCER1A, MUC1, ST6GAL1, MCAM, UCP2, KCNJ8, NLGN4X, CLEC7A, ENG, IL27RA, CLDN4, HLA-DMA, CD93, …	0.000296673	0.0195809
	GO:0050731	positive regulation of peptidyl-tyrosine phosphorylation	9	2.02247	0.000939483	LIF, FCER1A, VEGFC, CD36, CD44, CSPG4, HGF, ITGB3, SYK	0.0330975	1.63957			GO:0005604	basement membrane	8	2.82686	0.000185247	COL4A1, TNC, TGFBI, ADAMTS1, THBS2, LOXL1, TIMP1, ANXA2P2	0.00339514	0.241429
	GO:0071230	cellular response to amino acid stimulus	7	1.57303	0.00100129	COL3A1, COL1A2, COL6A1, COL1A1, COL16A1, MMP2, COL5A2	0.0347354	1.74654			GO:0005581	collagen trimer	8	2.82686	0.00047448	C1QB, COL3A1, COL6A3, FCN1, COL1A2, COL15A1, COL1A1, TIMP1	0.00809839	0.617306
	GO:0001974	blood vessel remodeling	6	1.34831	0.0010451	LIF, BGN, CCR2, TGM2, JAG1, TGFB2	0.0357201	1.8223			GO:0001772	immunological synapse	5	1.76678	0.00162552	ICAM1, CORO1A, GZMA, LCK, CD53	0.0257926	2.10023
	GO:0001960	negative regulation of cytokine-mediated signaling pathway	4	0.898876	0.00112665	PTPRC, CAV1, PXDN, IL1RN	0.0379234	1.96317			GO:0016020	membrane	51	18.0212	0.00180299	CD52, HLA-DMA, CD48, SRPX, RRAS, FAM129A, AHNAK, ICAM1, ICAM2, IFI16, TRBC1, CD163, TACSTD2, LAMC2, VCAN, EMP3, FKBP11, EMP1, GALNT3, HLA-DQB1, LST1, IFITM1, TNC, CD247, MMD, ITGB2, FXYD5, CDH3, SLCO2A1, FOLR2, RAC2, GLIPR1, HLA-DPB1, ACSL4, PHLDA2, LAPTM4B, PLP2, SELP, PTPRC, PLEK, SELL, HCLS1, HGF, ITPR3, ANXA3, TMPRSS4, SLC16A5, CORO1A, ABCC3, ABCC1, CD302	0.0269128	2.32705
	GO:0071404	cellular response to low-density lipoprotein particle stimulus	4	0.898876	0.00112665	CD36, FCER1G, ITGB2, SYK	0.0379234	1.96317			GO:0005788	endoplasmic reticulum lumen	10	3.53357	0.00255189	COL4A2, CTSZ, COL4A1, COL3A1, COL6A3, COL1A2, COL15A1, COL1A1, RCN1, SPON1	0.0358244	3.27885
	GO:0001934	positive regulation of protein phosphorylation	11	2.47191	0.00122159	NTRK3, EDNRB, CCND2, C3, RASGRP1, ITGB3, PRR5L, SOX9, FAM129A, CSF1R, PLAUR	0.040496	2.12692			GO:0042571	immunoglobulin complex, circulating	4	1.41343	0.00272535	IGHD, IGKC, IGLL5, IGLC1	0.0362412	3.49807
	GO:0008284	positive regulation of cell proliferation	24	5.39326	0.00136214	LYN, TNC, CD248, CRLF1, SOX4, LEF1, HGF, SOX9, TGFB2, NTRK3, LIF, EDNRB, VEGFC, CD86, RAC2, SFRP1, FOLR2, CCND2, ADRA2A, PDGFRA, PTN, LAMC2, FN1, CSF1R	0.0444485	2.36887			Molecular Function
	GO:0070374	positive regulation of ERK1 and ERK2 cascade	13	2.92135	0.0013888	CCL2, CD36, CD44, CCL21, RASGRP1, CCR1, PDGFRA, PYCARD, CCL8, CCL19, CCL5, CCL18, CSF1R	0.0447008	2.41471			GO:0004872	receptor activity	18	6.36042	3.84271e-08	MRC1, LY75, ICAM1, MMD, ACKR1, TNFRSF17, ITGB2, ITGB3, CD48, CD86, THBD, CD93, TACSTD2, IL10RA, NLGN4X, ITGB6, CD2, CSF2RB	1.59471e-05	5.38855e-05
	Cellular Component										GO:0008201	heparin binding	15	5.30035	1.60914e-07	SELP, CCL2, SELL, MMP7, CECR1, POSTN, FSTL1, CXCL6, NOV, CFH, LTF, ADAMTS1, LAMC2, THBS2, FN1	3.3389e-05	0.000225645
	Term	Term	Count	%	PValue	Genes	Benjamini	FDR			GO:0004252	serine-type endopeptidase activity	18	6.36042	3.93539e-07	IGLV1-44, C3, GZMA, MMP7, CTSS, C1S, HGF, TMPRSS4, C1QB, GZMK, FCN1, C1RL, LTF, IGKC, CFD, TPSAB1, TPSB2, IGLC1	5.44382e-05	0.00055185
	GO:0005576	extracellular region	122	27.4157	1.44686e-31	LYPD1, IGLV1-44, F13A1, MMP7, CSPG4, JAG1, MMP2, TGFB2, SERPINE2, CFH, CPA3, CFD, TPSB2, C4A, OLFML2B, ACTN1, PRELP, C1QA, VEGFC, C1QB, SERPINF1, LAMC3, TFPI, COL1A2, TUBA4A, LAMC2, COL1A1, ADAMTS3, MFAP4, WFDC2, CCL2, CLU, ELN, APOC1, IL33, CCL5, EPHB2, LIF, FOLR2, CKLF, IGKC, HIST1H4J, FN1, CFB, HGF, COL16A1, TNFSF10, LAMA4, COL14A1, SFRP1, SFRP4, PAPPA2, TPSAB1, TLL2, PLAU, COL21A1, IGFBP6, CD…	4.96272e-29	1.97289e-28			GO:0005201	extracellular matrix structural constituent	10	3.53357	7.56188e-07	COL4A2, PXDN, COL4A1, LUM, COL3A1, COL1A2, COL15A1, VCAN, COL1A1, TFPI2	7.84514e-05	0.00106038
	GO:0031012	extracellular matrix	52	11.6854	3.51027e-29	AEBP1, PXDN, LTBP2, COL21A1, MMP7, MMP2, TGFB2, SERPINE2, RPL12, LOXL2, SPON1, PRELP, JUP, BGN, SERPINF1, COL1A2, SLPI, RPS10, VCAN, COL1A1, CSTA, MFAP4, ADAMTS3, FMOD, LUM, TNC, COL3A1, CLU, PCOLCE, COMP, COL6A3, TGM2, COL6A1, FBN2, COL8A1, THBS2, COL8A2, HIST1H4J, FN1, FBN1, LMCD1, COL15A1, NID2, COL5A2, COL5A1, SOD3, VWF, LAMA4, FBLN1, COL14A1, SFRP1, TPSAB1	6.02012e-27	4.78651e-26			GO:0030246	carbohydrate binding	15	5.30035	1.89148e-06	KLRB1, LY75, GALNT3, SELP, SELL, CHODL, CLC, CLEC10A, REG1A, CD93, CD69, FCN1, VCAN, CLEC7A, CD302	0.000156981	0.00265235
	GO:0005615	extracellular space	104	23.3708	3.70194e-27	LTBP2, MMP7, MMP2, TGFB2, SERPINE2, PPP1R1A, FAP, CFH, CPA3, SPON2, CFD, SPON1, C4A, SPARCL1, ACTN1, VASH1, PRELP, LILRB2, VEGFC, THBD, CD36, SERPINF1, CPE, CST6, TACSTD2, TFPI, COL1A2, LAMC2, CSTA, COL1A1, ADAMTS3, WFDC2, CCL2, CLU, CYTL1, CCL8, IL33, CCL5, ABCA3, ADA, ITGAM, LIF, CKLF, IGKC, FN1, MUC1, CFB, IL1RN, LMCD1, HGF, MCAM, TNFSF10, COL14A1, SFRP1, NLGN4X, SFRP4, TPSAB1, AGR2, PLAU, PXD…	4.23255e-25	5.04786e-24			GO:0005178	integrin binding	11	3.88693	4.55559e-06	NOV, ICAM1, VWF, LYN, ICAM2, TGFBI, COL3A1, ITGB6, ACTN1, TSPAN8, FN1	0.000315046	0.00638801
	GO:0005578	proteinaceous extracellular matrix	41	9.21348	1.05472e-20	FMOD, PXDN, LTBP2, COL21A1, ADAMTSL3, LUM, CD248, ELN, MMP7, MMP2, HPSE, CCL21, COMP, COL6A3, FBN2, SPON2, GPC1, COL11A1, COL8A2, SPON1, FN1, TNXA, CRTAC1, SPARCL1, OLFML2B, FBN1, COL15A1, COL16A1, COL5A2, COL5A1, WNT2B, PRELP, VWF, FBLN1, COL14A1, BGN, SFRP1, LAMC3, COL1A2, VCAN, ADAMTS3	9.04425e-19	1.43819e-17			GO:0002020	protease binding	10	3.53357	2.35587e-05	LCN2, VWF, A2M, CST6, SELL, PYCARD, CSTA, ITGB3, FN1, TIMP1	0.00139573	0.0330307
	GO:0070062	extracellular exosome	129	28.9888	5.53199e-14	RARRES1, LTBP2, MMP7, CSPG4, CD53, CD48, CD44, CFH, RPL12, CFD, SPON2, PDXK, C4A, CRTAC1, SPARCL1, ACTN1, TMEM132A, PRELP, OGFOD3, PLAUR, C1QA, JUP, C1QB, LAT2, KRT19, SERPINF1, CPE, CST6, TACSTD2, MNDA, COL1A2, TUBA4A, RPS10, CSTA, ADAMTS3, MFAP4, VSIG4, WFDC2, STK10, CLU, APOC1, ITGB2, ITGB3, ITGAM, DOCK2, RAC2, PPL, IGKC, ENTPD1, HIST1H4J, FN1, MEST, MUC1, CFB, IL1RN, ITGA4, TNFSF10, CKMT1A, L…	3.79285e-12	7.53952e-11			GO:0004888	transmembrane signaling receptor activity	14	4.947	2.5312e-05	KLRB1, LY75, MRC1, ICAM1, CLDN4, CD3D, IL27RA, CD247, ACKR1, THBD, FCGR2B, EVI2A, CD69, ENG	0.00131222	0.0354886
	GO:0009986	cell surface	45	10.1124	1.31796e-12	CLU, MMP7, CSPG4, PLVAP, ITGB2, L1CAM, CD53, ITGB3, LPAR1, ADA, ITGAM, CD44, FOLR2, FAP, CD2, LTF, FCER1G, PTN, CD24, TYROBP, CD28, CSF1R, MRC1, CIITA, FCER1A, PTPRC, ITGA4, SLC7A11, LILRB2, CD86, CD36, BGN, THBD, SFRP1, CCR5, CD209, SFRP4, ITGA7, NLGN4X, TFPI, CA4, HLA-DPA1, CLEC5A, PLAU, AOC3	7.53426e-11	1.79711e-09			GO:0008009	chemokine activity	7	2.4735	9.48907e-05	CXCL1, CCL2, CCL21, CXCL8, CCL19, CXCL6, CCL5	0.00436616	0.132981
	GO:0005581	collagen trimer	18	4.04494	5.30522e-11	MSR1, COL21A1, COL13A1, COL3A1, COL15A1, COL5A2, PCOLCE, COL5A1, C1QA, C1QB, COL14A1, CD36, COL6A3, COL1A2, COL6A1, COL1A1, COL8A2, COL11A1	2.59956e-09	7.23405e-08			GO:0005509	calcium ion binding	26	9.18728	0.000102232	GALNT3, S100A8, S100A9, FSTL1, C1S, CDH3, CDH6, PLCB4, CD93, CD69, RUNX1, THBS2, S100A2, TESC, EFEMP1, ANXA1, S100A11, ACTN1, ITPR3, ANXA3, S100A13, ANXA2P2, THBD, STAB1, VCAN, RCN1	0.00423386	0.143262
	GO:0005886	plasma membrane	158	35.5056	7.82501e-11	LYPD1, GNA15, ADCY7, IGLV1-44, TLR1, L1CAM, CD53, JAG1, TLR5, LPAR1, MMP2, TLR7, CD48, DIRAS2, MALL, CD44, FAP, CLEC4A, SYK, RET, C4A, CD3D, PIK3CD, ACTN1, PLAUR, JUP, LILRB2, LAT2, KRT19, THBD, CD36, CPE, CCR5, CCR2, CX3CR1, TFPI, PDGFRA, HLA-DPA1, PMP22, CLEC5A, EMP1, ABCA8, CAV2, CAV1, IFITM1, STK10, ITGB2, BDKRB2, ITGB3, ABCA3, ADA, ITGAM, EPHB2, RAC2, PPL, ADRA2A, AHNAK2, FCER1G, RAP1GAP2, I…	3.35497e-09	1.067e-07			GO:0048407	platelet-derived growth factor binding	4	1.41343	0.000525705	COL4A1, COL3A1, COL1A2, COL1A1	0.0196431	0.734665
	GO:0031093	platelet alpha granule lumen	12	2.69663	5.87426e-08	ISLR, VEGFC, VWF, F13A1, CLU, SERPINA3, ACTN1, HGF, CFD, QSOX1, FN1, TGFB2	2.01487e-06	8.00997e-05			GO:0034987	immunoglobulin receptor binding	5	1.76678	0.000602617	IGHD, IGKC, IGHM, IGLL5, IGLC1	0.020631	0.841728
	GO:0005788	endoplasmic reticulum lumen	19	4.26966	8.5382e-07	STS, PTGS2, COL21A1, COL13A1, COL3A1, COL15A1, COL16A1, COL5A2, COL5A1, PLAUR, COL14A1, COL6A3, COL1A2, COL6A1, COL1A1, COL8A1, COL8A2, COL11A1, SPON1	2.66233e-05	0.00116424			GO:0003823	antigen binding	8	2.82686	0.000999866	CD48, IGLV1-44, IGHD, IGKC, SPON2, IGHM, IGLL5, IGLC1	0.0314302	1.393
	GO:0045121	membrane raft	19	4.26966	2.36558e-06	RAP2B, PTPRC, CAV2, RET, CAV1, LYN, TLR1, MAL, CD48, EDNRB, TNFRSF1B, LAT2, MALL, CD36, HPSE, LCK, CD24, INPP5D, GPC1	6.7614e-05	0.00322559			GO:0043208	glycosphingolipid binding	3	1.06007	0.00135758	SELP, LYN, SELL	0.0394699	1.88697
	GO:0005604	basement membrane	12	2.69663	2.65263e-06	LAMA4, FBLN1, SERPINF1, LAMC3, TNC, FBN1, PTN, NID2, LOXL2, THBS2, COL8A2, COL5A1	6.99861e-05	0.00361698			GO:0032395	MHC class II receptor activity	4	1.41343	0.00138576	HLA-DQB1, HLA-DPA1, HLA-DPB1, HLA-DMA	0.0376392	1.92578
	GO:0005925	focal adhesion	24	5.39326	7.07041e-05	PTPRC, CAV2, CAV1, TNC, CSPG4, ACTN1, L1CAM, ITGB3, ITGA4, RPL38, MCAM, ARHGAP26, PLAUR, JUP, RAC2, CD44, FAP, TGM2, MARCKS, RPS10, RPL37A, RPL12, PLAU, TES	0.00173081	0.096367
	GO:0016020	membrane	81	18.2022	7.3595e-05	ATP6V0E1, MSR1, TLR1, PIP5K1B, CD52, JAG1, CD48, BZW2, HPSE, SV2B, RPL12, LMOD1, FAM129A, LOXL2, DHCR24, RAP2B, RET, STS, NCF4, IFI16, TRBC1, SLC7A11, CD163, OGFOD3, VEGFC, LILRB2, CD36, LAMC3, TACSTD2, PDGFRA, SEMA4C, CA4, VCAN, LAMC2, RPS10, FILIP1L, EMP1, BID, GALNT3, GGCX, CAV2, PRF1, CAV1, GALNT1, IFITM1, TNC, CD247, ITGB2, CDH3, ABCA3, ADA, DOCK2, FOLR2, RAC2, GLIPR1, RASGRP1, CKLF, COL6A1,…	0.00168152	0.100305
	GO:0043202	lysosomal lumen	10	2.24719	0.000191748	FMOD, BGN, HPSE, LUM, CSPG4, VCAN, CTSS, MAN2B1, GPC1, PRELP	0.00410256	0.261146
	GO:0072562	blood microparticle	13	2.92135	0.00029442	C4A, CFB, C3, F13A1, CLU, C1QB, SERPINA3, CFH, ITIH2, CP, IGKC, IGLC1, FN1	0.00592361	0.400716
	GO:0005796	Golgi lumen	10	2.24719	0.000479672	MUC1, FMOD, BGN, LUM, HS3ST1, CSPG4, VCAN, GPC1, SOD3, PRELP	0.00910094	0.652088
	GO:0009897	external side of plasma membrane	14	3.14607	0.00188552	FCER1A, PTPRC, CCR1, MCAM, ADA, CD48, CD86, CD36, CCR5, CD2, FCER1G, IGKC, IGLC1, CD28	0.0334969	2.54064
	GO:0016021	integral component of membrane	152	34.1573	0.00194924	MPZL2, RARRES1, ADCY7, TLR1, CSPG4, L1CAM, CD52, CD53, JAG1, LPAR1, TLR5, TLR7, CD48, MALL, CD44, ST3GAL5, CH25H, FAP, CLEC4A, ELOVL6, RET, CD3D, TMEM132A, MOXD1, PLAUR, OGFOD3, IGSF6, LILRB2, LAT2, CD36, CCR5, TACSTD2, CCR2, CX3CR1, HLA-DPA1, COL1A1, PMP22, VSIG4, TM6SF1, CLEC5A, EMP1, GGCX, ABCA8, CAV2, CAV1, IFITM1, BDKRB2, IL33, ITGB3, ABCA3, ITGAM, EPHB2, CKLF, SLC35F2, FCER1G, DYRK2, ENTPD1…	0.0329084	2.62544
	GO:0043020	NADPH oxidase complex	4	0.898876	0.00253067	CYBB, NCF2, NCF1, NCF4	0.0405419	3.39611
	Molecular Function
	Term	Term	Count	%	PValue	Genes	Benjamini	FDR
	GO:0005201	extracellular matrix structural constituent	20	4.49438	9.08481e-16	PXDN, LUM, COL3A1, FBN1, ELN, COL15A1, COL5A2, COL5A1, PRELP, FBLN1, LAMA4, BGN, COL14A1, COMP, COL1A2, VCAN, COL1A1, FBN2, COL8A2, COL11A1	5.48006e-13	1.32117e-12
	GO:0008201	heparin binding	22	4.94382	2.70253e-10	FMOD, CCL2, LTBP2, COL13A1, FBN1, MMP7, CCL8, CXCL6, PCOLCE, COL5A1, SOD3, PRELP, SERPINE2, SFRP1, COMP, CFH, LTF, PTN, LAMC2, ADAMTS3, THBS2, FN1	8.3373e-08	4.00669e-07
	GO:0004252	serine-type endopeptidase activity	22	4.94382	1.00385e-06	C4A, IGLV1-44, CFB, C3, GZMA, MMP7, CTSS, HGF, MMP2, TMPRSS4, C1QA, C1QB, GZMK, FAP, LTF, IGKC, TLL2, CFD, TPSAB1, TPSB2, IGLC1, PLAU	0.000206436	0.00148826
	GO:0008009	chemokine activity	10	2.24719	2.15993e-06	CXCL1, CCL2, CCL21, CKLF, CCL8, CXCL8, CCL19, CXCL6, CCL5, CCL18	0.000333114	0.0032022
	GO:0048407	platelet-derived growth factor binding	6	1.34831	3.21926e-06	COL3A1, PDGFRA, COL1A2, COL6A1, COL1A1, COL5A1	0.000397179	0.00477268
	GO:0004872	receptor activity	19	4.26966	5.39296e-06	MRC1, RET, CRLF1, TLR1, ACKR1, ITGB2, ITGB3, TLR5, TLR7, PLAUR, CD48, LILRB2, LYVE1, CD86, THBD, TACSTD2, IL10RA, NLGN4X, CD2	0.000554424	0.00799515
	GO:0005518	collagen binding	10	2.24719	1.23056e-05	VWF, COL14A1, CD44, SPARCL1, LUM, COMP, NID2, CTSS, PCOLCE, FN1	0.00108407	0.0182424
	GO:0050840	extracellular matrix binding	7	1.57303	2.85479e-05	BGN, SPARCL1, CD248, OLFML2B, ELN, ITGB3, COL11A1	0.00219936	0.0423159
	GO:0030674	protein binding, bridging	10	2.24719	9.37087e-05	CAV2, CAV1, ADAP2, COL14A1, WWC1, COL1A2, CSTA, COL11A1, COL8A2, NEFL	0.00640396	0.13884
	GO:0019864	IgG binding	5	1.1236	9.51458e-05	FCGR2B, FCGR1A, FCGR1B, FCER1G, FCGR2A	0.00585358	0.140968
	GO:0005178	integrin binding	11	2.47191	0.000218968	VWF, FBLN1, LYN, FAP, COL3A1, FBN1, ACTN1, COL16A1, COL5A1, FN1, SYK	0.0122083	0.324145
	GO:0005515	protein binding	247	55.5056	0.000275033	TUBB2B, PTGS2, LTBP2, DZIP1, PDLIM4, CD53, LPAR1, CD48, MALL, CD44, SERPINE2, FAP, PPP1R1A, CFH, RPL12, TPSB2, S100A2, SYK, NCF2, CRTAC1, NCF1, NCF4, PIK3CD, VASH1, PLAUR, JUP, C1QA, C1QB, LILRB2, VEGFC, KRT19, CD36, CCR5, SERPINF1, TACSTD2, CX3CR1, PDGFRA, TUBA4A, RPS10, PMP22, ADAMTS3, ELN, BDKRB2, DENND2D, ADA, EPHB2, LIF, FCER1G, AHNAK2, RAP1GAP2, BLNK, TYROBP, HPCAL4, IL1RN, TPD52L1, HGF, CO…	0.0140437	0.406981
	GO:0004866	endopeptidase inhibitor activity	7	1.57303	0.000358183	C4A, C3, TFPI, SLPI, ITIH2, ITIH3, WFDC2	0.0168592	0.529719
	GO:0005507	copper ion binding	8	1.79775	0.000371153	HEPH, CP, LOXL2, GPC1, MOXD1, SOD3, SCO2, AOC3	0.0162272	0.548851
	GO:0042803	protein homodimerization activity	34	7.64045	0.000396349	CAV2, PTGS2, STK10, CD247, PLVAP, CCL5, TGFB2, RASGRP1, ALDH1A3, FAP, CD2, PYCARD, ADRA2A, BHLHE41, HPGDS, CSF1R, PDXK, PLEK, GZMA, SYT11, ACTN1, TPD52L1, MID1, ECT2, TENM4, JUP, VWF, C1QB, ADRB2, CCR2, NLGN4X, PDGFRA, AGR2, AOC3	0.0161742	0.586009
	GO:0015026	coreceptor activity	6	1.34831	0.000681213	CD86, CCR5, LY96, ITGA4, ITGB3, CD28	0.025936	1.0052
	GO:0050839	cell adhesion molecule binding	8	1.79775	0.000695708	TENM4, JUP, LILRB2, CPE, NLGN4X, ITGB2, ITGA4, ITGB3	0.0249426	1.02649
	GO:0002020	protease binding	10	2.24719	0.000731698	VWF, CST6, FAP, COMP, PYCARD, CSTA, BDKRB2, ITGB3, FN1, CD28	0.024778	1.07932
	GO:0005102	receptor binding	20	4.49438	0.000943424	CXCL1, CAV1, CCL2, LYN, C3, IGFBP6, CYTL1, PLAUR, EPHB2, TGFB2, LIF, CD86, TNFSF10, LAMA4, SERPINE2, SMARCD3, CD2, SELPLG, NMU, TYROBP	0.0301859	1.38961
	GO:0016504	peptidase activator activity	4	0.898876	0.00146113	CAV1, FBLN1, PCOLCE, FN1	0.0441064	2.14448
	DEG, differentially expresssed genes.

## Sheet: Suppl3
		Supplementary File 3: GO annotation of biological process for upregulated glomerular and tubulointerstital DEGs enriched in extracellular vesicles
			Count	%	PValue	Genes	Benjamini	FDR
		enriched in exosomes
		leukocyte migration	9	0.122716	3.54707e-09	CD48, CD44, LYN, LCK, COL1A2, ITGB2, ITGB3, ITGAM, FN1	1.63165e-06	5.04801e-06
		extracellular matrix organization	10	0.136351	7.98164e-09	VWF, PXDN, CD44, LUM, COL6A3, COL1A2, ITGB2, ITGB3, ITGAM, FN1	1.83578e-06	1.13591e-05
		platelet degranulation	8	0.109081	2.83554e-08	VWF, LYN, CLU, SERPINA3, ACTN1, ITGB3, CFD, FN1	4.34782e-06	4.0354e-05
		complement activation	7	0.0954459	2.73145e-07	C1QB, C3, CLU, CFH, CFD, IGKC, IGLC1	3.14112e-05	0.000388726
		B cell receptor signaling pathway	6	0.0818107	6.59281e-07	PTPRC, LYN, LCK, MNDA, IGKC, IGLC1	6.0652e-05	0.000938252
		platelet activation	7	0.0954459	1.42495e-06	VWF, RAC2, LYN, LCK, COL1A2, ACTN1, ITGB3	0.00010924	0.0020279
		complement activation, alternative pathway	4	0.0545405	7.83731e-06	C3, CFH, CFD, VSIG4	0.000514893	0.0111531
		cell adhesion	10	0.136351	1.02011e-05	VWF, CD44, COL6A3, COL15A1, ITGB2, ITGB3, SPON2, ITGAM, FN1, CDH6	0.000586394	0.0145167
		negative regulation of endopeptidase activity	6	0.0818107	3.54461e-05	C3, COL6A3, SERPINA3, SLPI, CSTA, WFDC2	0.00181008	0.0504334
		proteolysis	9	0.122716	0.000138857	C1QB, C3, MMP7, LTF, PAPPA2, CFD, IGKC, IGLC1, WFDC2	0.0063675	0.197433
		complement activation, classical pathway	5	0.0681756	0.000247692	C1QB, C3, CLU, IGKC, IGLC1	0.0103058	0.351926
		innate immune response	8	0.109081	0.000340092	C1QB, LYN, LCK, CLU, SLPI, IGKC, SPON2, IGLC1	0.0129544	0.482915
		collagen catabolic process	4	0.0545405	0.0010214	COL6A3, COL1A2, COL15A1, MMP7	0.0355145	1.44383
		regulation of immune response	5	0.0681756	0.00222289	C3, COL1A2, ITGB2, IGKC, IGLC1	0.0705098	3.1174
		cellular protein metabolic process	4	0.0545405	0.00581949	IGFBP6, LYZ, LTF, PAPPA2	0.163882	7.9706
		retina homeostasis	3	0.0409054	0.00680484	LYZ, LTF, IGKC	0.178241	9.2602
		immune response	6	0.0818107	0.00956185	PXDN, CD86, C3, SLPI, IGKC, IGLC1	0.228931	12.7798
		peptide cross-linking	3	0.0409054	0.0104786	TGM2, CSTA, FN1	0.23601	13.9218
		blood coagulation	4	0.0545405	0.0193141	VWF, LYN, COL1A2, ITGB3	0.361459	24.2368
		extracellular matrix disassembly	3	0.0409054	0.0231663	CD44, MMP7, FN1	0.401556	28.3639
		T cell costimulation	3	0.0409054	0.0243147	CD86, LYN, LCK	0.402308	29.5531
		inflammatory response	5	0.0681756	0.0295666	LYN, C3, SERPINA3, LYZ, ITGB2	0.424335	34.7617
		cell-matrix adhesion	3	0.0409054	0.0316764	CD44, ITGB2, ITGB3	0.43419	36.7514
		integrin-mediated signaling pathway	3	0.0409054	0.0377006	ITGB2, ITGB3, ITGAM	0.480416	42.1266
		enriched in blood microparticles
		complement activation	6	0.504626	1.83829e-10	C1QB, C3, CLU, CFH, IGKC, IGLC1	1.76476e-08	2.02469e-07
		complement activation, classical pathway	5	0.420521	7.81389e-08	C1QB, C3, CLU, IGKC, IGLC1	3.75066e-06	8.60619e-05
		innate immune response	4	0.336417	0.000848424	C1QB, CLU, IGKC, IGLC1	0.0267955	0.930492
		platelet degranulation	3	0.252313	0.00101849	CLU, SERPINA3, FN1	0.0241596	1.11606
		proteolysis	4	0.336417	0.00131416	C1QB, C3, IGKC, IGLC1	0.0249324	1.43793
		regulation of immune response	3	0.252313	0.00300011	C3, IGKC, IGLC1	0.0469366	3.25512
		complement activation, alternative pathway	2	0.168209	0.00617795	C3, CFH	0.0814776	6.59776
		positive regulation of B cell activation	2	0.168209	0.0123225	IGKC, IGLC1	0.138249	12.7648
		phagocytosis, recognition	2	0.168209	0.0132648	IGKC, IGLC1	0.132759	13.6772
		regulation of complement activation	2	0.168209	0.0142064	C3, CFH	0.128343	14.5801
		immune response	3	0.252313	0.0158863	C3, IGKC, IGLC1	0.130431	16.1697
		phagocytosis, engulfment	2	0.168209	0.0165569	IGKC, IGLC1	0.125028	16.7967
		acute-phase response	2	0.168209	0.0184338	SERPINA3, FN1	0.128375	18.529
		B cell receptor signaling pathway	2	0.168209	0.0254441	IGKC, IGLC1	0.161995	24.7133
		DEG, differentially expresssed genes.
